# Supplementary material for: Self-assembling human heart organoids for the modeling of cardiac development and congenital heart disease
Source: Research Square preprint supplement (doi:10.21203/rs.3.rs-132349/v1), 2020-12-31
Supplement: Supplementary file 1 [file 5f853eccbd9673a3b00ca35e.pdf]

## **SUPPLEMENTARY DATA**

### **SELF-ASSEMBLING HUMAN HEART ORGANOIDS FOR THE MODELING OF CARDIAC DEVELOPMENT AND CONGENITAL HEART DISEASE**

Yonatan R. Lewis Israeli<sup>1,2</sup>, Aaron H. Wasserman<sup>1,2</sup>, Mitchell Gabalski<sup>1,2</sup>, Kristen Ball<sup>1,2</sup>, Brett Volmert<sup>1,2</sup>, Weiyang Yang<sup>3,4</sup>, Bo Li<sup>2,3</sup>, Jinyun Zou<sup>6</sup>, Guangming Ni<sup>6</sup>, Natalia Pajares<sup>5</sup>, Xanthippi Chatzistavrou<sup>5</sup>, Chao Zhou<sup>6</sup>, Zhen Qiu<sup>2,3</sup>, Wen Li<sup>3,4</sup> and Aitor Aguirre<sup>1,2\*</sup>

<sup>1</sup>Institute for Quantitative Health Science and Engineering, Division of Developmental and Stem Cell Biology, Michigan State University, MI, USA

<sup>2</sup>Department of Biomedical Engineering, College of Engineering, Michigan State University, MI, USA

<sup>3</sup>Institute for Quantitative Health Science and Engineering, Division of Biomedical Devices, Michigan State University, MI, USA

<sup>4</sup>Department of Electrical and Computer Engineering, College of Engineering, Michigan State University, MI, USA

<sup>5</sup>Department of Chemical Engineering and Material Science, College of Engineering, Michigan State University, MI, USA

<sup>6</sup>Department of Biomedical Engineering, Washington University at Saint Louis, MO, USA

\*Corresponding author (email: [aaguirre@msu.edu](mailto:aaguirre@msu.edu))

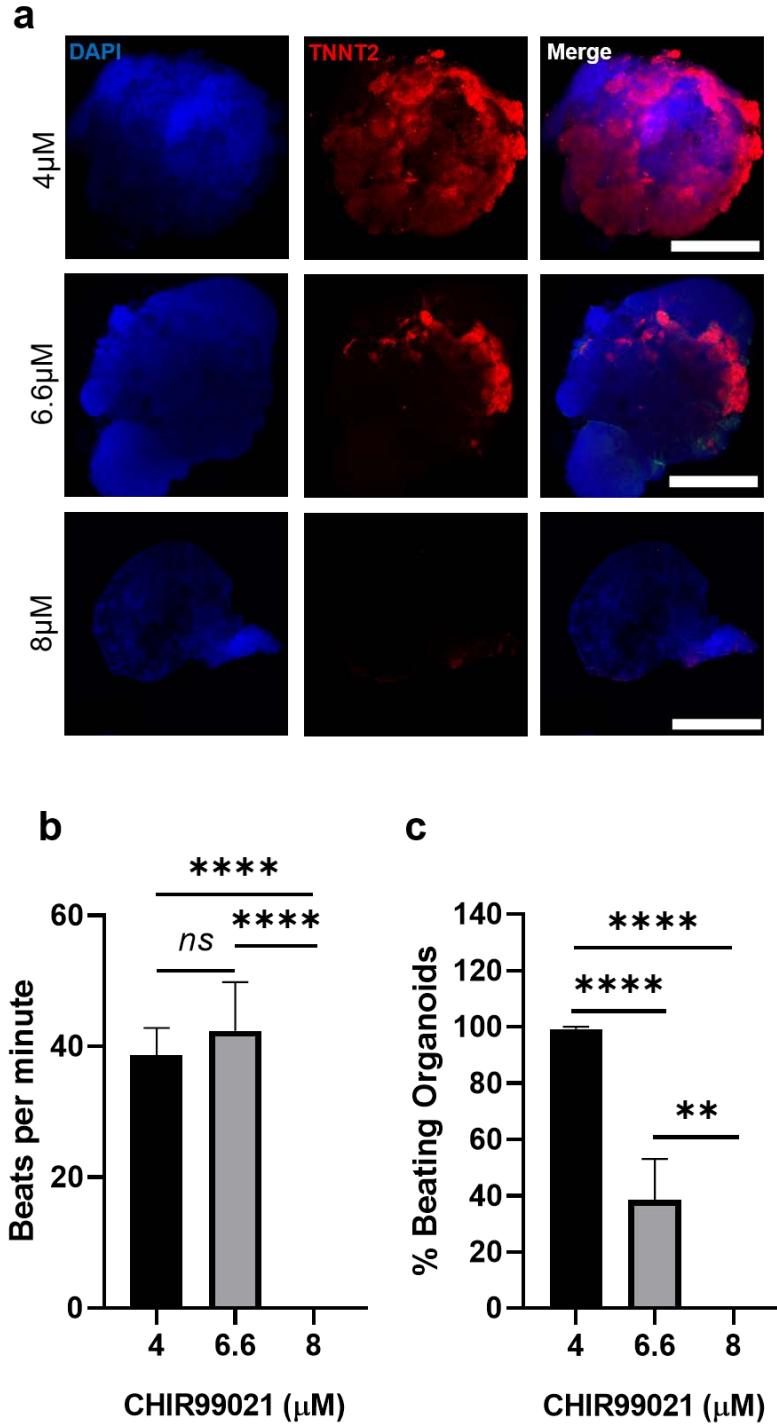

**Supplementary Figure 1.** **a**, Confocal immunofluorescent images for DAPI (blue) and TNNT2 (red), in organoids with CHIR99021 exposure concentrations of 4 $\mu$ M (top), 6.6 $\mu$ M (middle), and 8 $\mu$ M (bottom) at day 15. Scale bars, 500 $\mu$ m. **b**, Frequency of beats per minute of the hHOs and **c**, percentage of beating hHOs per treatment. (Value = mean  $\pm$  s.d., 1-way ANOVA multiple comparison test; \*\* $p$ <0.01, \*\*\*\* $p$ <0.0001).

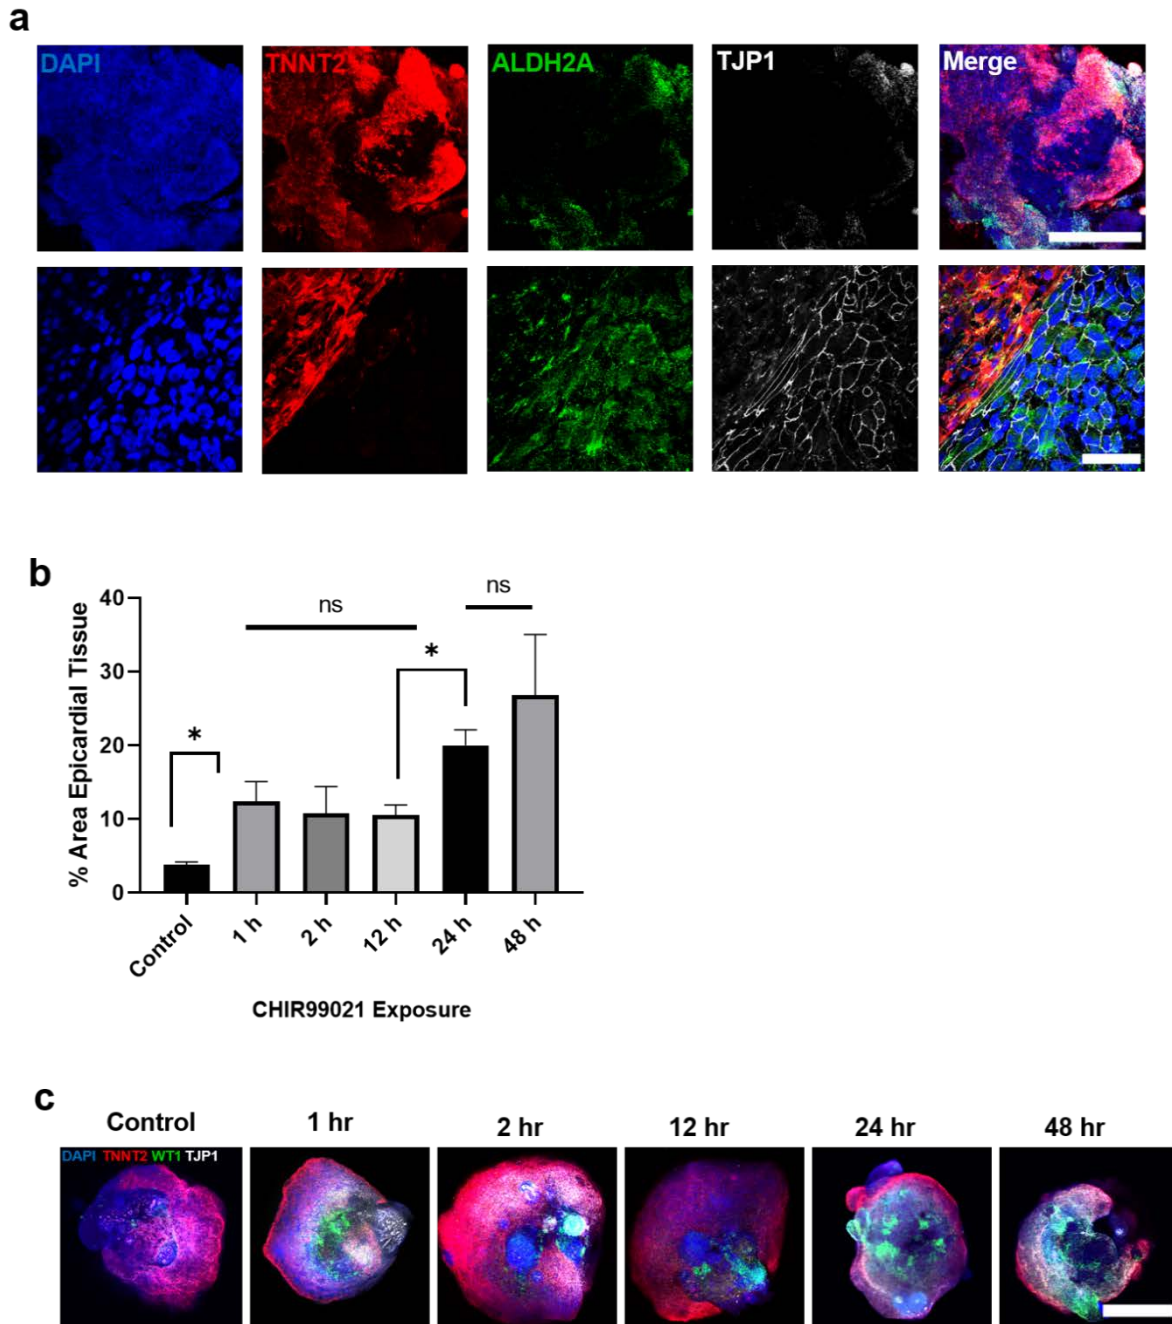

**Supplementary Figure 2.** **a**, Confocal immunofluorescent images for DAPI (blue) and TNNT2 (red), in hHOs showing epicardial markers ALDH2A (green) and TJP1 (white) near edge of the organoid. **b**, Area analysis of cardiomyocyte regions (TNNT2+) and epicardial regions (WT1+ and TJP1+) within organoids taken at multiple z-planes as a percentage of DAPI+ regions of each organoid treated with CHIR99021 at day 7 for different time durations, and **c**, representative confocal immunofluorescent images of organoids from these time durations: Scale bar: 500  $\mu$ m. (Value = mean  $\pm$  s.d., 1-way ANOVA multiple comparison test; \* $p$ <0.05).

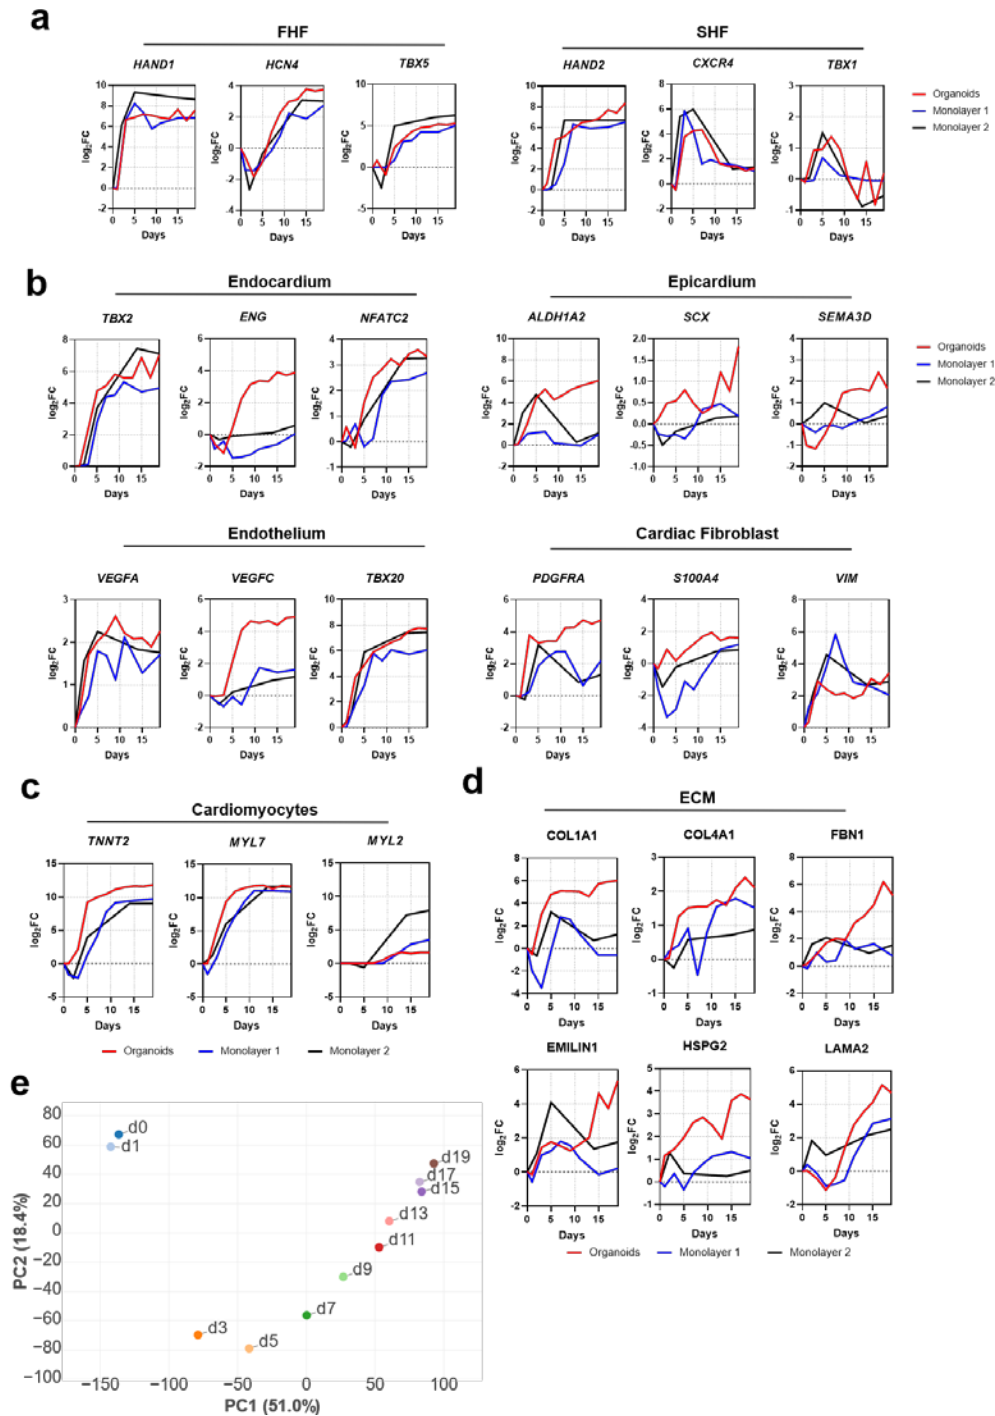

**Supplementary Figure 3.a**, Gene expression analysis indicating of more first and second heart field markers over heart organoid differentiation process. **b**, Gene expression analysis (log<sub>2</sub> fold-change vs. D0) for cardiac-specific cell type populations in heart organoids, including (from top left to bottom right) endocardial cells, epicardial cells, endothelium and cardiac fibroblasts. **c**, Gene expression analysis (log<sub>2</sub> fold-change vs. D0) for cardiomyocyte markers. **d**, Gene expression analysis (log<sub>2</sub> fold-change vs. D0) for ECM protein coding genes that are present in cardiac tissue. **e**, Principal component analysis of heart organoid differentiation over time.

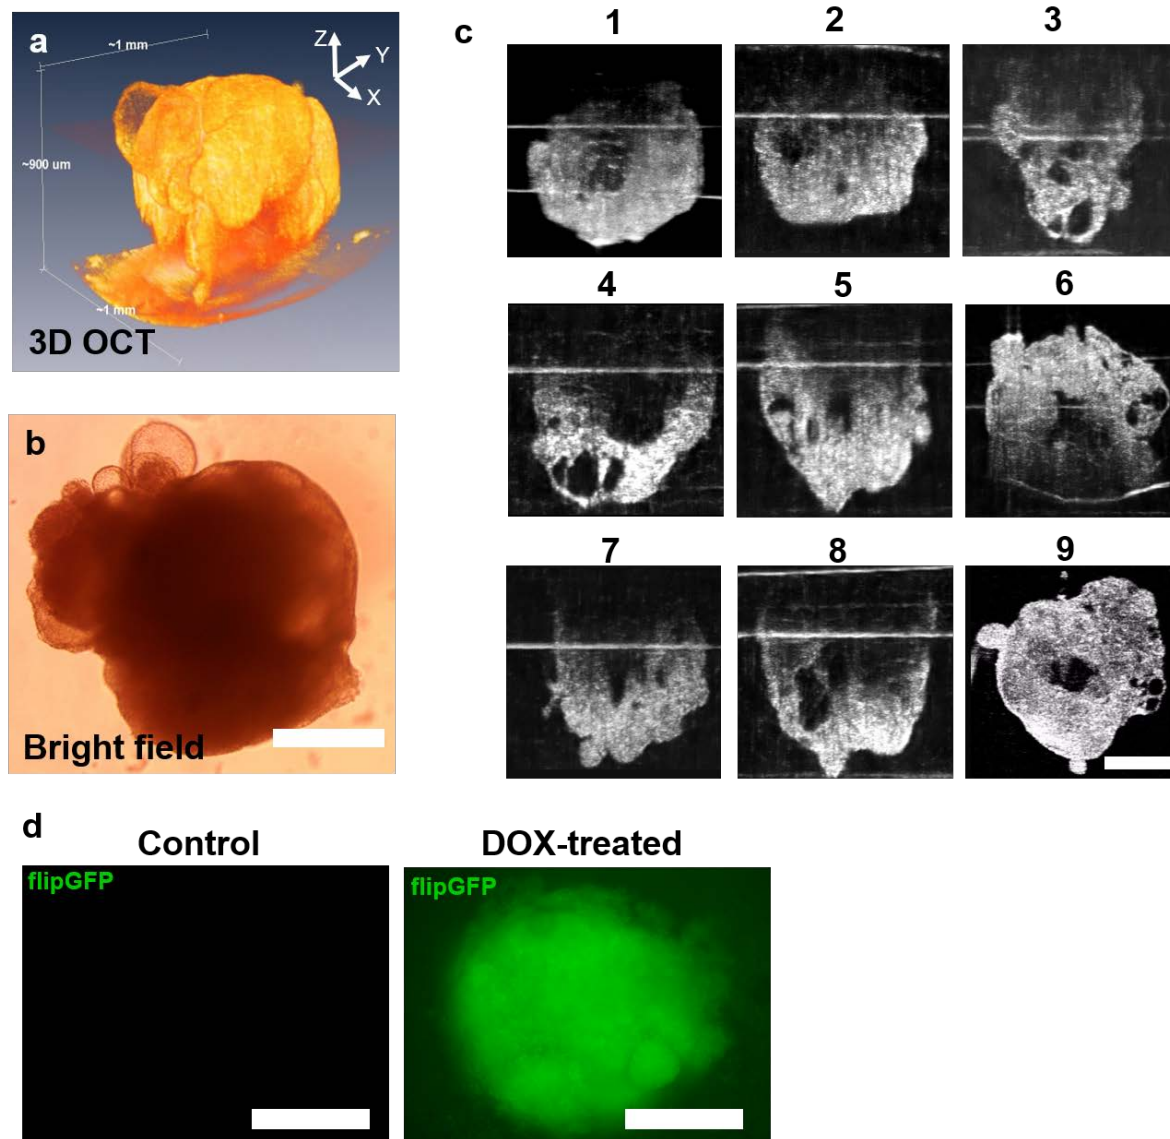

**Supplementary Figure 4.** **a**, 3D reconstruction of OCT images and **b**, bright field image of hHO. **c**, OCT images showing cross-section of center of 9 different organoids, revealing central chambers; scale bar: 500μm. **d**, Immunofluorescence images of organoids derived from a flipGFP transgenic iPSC line L1 showing no apoptosis in control hHOs (left) and high apoptosis in hHOs treated with 5μM Doxorubicin (DOX) (right); scale bar: 500μm.

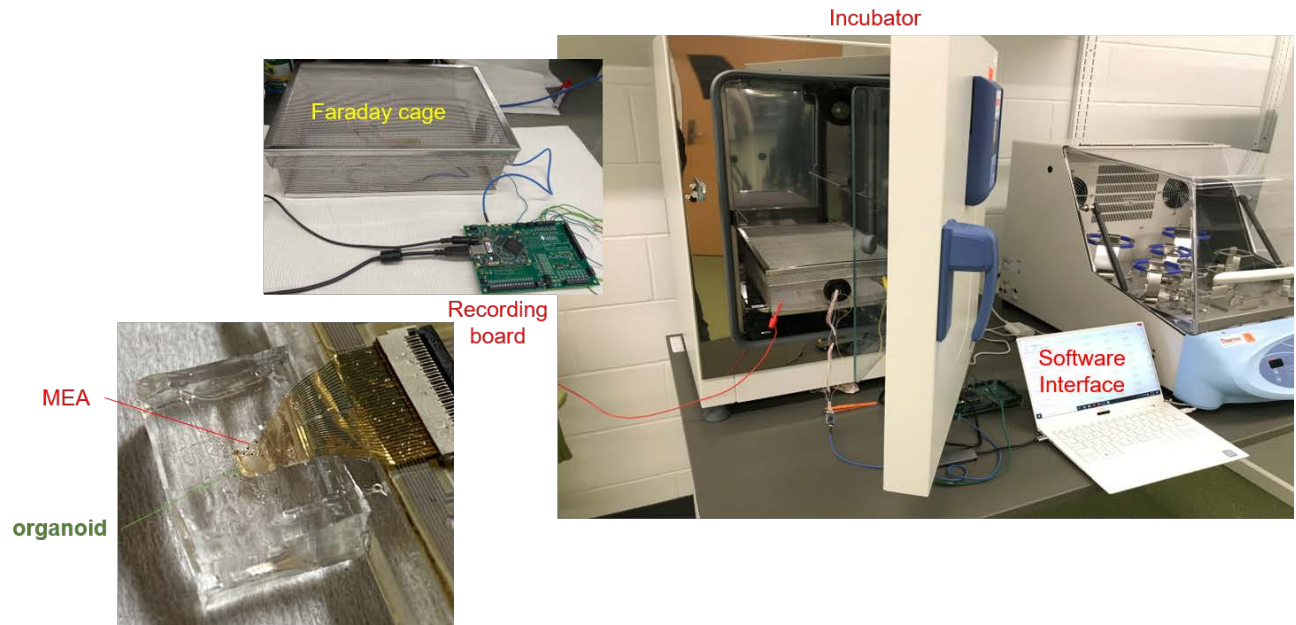

**Supplementary Figure 5.** Microelectrode array (MEA) recording system showing the gold electrode array in a PDMS chamber where the organoid is placed within a Faraday cage inside an incubator.

**a**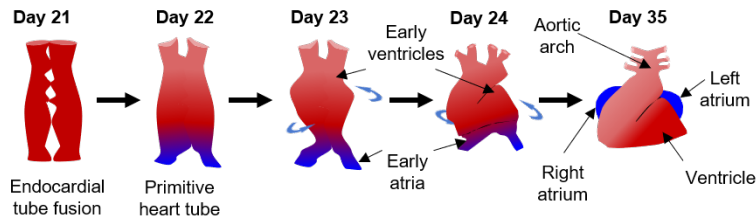**b**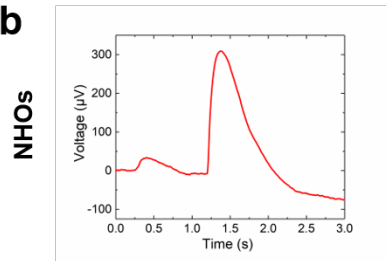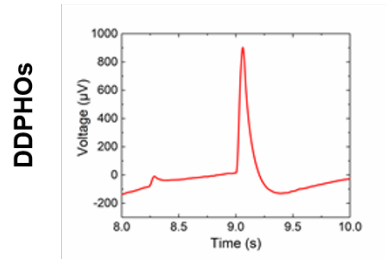**c**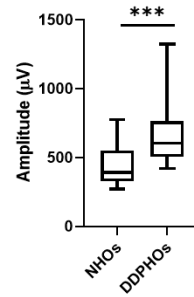**d**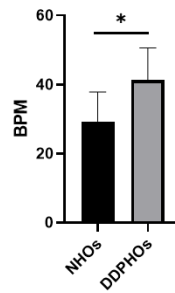**e**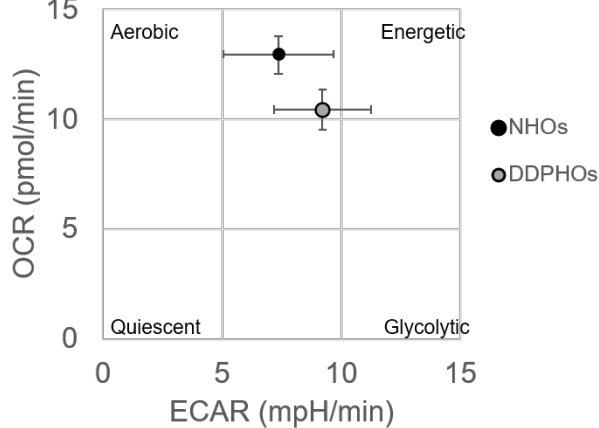

**Supplementary Figure 6. Human heart organoids modeling functional features healthy vs diabetic conditions.** **a**, Schematic of heart tube formation and looping into the four chambers of the heart. **b**, Representative MEA electrophysiology detail of normal vs. diabetic organoids. **c**, Amplitude magnitude in  $\mu V$  of action potentials in normal and diabetic hHOs ( $n > 12$  over 3 replicates per condition; unpaired t-test, \*\*\* $p < 0.001$ ). **d**, Beating frequency in beats per minute (BPM) in normal and diabetic organoids as recorded by MEA (mean  $\pm$  SD,  $n > 5$  organoids; unpaired t-test, \* $p < 0.05$ ). **e**, Seahorse energy map of normal and diabetic-like organoids (mean  $\pm$  SD).

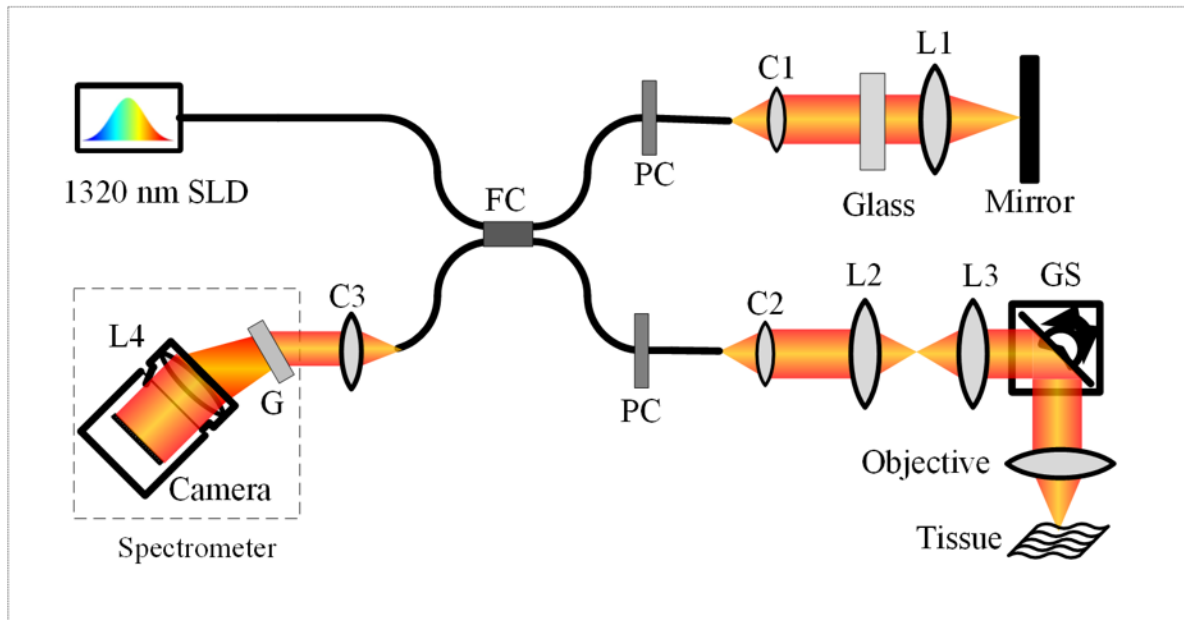

**Supplementary Figure 7.** Illustration of a custom SD-OCT imaging system, FC: fiber coupler, PC: polarization controller, C1-C3: collimator, L1 - L4: lens, GS: galvo scanner; G: grating.

|           | Antibody name   | Host Species       | Dilution | Vendor                   |
|-----------|-----------------|--------------------|----------|--------------------------|
| Primary   | cTnT            | Mouse              | 1:200    | Abcam                    |
|           | WT1             | Rabbit             | 1:200    | Abcam                    |
|           | ZO1             | Goat               | 1:250    | Thermo Fisher Scientific |
|           | ALDH1A2         | Rabbit             | 1:200    | Abcam                    |
|           | Vimentin        | Goat               | 1:200    | Abcam                    |
|           | CD90/Thy1       | Rabbit             | 1:200    | Abcam                    |
|           | NFAT2           | Rabbit             | 1:100    | Abcam                    |
|           | CD31            | Rabbit             | 1:50     | Abcam                    |
| Secondary | Alexa Fluor 488 | Donkey anti-mouse  | 1:200    | Thermo Fisher Scientific |
|           | Alexa Fluor 488 | Donkey anti-rabbit | 1:200    | Thermo Fisher Scientific |
|           | Alexa Fluor 594 | Donkey anti-mouse  | 1:200    | Thermo Fisher Scientific |
|           | Alexa Fluor 594 | Donkey anti-rabbit | 1:200    | Thermo Fisher Scientific |
|           | Alexa Fluor 647 | Donkey anti-goat   | 1:200    | Thermo Fisher Scientific |

**Supplementary Table 2.** Antibodies used for immunofluorescence in this report.
