# Supplementary material for: Self-assembling human heart organoids for the modeling of cardiac development and congenital heart disease
Source: Research Square preprint supplement (doi:10.21203/rs.3.rs-132349/v1), 2020-12-31
Supplement: Supplementary file 2 [file 85bbcf68aeac90b0017f0580.xlsx]

## Sheet: cluster 1
Term	Overlap	P-value	Adjusted P-value	Old P-value	Old Adjusted P-value	Odds Ratio	Combined Score	Genes
BMP Signaling Pathway in Eyelid Development WP3927	44002	9.89196e-05	0.0466901	0	0	7.46269	68.8149	BMP4;FOXC2;SMAD4;SMAD5;FGFR2;MAPK3
PDGF Pathway WP2526	14427	0.00082536	0.194785	0	0	4.46486	31.6991	NFKBIA;TIAM1;SRC;ARFIP2;RAF1;MAPK3;VAV2
AGE/RAGE pathway WP2324	24351	0.00124451	0.195802	0	0	3.39213	22.69	IKBKB;NFKBIA;MMP14;IRS1;SRC;MSN;RAF1;MAPK3;SOD1
Ras Signaling WP4223	17/184	0.00124643	0.147079	0	0	2.29829	15.3698	NTRK1;FLT1;RASA4B;TTBK1;IKBKB;MAPK10;TIAM1;ZAP70;RASA4;ABL1;RAC2;GNB3;RAF1;RAPGEF5;FGFR2;BCL2L1;MAPK3
Ebola Virus Pathway on Host WP4217	13/129	0.0020937	0.197646	0	0	2.50685	15.4643	HLA-B;VAV2;TIAM1;SOCS3;ADAM17;CTSL;NPC2;TYRO3;VPS11;ITGA5;MFGE8;FOLR1;MAPK3
Prolactin Signaling Pathway WP2037	28004	0.00335782	0.264149	0	0	2.9458	16.7806	NFKBIA;ZAP70;SOCS3;IRS1;SRC;PPIB;RAF1;VAV2;MAPK3
Ectoderm Differentiation WP2858	13/138	0.00378013	0.254889	0	0	2.34336	13.0712	SMAD4;FZD5;PTPN13;HDAC6;BMP4;SDCBP;PPFIBP2;BOC;ROR2;TBL1X;CCDC130;FGFR2;FOXA2
Follicle Stimulating Hormone (FSH) signaling pathway WP2035	43978	0.00400681	0.236402	0	0	4.6066	25.4273	SRC;FSHR;RAF1;MAPK3;APPL1
Intraflagellar transport proteins binding to dynein WP4532	43978	0.00400681	0.210135	0	0	4.6066	25.4273	IFT43;DYNLT3;WDR19;DYNLRB1;DYNC1I1
IL-4 Signaling Pathway WP395	19906	0.00565148	0.26675	0	0	3.22462	16.6901	IKBKB;NFKBIA;SOCS3;IRS1;FES;GATA3;MAPK3
Mesodermal Commitment Pathway WP2857	13/147	0.00642903	0.275864	0	0	2.19988	11.1027	FOXC2;SMAD4;FZD5;CHRD;GATA3;ACVR2B;TBX3;BMP4;EPB41L5;EXT2;TWSG1;TRIM5;FOXA2
Interleukin-11 Signaling Pathway WP2332	16224	0.00794381	0.312457	0	0	3.39213	16.4022	IKBKB;SOCS3;SRC;FES;RAF1;MAPK3
Genes related to primary cilium development (based on CRISPR) WP4536	10/103	0.00848885	0.30821	0	0	2.41511	11.5177	IFT43;KIF3B;ARL3;TCTN2;CEP295;WDR19;RABL2A;CBY1;CEP97;IFT57
Neovascularisation processes WP4331	43942	0.00898229	0.302831	0	0	4.73821	22.3288	CXCR4;EPHB2;SMAD5;MAPK3
Pancreatic adenocarcinoma pathway WP4263	32752	0.00946672	0.297886	0	0	2.51551	11.7222	IKBKB;MAPK10;TIAM1;SMAD4;RAC2;RAF1;DUSP6;MAPK3;BCL2L1
Senescence and Autophagy in Cancer WP615	10/105	0.00966888	0.285232	0	0	2.36911	10.9899	SMAD4;MMP14;RNASEL;SPARC;SRC;CREG1;PIK3C3;SLC39A2;RAF1;CDC25B
MAPK and NFkB Signalling Pathways Inhibited by Yersinia YopJ WP3849	43902	0.0108471	0.301165	0	0	6.21891	28.1335	IKBKB;NFKBIA;RAF1
Apoptosis Modulation and Signaling WP1772	33482	0.0108804	0.285308	0	0	2.46023	11.1222	IKBKB;NFKBIA;APAF1;IRAK1;CASP10;PTPN13;MAPK3;TNFRSF10D;BCL2L1
T-Cell antigen Receptor (TCR) pathway during Staphylococcus aureus infection WP3863	22828	0.0119226	0.296184	0	0	2.80854	12.4399	IKBKB;NFKBIA;ZAP70;GRAP2;RAF1;MALT1;MAPK3
Brain-Derived Neurotrophic Factor (BDNF) signaling pathway WP2380	12/144	0.0134774	0.318066	0	0	2.07297	8.92774	NFKBIA;IKBKB;NTRK1;MAPK10;TIAM1;ADAM17;IRS1;SRC;FRS2;RAF1;VAV2;MAPK3
Transcriptional cascade regulating adipogenesis WP4211	43903	0.0136855	0.307598	0	0	5.74053	24.635	GATA3;GATA2;KLF15
Wnt Signaling in Kidney Disease WP4150	13271	0.0139104	0.298441	0	0	3.45495	14.7703	INVS;MAPK10;FZD5;FZD7;DVL2
Chemokine signaling pathway WP3929	13/164	0.0152824	0.313622	0	0	1.97185	8.2444	CXCR4;ADCY7;VAV2;TIAM2;NFKBIA;IKBKB;PREX1;TIAM1;ELMO1;RAC2;GNB3;RAF1;MAPK3
EPO Receptor Signaling WP581	43947	0.0191547	0.376709	0	0	3.82702	15.1367	SRC;IRS1;RAF1;MAPK3
Neural Crest Differentiation WP2064	9/101	0.0204222	0.385571	0	0	2.21664	8.62524	BMP4;PRTG;MSX2;PAX7;DVL2;MSX1;FGFR2;HDAC6;HDAC7
Cardiac Hypertrophic Response WP2795	20241	0.0225486	0.409343	0	0	2.7137	10.2906	IKBKB;NRG1;RAF1;FGFR2;HDAC7;MAPK3
Hair Follicle Development: Cytodifferentiation (Part 3 of 3) WP2840	31990	0.0236533	0.413495	0	0	2.28741	8.56465	FOXQ1;BMP4;ADAM17;SMAD4;MSX2;GATA3;MSX1;KLK6
Epithelial to mesenchymal transition in colorectal cancer WP4239	12/159	0.0270855	0.456584	0	0	1.87741	6.7751	FOXQ1;FOXC2;SMAD4;SPARC;FZD5;CLDN15;FZD7;CLDN19;ITGA5;CLDN16;RAF1;MAPK3
T-Cell antigen Receptor (TCR) Signaling Pathway WP69	33086	0.0282976	0.460569	0	0	2.21117	7.88276	IKBKB;NFKBIA;ZAP70;GRAP2;GATA3;RAF1;MALT1;MAPK3
Amplification and Expansion of Oncogenic Pathways as Metastatic Traits WP3678	43907	0.0288879	0.454503	0	0	4.38982	15.559	SRC;TNC;CXCR4
Hedgehog Signaling Pathway WP4249	16193	0.0308725	0.470058	0	0	2.82678	9.83121	SMO;PTCH1;BOC;LRP2;CSNK1G1
Leptin signaling pathway WP2034	27942	0.0329059	0.485361	0	0	2.29118	7.82231	IKBKB;SOCS3;IRS1;SRC;RAF1;MAPK3;BCL2L1
TGF-B Signaling in Thyroid Cells for Epithelial-Mesenchymal Transition WP3859	43908	0.033655	0.481368	0	0	4.14594	14.0613	SMAD4;TNC;MAPK3
Ethanol effects on histone modifications WP3996	11414	0.0344612	0.478402	0	0	3.20976	10.8102	ALDH2;TYMS;HDAC6;HDAC7
ApoE and miR-146 in inflammation and atherosclerosis WP3926	43869	0.0384667	0.518751	0	0	6.21891	20.261	IRAK1;APOE
Dual hijack model of Vif in HIV infection WP3300	43869	0.0384667	0.504341	0	0	6.21891	20.261	APOBEC3G;CBFB
NAD Biosynthesis II (from tryptophan) WP2485	43869	0.0384667	0.49071	0	0	6.21891	20.261	HAAO;NADSYN1
Thymic Stromal LymphoPoietin (TSLP) Signaling Pathway WP2203	17288	0.0395705	0.491507	0	0	2.64634	8.54682	NFKBIA;SRC;FES;TNFSF4;MAPK3
Alpha 6 Beta 4 signaling pathway WP244	12145	0.0421061	0.509592	0	0	3.01523	9.55092	SRC;IRS1;LAMA1;MAPK3
Resistin as a regulator of inflammation WP4481	12145	0.0421061	0.496852	0	0	3.01523	9.55092	IKBKB;NFKBIA;PLCD1;MAPK3
Imatinib and Chronic Myeloid Leukemia WP3640	43910	0.0443259	0.510289	0	0	3.73134	11.6276	SPRED2;FLT1;ABL1
Oncostatin M Signaling Pathway WP2374	23894	0.0460877	0.517937	0	0	2.29621	7.06592	NFKBIA;SOCS3;IRS1;SRC;RAF1;MAPK3
Structural Pathway of Interleukin 1 (IL-1) WP2637	18019	0.0461173	0.506218	0	0	2.53833	7.80934	IKBKB;NFKBIA;MAPK10;IRAK1;MAPK3
Macrophage markers WP4146	43870	0.0481622	0.516649	0	0	5.52792	16.7672	CD163;RAC2
NLR Proteins WP288	43870	0.0481622	0.505168	0	0	5.52792	16.7672	IKBKB;EPHB2
Pyrimidine metabolism and related diseases WP4225	43870	0.0481622	0.494186	0	0	5.52792	16.7672	DPYD;TYMS
Role Altered Glycolysation of MUC1 in Tumour Microenvironment WP4480	43870	0.0481622	0.483672	0	0	5.52792	16.7672	IKBKB;NFKBIA
Supression of HMGB1 mediated inflammation by THBD WP4479	43870	0.0481622	0.473595	0	0	5.52792	16.7672	IKBKB;NFKBIA
Glycerophospholipid Biosynthetic Pathway WP2533	43911	0.0502165	0.483718	0	0	3.55366	10.6305	PCYT2;AGPS;CDS2
Viral Acute Myocarditis WP4298	30864	0.0520566	0.491414	0	0	2.07297	6.1265	SRC;RAC2;KRT8;ABL1;CXCR4;MAPK3;BCL2L1
Vitamin D in inflammatory diseases WP4482	43912	0.0564662	0.522589	0	0	3.39213	9.74937	IKBKB;NFKBIA;SMAD4
Cardiac Progenitor Differentiation WP2406	19480	0.0610318	0.553981	0	0	2.34676	6.56238	BMP4;CXCR4;NRG1;ROR2;FOXA2
EBV LMP1 signaling WP262	43913	0.0630652	0.561637	0	0	3.24465	8.96686	NFKBIA;IKBKB;IRAK1
Amyotrophic lateral sclerosis (ALS) WP2447	13971	0.0650479	0.568567	0	0	2.61849	7.15536	APAF1;DERL1;SOD1;BCL2L1
RANKL/RANK (Receptor activator of NFKB (ligand)) Signaling Pathway WP2018	20210	0.0693992	0.595571	0	0	2.26142	6.0332	IKBKB;NFKBIA;SRC;TNFRSF11A;MAPK3
Angiogenesis WP1539	43914	0.0700028	0.590024	0	0	3.10945	8.26872	FLT1;SRC;FGFR2
Chromosomal and microsatellite instability in colorectal cancer WP4216	26816	0.0730088	0.604564	0	0	2.04457	5.351	MAPK10;SMAD4;RAC2;RAF1;APPL1;MAPK3
Microglia Pathogen Phagocytosis Pathway WP3937	14702	0.0757228	0.616227	0	0	2.48756	6.41959	RAC2;PIK3C3;PIK3R6;VAV2
TNF alpha Signaling Pathway WP231	33786	0.0770383	0.616306	0	0	1.89271	4.85187	IKBKB;NFKBIA;APAF1;RAF1;GLUL;MAPK3;BCL2L1
Adipogenesis WP236	9/130	0.078961	0.62116	0	0	1.72216	4.37222	BMP4;SOCS3;FOXC2;IRS1;CELF1;ID3;GATA3;GATA2;KLF15
Bile Acids synthesis and enterohepatic circulation WP4389	43873	0.081589	0.631311	0	0	4.14594	10.39	ABCB11;MAPK3
Preimplantation Embryo WP3527	21306	0.0830723	0.632421	0	0	2.14445	5.33549	FOXQ1;GATA3;GATA2;ZFP36L2;TBX3
TNF related weak inducer of apoptosis (TWEAK) Signaling Pathway WP2036	15432	0.087219	0.65345	0	0	2.36911	5.77904	IKBKB;NFKBIA;RAF1;MAPK3
RIG-I-like Receptor Signaling WP3865	22037	0.0929202	0.685287	0	0	2.07297	4.9254	IKBKB;NFKBIA;MAPK10;SIKE1;CASP10
IL-6 signaling pathway WP364	15797	0.0932654	0.67725	0	0	2.31401	5.48954	SOCS3;PRDM1;MAPK3;BCL2L1
Disorders of Folate Metabolism and Transport WP4259	43874	0.0939351	0.671778	0	0	3.82702	9.05148	TYMS;FOLR1
Kennedy pathway from Sphingolipids WP3933	43874	0.0939351	0.661751	0	0	3.82702	9.05148	SGPL1;PCYT2
Osteopontin Signaling WP1434	43874	0.0939351	0.65202	0	0	3.82702	9.05148	IKBKB;MAPK3
VEGFA-VEGFR2 Signaling Pathway WP3888	14/236	0.0953707	0.652391	0	0	1.47567	3.46781	FLT1;ARHGEF15;SRC;FRS2;PGF;VAV2;RND1;HDAC7;NFKBIA;DOK1;MMP14;RAF1;BCL2L1;MAPK3
ESC Pluripotency Pathways WP3931	8/116	0.0957007	0.645296	0	0	1.71556	4.02561	BMP4;SMAD4;FZD5;FZD7;DVL2;RAF1;SMAD5;FGFR2
TYROBP Causal Network WP3945	22402	0.0980588	0.651884	0	0	2.03899	4.73491	SLC7A7;ELF4;NPC2;DPYD;ZFP36L2
Heart Development WP1591	16163	0.0995047	0.652308	0	0	2.26142	5.21834	BMP4;FOXC2;SMAD4;FOXA2
Nanoparticle-mediated activation of receptor signaling WP2643	43918	0.100902	0.652404	0	0	2.66525	6.11303	MAPK10;SRC;RAF1
TLR4 Signaling and Tolerance WP3851	43918	0.100902	0.643588	0	0	2.66525	6.11303	IKBKB;NFKBIA;IRAK1
Focal Adhesion WP306	12/198	0.103506	0.651399	0	0	1.50761	3.41945	MAPK10;FLT1;VWF;SRC;LAMA1;RAC2;TNC;ITGA5;RAF1;PGF;VAV2;MAPK3
Cannabinoid receptor signaling WP3869	43919	0.109349	0.679113	0	0	2.57334	5.69535	MAPK10;ADCY7;MAPK3
MAPK Cascade WP422	43919	0.109349	0.670293	0	0	2.57334	5.69535	MAPK10;RAF1;MAPK3
Insulin Signaling WP481	10/160	0.111567	0.675122	0	0	1.55473	3.40972	INPP4A;IKBKB;MAPK10;SOCS3;IRS1;RAC2;FLOT2;PIK3C3;RAF1;MAPK3
Integrin-mediated Cell Adhesion WP185	7/101	0.112204	0.670386	0	0	1.72405	3.77125	MAPK10;CAPN9;SRC;RAC2;ITGA5;RAF1;VAV2
Regulation of Microtubule Cytoskeleton WP2038	16893	0.112543	0.664001	0	0	2.1631	4.72512	TIAM1;SRC;ABL1;EPHB2
Tryptophan metabolism WP465	16893	0.112543	0.655803	0	0	2.1631	4.72512	ECHS1;ALDH2;HAAO;INMT
Dopaminergic Neurogenesis WP2855	43920	0.118058	0.679551	0	0	2.48756	5.31488	OTX2;MSX1;FOXA2
Extracellular vesicle-mediated signaling in recipient cells WP2870	43920	0.118058	0.671364	0	0	2.48756	5.31488	SMAD4;MFGE8;RAF1
Apoptosis WP254	30834	0.121903	0.684978	0	0	1.77683	3.73939	IKBKB;NFKBIA;MAPK10;APAF1;CASP10;BCL2L1
MicroRNAs in cardiomyocyte hypertrophy WP1544	30834	0.121903	0.67692	0	0	1.77683	3.73939	IKBKB;NRG1;RAF1;FGFR2;HDAC7;MAPK3
Association Between Physico-Chemical Features and Toxicity Associated Pathways WP3680	24228	0.125806	0.69047	0	0	1.88452	3.90663	FZD5;SRC;FZD7;RAF1;SOD1
Hepatitis C and Hepatocellular Carcinoma WP3646	17989	0.133417	0.723827	0	0	2.03066	4.09031	SMAD4;VAV2;MAPK3;BCL2L1
IL-3 Signaling Pathway WP286	17989	0.133417	0.715602	0	0	2.03066	4.09031	SRC;RAF1;MAPK3;BCL2L1
Hedgehog Signaling Pathway WP47	43877	0.133693	0.709022	0	0	3.10945	6.25688	SMO;PTCH1
ID signaling pathway WP53	43877	0.133693	0.701144	0	0	3.10945	6.25688	ID3;PAX2
Tryptophan catabolism leading to NAD+ production WP4210	43877	0.133693	0.693439	0	0	3.10945	6.25688	HAAO;NADSYN1
Initiation of transcription and translation elongation at the HIV-1 LTR WP3414	11749	0.136205	0.69879	0	0	2.33209	4.64924	NFKBIA;NELFCD;HDAC7
White fat cell differentiation WP4149	11749	0.136205	0.691276	0	0	2.33209	4.64924	GATA3;GATA2;KLF15
PI3K-Akt Signaling Pathway WP4172	18/340	0.143541	0.72076	0	0	1.31694	2.55637	NTRK1;FLT1;VWF;IRS1;LAMA1;TNC;PIK3R6;PGF;IKBKB;EFNA2;CREB3L1;GNB3;COL9A2;ITGA5;RAF1;FGFR2;BCL2L1;MAPK3
Fluoropyrimidine Activity WP1601	12114	0.145615	0.723475	0	0	2.26142	4.35728	SMUG1;DPYD;TYMS
Signal transduction through IL1R WP4496	12114	0.145615	0.715939	0	0	2.26142	4.35728	IKBKB;NFKBIA;IRAK1
miRNA regulation of prostate cancer signaling pathways WP3981	12114	0.145615	0.708558	0	0	2.26142	4.35728	NFKBIA;CREB3L1;RAF1
Leptin Insulin Overlap WP3935	43878	0.147667	0.711211	0	0	2.92654	5.59789	SOCS3;IRS1
Regulation of Wnt/B-catenin Signaling by Small Molecule Compounds WP3664	43878	0.147667	0.704027	0	0	2.92654	5.59789	FZD7;DVL2
miR-509-3p alteration of YAP1/ECM axis WP3967	43878	0.147667	0.696986	0	0	2.92654	5.59789	SPARC;GPC6
DNA Damage Response (only ATM dependent) WP710	7/110	0.154445	0.721763	0	0	1.58299	2.9569	MAPK10;SMAD4;IRS1;ABL1;DVL2;RAC2;PIK3C3
Fatty Acid Beta Oxidation WP143	12479	0.15523	0.718319	0	0	2.19491	4.08878	ECHS1;GPD2;CPT1B
Signaling of Hepatocyte Growth Factor Receptor WP313	12479	0.15523	0.711345	0	0	2.19491	4.08878	SRC;RAF1;MAPK3
Type 2 papillary renal cell carcinoma WP4241	12479	0.15523	0.704505	0	0	2.19491	4.08878	ARNT2;PRCC;DVL2
Wnt Signaling Pathway WP363	19085	0.155735	0.700064	0	0	1.91351	3.55837	BCL9;DVL2;ROR2;CSNK1G1
ErbB Signaling Pathway WP673	33390	0.159612	0.710725	0	0	1.64015	3.00969	MAPK10;SRC;ABL1;NRG1;RAF1;MAPK3
4-hydroxytamoxifen, Dexamethasone, and Retinoic Acids Regulation of p27 Expression WP3879	43879	0.161918	0.714256	0	0	2.76396	5.03224	RAF1;MAPK3
Inhibition of exosome biogenesis and secretion by Manumycin A in CRPC cells WP4301	43879	0.161918	0.707642	0	0	2.76396	5.03224	RAF1;MAPK3
Primary Focal Segmental Glomerulosclerosis FSGS WP2572	26420	0.163251	0.706923	0	0	1.72747	3.13099	KIRREL3;CD151;CTSL;KRT8;PAX2
Apoptosis-related network due to altered Notch3 in ovarian cancer WP2864	19450	0.163465	0.701416	0	0	1.87741	3.40027	SOCS3;ABL1;NRG1;APOE
TGF-beta Receptor Signaling WP560	19815	0.171332	0.728545	0	0	1.84264	3.2507	BMP4;SMAD4;SMAD5;MAPK3
Apoptosis Modulation by HSP70 WP384	43880	0.176402	0.743409	0	0	2.61849	4.54304	MAPK10;APAF1
Extracellular vesicles in the crosstalk of cardiac cells WP4300	43880	0.176402	0.736831	0	0	2.61849	4.54304	CD63;SOD1
TP53 Network WP1742	43880	0.176402	0.730367	0	0	2.61849	4.54304	ABL1;OTX2
IL-1 signaling pathway WP195	20180	0.179326	0.736017	0	0	1.80914	3.10909	IKBKB;NFKBIA;IRAK1;MAPK3
Fibrin Complement Receptor 3 Signaling Pathway WP4136	13575	0.185166	0.753433	0	0	2.01694	3.40158	IKBKB;IRAK1;SRC
Type II interferon signaling (IFNG) WP619	13575	0.185166	0.746994	0	0	2.01694	3.40158	SOCS3;IFNGR1;HLA-B
miRNAs involvement in the immune response in sepsis WP4329	13575	0.185166	0.740663	0	0	2.01694	3.40158	IKBKB;NFKBIA;IRAK1
Secretion of Hydrochloric Acid in Parietal Cells WP2597	43835	0.185493	0.735737	0	0	4.97512	8.38178	CCKBR
TCA Cycle Nutrient Utilization and Invasiveness of Ovarian Cancer WP2868	43835	0.185493	0.729606	0	0	4.97512	8.38178	MAPK3
Hematopoietic Stem Cell Gene Regulation by GABP alpha/beta Complex WP3657	43881	0.191077	0.74536	0	0	2.48756	4.11711	SMAD4;BCL2L1
Serotonin Receptor 2 and ELK-SRF/GATA4 signaling WP732	43881	0.191077	0.73925	0	0	2.48756	4.11711	RAF1;MAPK3
B Cell Receptor Signaling Pathway WP23	35582	0.195433	0.749954	0	0	1.5387	2.51198	NFKBIA;IKBKB;RAC2;RAF1;MALT1;VAV2
Endoderm Differentiation WP2853	8/141	0.207536	0.789977	0	0	1.41138	2.21933	DUSP4;EPB41L5;SMAD4;HHEX;TRIM5;OTX2;RTF1;FOXA2
Kit receptor signaling pathway WP304	21641	0.212459	0.802246	0	0	1.68648	2.61237	DOK1;SRC;RAF1;MAPK3
MET in type 1 papillary renal cell carcinoma WP4205	21641	0.212459	0.795879	0	0	1.68648	2.61237	SRC;PRCC;RAF1;MAPK3
LncRNA-mediated mechanisms of therapeutic resistance WP3672	43836	0.218244	0.811113	0	0	4.14594	6.3107	BCL2L1
Robo4 and VEGF Signaling Pathways Crosstalk WP3943	43836	0.218244	0.804776	0	0	4.14594	6.3107	SRC
Type II diabetes mellitus WP1584	43883	0.220849	0.808067	0	0	2.26142	3.41537	IKBKB;IRS1
Nucleotide-binding Oligomerization Domain (NOD) pathway WP1433	15036	0.227112	0.82459	0	0	1.82017	2.69806	IKBKB;NFKBIA;PRDM1
Notch Signaling Pathway WP61	22372	0.229625	0.827351	0	0	1.63119	2.39998	ADAM17;NCSTN;SRC;GATA3
Signaling Pathways in Glioblastoma WP2261	30072	0.233786	0.835961	0	0	1.51681	2.20445	IRS1;SRC;RAF1;FGFR2;MAPK3
NRF2-ARE regulation WP4357	43884	0.235876	0.837093	0	0	2.1631	3.12449	SRC;EPHB2
Common Pathways Underlying Drug Addiction WP2636	15401	0.237873	0.83788	0	0	1.77683	2.55156	DRD2;RAF1;MAPK3
IL-2 Signaling Pathway WP49	15401	0.237873	0.831673	0	0	1.77683	2.55156	SOCS3;RAF1;MAPK3
Splicing factor NOVA regulated synaptic proteins WP4148	15401	0.237873	0.825558	0	0	1.77683	2.55156	KCNQ2;ATP2B1;NEO1
Alzheimers Disease WP2059	30437	0.241278	0.831263	0	0	1.49853	2.13062	ADAM17;NCSTN;APAF1;APOE;MAPK3
Glial Cell Differentiation WP2276	43837	0.24968	0.853979	0	0	3.55366	4.93097	MSN
Triacylglyceride Synthesis WP325	43885	0.250955	0.852164	0	0	2.07297	2.86584	GPAM;AGPS
Ciliary landscape WP4352	11/216	0.253204	0.853659	0	0	1.26681	1.74004	ECHS1;IFT43;GDI1;NME8;DYNLT3;EXOC6;DYNLRB1;CEP97;IFT57;NINL;CCDC40
Regulation of Actin Cytoskeleton WP51	8/150	0.256823	0.859721	0	0	1.3267	1.80347	RAC2;MSN;PIK3C3;ARPC5;RAF1;FGFR2;GIT1;MAPK3
Differentiation of white and brown adipocyte WP2895	43886	0.266058	0.884363	0	0	1.99005	2.6349	BMP4;SMAD5
Hypothesized Pathways in Pathogenesis of Cardiovascular Disease WP3668	43886	0.266058	0.878179	0	0	1.99005	2.6349	SMAD4;MAPK3
IL-7 Signaling Pathway WP205	43886	0.266058	0.87208	0	0	1.99005	2.6349	MAPK3;BCL2L1
Thermogenesis WP4321	6/108	0.267643	0.871224	0	0	1.38198	1.82159	SLC25A29;CREB3L1;FRS2;CPT1C;CPT1B;ADCY7
Notch Signaling WP268	16497	0.270615	0.874866	0	0	1.65837	2.16759	NCSTN;ADAM17;DVL2
Prostaglandin Synthesis and Regulation WP98	16497	0.270615	0.868914	0	0	1.65837	2.16759	TBXAS1;AKR1C3;PTGDS
Insulin signalling in human adipocytes (diabetic condition) WP3635	43838	0.279854	0.892506	0	0	3.10945	3.95985	IRS1
Insulin signalling in human adipocytes (normal condition) WP3634	43838	0.279854	0.886516	0	0	3.10945	3.95985	IRS1
Circadian rhythm related genes WP3594	10/201	0.290348	0.913629	0	0	1.23759	1.5305	NTRK1;MAPK10;ARNT2;ID3;RBM4B;TNFRSF11A;PTGDS;TYMS;DRD2;LGR4
RAC1/PAK1/p38/MMP2 Pathway WP3303	24929	0.291954	0.912598	0	0	1.46327	1.80152	IKBKB;NFKBIA;SRC;MAPK3
Eicosanoid Synthesis WP167	43888	0.296234	0.919883	0	0	1.84264	2.24177	TBXAS1;PTGDS
Sphingolipid pathway WP1422	43888	0.296234	0.913871	0	0	1.84264	2.24177	SGPL1;GAL3ST1
Benzo(a)pyrene metabolism WP696	43839	0.308815	0.946498	0	0	2.76396	3.24769	AKR1C3
Composition of Lipid Particles WP3601	43839	0.308815	0.940392	0	0	2.76396	3.24769	APOE
Methylation Pathways WP704	43839	0.308815	0.934363	0	0	2.76396	3.24769	INMT
Vitamin B12 Metabolism WP1533	18323	0.326037	0.980188	0	0	1.49254	1.67275	LRP2;APOE;SOD1
PDGFR-beta pathway WP3972	43890	0.326215	0.974517	0	0	1.71556	1.92177	RAF1;MAPK3
Selective expression of chemokine receptors during T-cell polarization WP4494	43890	0.326215	0.968388	0	0	1.71556	1.92177	IFNGR1;CXCR4
T-Cell Receptor and Co-stimulatory Signaling WP2583	43890	0.326215	0.962335	0	0	1.71556	1.92177	NFKBIA;ZAP70
Focal Adhesion-PI3K-Akt-mTOR-signaling pathway WP3932	14/303	0.335111	0.982438	0	0	1.14937	1.2566	FLT1;VWF;IRS1;LAMA1;TNC;PGF;IKBKB;EFNA2;CREB3L1;GNB3;ITGA5;RAF1;FGFR2;MAPK3
Interleukin-1 Induced Activation of NF-kappa-B WP3656	43840	0.336613	0.980749	0	0	2.48756	2.70851	IRAK1
Mammary gland development pathway - Involution (Stage 4 of 4) WP2815	43840	0.336613	0.974733	0	0	2.48756	2.70851	SOCS3
Type III interferon signaling WP2113	43840	0.336613	0.968789	0	0	2.48756	2.70851	IFNLR1
One carbon metabolism and related pathways WP3940	19054	0.348263	0.996243	0	0	1.43513	1.51377	PCYT2;TYMS;SOD1
Hippo-Merlin Signaling Dysregulation WP4541	6/120	0.352408	1	0	0	1.24378	1.29722	DDB1;NTRK1;FLT1;CDH12;ITGA5;FGFR2
Factors and pathways affecting insulin-like growth factor (IGF1)-Akt signaling WP3850	11355	0.355847	1	0	0	1.60488	1.65825	IRS1;ACVR2B
IL17 signaling pathway WP2112	11355	0.355847	0.999761	0	0	1.60488	1.65825	IKBKB;MAPK3
Toll-like Receptor Signaling WP3858	11355	0.355847	0.993845	0	0	1.60488	1.65825	IKBKB;IRAK1
Tumor suppressor activity of SMARCB1 WP4204	11355	0.355847	0.987999	0	0	1.60488	1.65825	SMO;PTCH1
Interferon type I signaling pathways WP585	19784	0.370411	1	0	0	1.38198	1.3725	ZAP70;SOCS3;IRS1
Mammary gland development pathway - Pregnancy and lactation (Stage 3 of 4) WP2817	11720	0.37049	1	0	0	1.55473	1.54373	TNFRSF11A;BCL2L1
DNA IR-Double Strand Breaks (DSBs) and cellular response via ATM WP3959	20149	0.381435	1	0	0	1.35685	1.30776	DCLRE1C;APAF1;ABL1
Hematopoietic Stem Cell Differentiation WP2849	20149	0.381435	1	0	0	1.35685	1.30776	CXCR4;GATA2;KLF1
Endothelin Pathways WP2197	12086	0.384998	1	0	0	1.50761	1.43904	NPY;RAF1
Monoamine GPCRs WP58	12086	0.384998	1	0	0	1.50761	1.43904	HTR1E;DRD2
Oxidative Stress WP408	12086	0.384998	1	0	0	1.50761	1.43904	MAPK10;SOD1
Bone Morphogenic Protein (BMP) Signalling and Regulation WP1425	43842	0.388904	1	0	0	2.07297	1.95776	SMAD4
RalA downstream regulated genes WP2290	43842	0.388904	1	0	0	2.07297	1.95776	RAC2
Wnt Signaling Pathway and Pluripotency WP399	5/102	0.391178	1	0	0	1.21939	1.14451	MAPK10;FZD5;FZD7;DVL2;ZBTB33
Toll-like Receptor Signaling Pathway WP75	5/103	0.399201	1	0	0	1.20755	1.10889	NFKBIA;IKBKB;MAPK10;IRAK1;MAPK3
Integrated Breast Cancer Pathway WP1984	7/151	0.405199	1	0	0	1.15317	1.04175	SMAD4;APOBEC3G;GDI1;IRS1;USP21;ABL1;CDC25B
Nuclear Receptors Meta-Pathway WP2882	14/319	0.406975	1	0	0	1.09172	0.981459	TXNRD3;SRC;NRG1;PTGR1;ABCB11;DNAJC15;PRDX6;SLC5A9;GPAM;ADGRF4;EHHADH;ENC1;MFGE8;SLC39A2
BMP2-WNT4-FOXO1 Pathway in Human Primary Endometrial Stromal Cell Differentiation WP3876	43843	0.413485	1	0	0	1.91351	1.68989	SMAD5
Cell-type Dependent Selectivity of CCK2R Signaling WP3679	43843	0.413485	1	0	0	1.91351	1.68989	CCKBR
Dopamine metabolism WP2436	43843	0.413485	1	0	0	1.91351	1.68989	SOD1
EDA Signalling in Hair Follicle Development WP3930	43843	0.413485	1	0	0	1.91351	1.68989	PTCH1
Estrogen Receptor Pathway WP2881	43843	0.413485	1	0	0	1.91351	1.68989	GPAM
MFAP5-mediated ovarian cancer cell motility and invasiveness WP3301	43843	0.413485	1	0	0	1.91351	1.68989	MAPK3
Valproic acid pathway WP3871	43843	0.413485	1	0	0	1.91351	1.68989	EHHADH
ERK Pathway in Huntington's Disease WP3853	43844	0.437078	1	0	0	1.77683	1.47058	RAF1
Angiopoietin Like Protein 8 Regulatory Pathway WP3915	6/132	0.438876	1	0	0	1.13071	0.931184	MAPK10;IRS1;FLOT2;PIK3C3;RAF1;MAPK3
Melatonin metabolism and effects WP3298	13547	0.441445	1	0	0	1.34463	1.09951	IRAK1;APOE
Pyrimidine metabolism WP4022	31138	0.44739	1	0	0	1.17062	0.941555	POLR2C;DPYD;CMPK2;TYMS
Sudden Infant Death Syndrome (SIDS) Susceptibility Pathways WP706	7/158	0.451321	1	0	0	1.10208	0.876793	TSPYL1;MBD1;GNB3;GATA3;GATA2;SCN3B;NKX3-1
Sleep regulation WP3591	13912	0.45511	1	0	0	1.30924	1.03066	DRD2;PTGDS
ncRNAs involved in Wnt signaling in hepatocellular carcinoma WP4336	31503	0.456331	1	0	0	1.15701	0.907715	FZD5;FZD7;DVL2;ROR2
Fatty Acid Omega Oxidation WP206	43845	0.459723	1	0	0	1.65837	1.28877	ALDH2
GPR40 Pathway WP3958	43845	0.459723	1	0	0	1.65837	1.28877	PLCD1
Phytochemical activity on NRF2 transcriptional activation WP3	43845	0.459723	1	0	0	1.65837	1.28877	EPHB2
miRNAs involved in DNA damage response WP1545	43845	0.459723	1	0	0	1.65837	1.28877	ABL1
Retinoblastoma Gene in Cancer WP2446	31868	0.465222	1	0	0	1.14371	0.875212	ABL1;RAF1;TYMS;CDC25B
Endometrial cancer WP4155	23071	0.467502	1	0	0	1.18455	0.900676	RAF1;FGFR2;MAPK3
Endochondral Ossification WP474	23437	0.477905	1	0	0	1.16604	0.86094	CHST11;PTCH1;CTSV
Interactome of polycomb repressive complex 2 (PRC2) WP2916	43846	0.481459	1	0	0	1.55473	1.1364	STK38
Metabolic pathway of LDL, HDL and TG, including diseases WP4522	43846	0.481459	1	0	0	1.55473	1.1364	APOE
Osteoclast Signaling WP12	43846	0.481459	1	0	0	1.55473	1.1364	TNFRSF11A
ATM Signaling Pathway WP2516	14642	0.481852	1	0	0	1.24378	0.908108	NFKBIA;ABL1
Bladder Cancer WP2828	14642	0.481852	1	0	0	1.24378	0.908108	SRC;RAF1
IL-5 Signaling Pathway WP127	14642	0.481852	1	0	0	1.24378	0.908108	RAF1;MAPK3
Oxidative Damage WP3941	14642	0.481852	1	0	0	1.24378	0.908108	MAPK10;APAF1
Wnt Signaling WP428	5/115	0.493781	1	0	0	1.08155	0.76321	INVS;FZD5;FZD7;DVL2;ROR2
Human Thyroid Stimulating Hormone (TSH) signaling pathway WP2032	24167	0.49842	1	0	0	1.13071	0.787328	SRC;RAF1;MAPK3
GPCRs, Other WP117	33329	0.50023	1	0	0	1.09343	0.757408	SMO;CCKBR;FSHR;GPR83
Canonical and Non-Canonical TGF-B signaling WP3874	43847	0.502321	1	0	0	1.46327	1.00749	SMAD4
Drug Induction of Bile Acid Pathway WP2289	43847	0.502321	1	0	0	1.46327	1.00749	ABCB11
IL-9 Signaling Pathway WP22	43847	0.502321	1	0	0	1.46327	1.00749	MAPK3
Mitochondrial LC-Fatty Acid Beta-Oxidation WP368	43847	0.502321	1	0	0	1.46327	1.00749	EHHADH
Fas Ligand (FasL) pathway and Stress induction of Heat Shock Proteins (HSP) regulation WP314	15373	0.507768	1	0	0	1.18455	0.802809	APAF1;CASP10
PPAR signaling pathway WP3942	24532	0.508523	1	0	0	1.11383	0.753225	EHHADH;CPT1C;CPT1B
Corticotropin-releasing hormone signaling pathway WP2355	34060	0.517358	1	0	0	1.06992	0.705098	NFKBIA;GNB3;RAF1;MAPK3
DNA Damage Response WP707	24898	0.518518	1	0	0	1.09745	0.720786	APAF1;TLK2;ABL1
Vitamin A and Carotenoid Metabolism WP716	15738	0.520404	1	0	0	1.15701	0.755698	CRABP2;BCO1
Estrogen metabolism WP697	43848	0.522344	1	0	0	1.38198	0.897496	STS
Simplified Depiction of MYD88 Distinct Input-Output Pathway WP3877	43848	0.522344	1	0	0	1.38198	0.897496	IRAK1
Simplified Interaction Map Between LOXL4 and Oxidative Stress Pathway WP3670	43848	0.522344	1	0	0	1.38198	0.897496	EXOC6
LncRNA involvement in canonical Wnt signaling and colorectal cancer WP4258	34425	0.525819	1	0	0	1.05854	0.680426	FZD5;FZD7;DVL2;ROR2
AMP-activated Protein Kinase (AMPK) Signaling WP1403	25263	0.528403	1	0	0	1.08155	0.689916	PIK3C3;CPT1C;CPT1B
MAPK Signaling Pathway WP382	10/246	0.531122	1	0	0	1.0112	0.639853	IKBKB;DUSP4;NTRK1;MAPK10;RAC2;RAF1;DUSP6;FGFR2;CDC25B;MAPK3
NRF2 pathway WP2884	6/146	0.536525	1	0	0	1.02229	0.636518	SLC5A9;TXNRD3;NRG1;SLC39A2;PTGR1;PRDX6
Cell Differentiation - Index expanded WP2023	43849	0.541563	1	0	0	1.30924	0.802952	PAX7
Farnesoid X Receptor Pathway WP2879	43849	0.541563	1	0	0	1.30924	0.802952	ABCB11
Overview of nanoparticle effects WP3287	43849	0.541563	1	0	0	1.30924	0.802952	NFRKB
Serotonin Receptor 4/6/7 and NR3C Signaling WP734	43849	0.541563	1	0	0	1.30924	0.802952	MAPK3
Non-genomic actions of 1,25 dihydroxyvitamin D3 WP4341	25993	0.547827	1	0	0	1.05108	0.632537	IKBKB;PLCD1;MAPK3
miRNA Regulation of DNA Damage Response WP1530	25993	0.547827	1	0	0	1.05108	0.632537	APAF1;TLK2;ABL1
Aryl Hydrocarbon Receptor WP2586	16834	0.556989	1	0	0	1.08155	0.632933	SRC;RAF1
Selenium Metabolism and Selenoproteins WP28	16834	0.556989	1	0	0	1.08155	0.632933	SELENON;TXNRD3
Pathways Regulating Hippo Signaling WP4540	35886	0.558916	1	0	0	1.01533	0.590676	NTRK1;FLT1;CDH12;FGFR2
Nanomaterial induced apoptosis WP2507	43850	0.56001	1	0	0	1.24378	0.721145	APAF1
Mechanoregulation and pathology of YAP/TAZ via Hippo and non-Hippo mechanisms WP4534	17199	0.568734	1	0	0	1.05854	0.597377	MAPK10;SRC
Peptide GPCRs WP24	27089	0.576062	1	0	0	1.00847	0.556212	CCKBR;FSHR;CXCR4
Nicotine Activity on Dopaminergic Neurons WP1602	43851	0.577715	1	0	0	1.18455	0.649934	DRD2
Fatty Acid Biosynthesis WP357	43852	0.594709	1	0	0	1.13071	0.587611	ECHS1
Globo Sphingolipid Metabolism WP1424	43852	0.594709	1	0	0	1.13071	0.587611	ST6GALNAC2
NAD+ biosynthetic pathways WP3645	43852	0.594709	1	0	0	1.13071	0.587611	NADSYN1
Regulation of Apoptosis by Parathyroid Hormone-related Protein WP3872	43852	0.594709	1	0	0	1.13071	0.587611	BCL2L1
Transcription factor regulation in adipogenesis WP3599	43852	0.594709	1	0	0	1.13071	0.587611	IRS1
Vitamin D Receptor Pathway WP2877	7/182	0.600968	1	0	0	0.956755	0.487192	SERPINB1;LPGAT1;STS;TNFSF4;PRDM1;ATP2B1;KLK6
Metapathway biotransformation Phase I and II WP702	7/183	0.606752	1	0	0	0.951527	0.475416	GLYATL2;CYP4X1;GAL3ST1;CHST11;AKR1C3;INMT;HS3ST1
Blood Clotting Cascade WP272	43853	0.61102	1	0	0	1.08155	0.532799	VWF
Estrogen signaling pathway WP712	43853	0.61102	1	0	0	1.08155	0.532799	IKBKB
The human immune response to tuberculosis WP4197	43853	0.61102	1	0	0	1.08155	0.532799	IFNGR1
Copper homeostasis WP3286	19025	0.624049	1	0	0	0.956755	0.451136	ADAM17;SOD1
IL1 and megakaryocytes in obesity WP2865	43854	0.626675	1	0	0	1.03648	0.484378	IRAK1
miRNA regulation of p53 pathway in prostate cancer WP3982	43854	0.626675	1	0	0	1.03648	0.484378	APAF1
Phosphodiesterases in neuronal function WP4222	19391	0.634429	1	0	0	0.938703	0.427138	DRD2;ADCY7
Glycosylation and related congenital defects. WP4521	43855	0.6417	1	0	0	0.995025	0.441427	MOGS
Signal Transduction of S1P Receptor WP26	43855	0.6417	1	0	0	0.995025	0.441427	MAPK3
Pathogenic Escherichia coli infection WP2272	20121	0.654514	1	0	0	0.904568	0.383413	ABL1;ARPC5
PPAR Alpha Pathway WP2878	43856	0.656122	1	0	0	0.956755	0.403185	EHHADH
Wnt/beta-catenin Signaling Pathway in Leukemia WP3658	43856	0.656122	1	0	0	0.956755	0.403185	BCL9
Regulation of toll-like receptor signaling pathway WP1449	5/139	0.661792	1	0	0	0.894807	0.36938	NFKBIA;IKBKB;MAPK10;IRAK1;MAPK3
Pathways in clear cell renal cell carcinoma WP4018	31107	0.669666	1	0	0	0.877963	0.352043	FLT1;RAPGEF5;BAP1
Photodynamic therapy-induced unfolded protein response WP3613	43857	0.669964	1	0	0	0.921319	0.369018	PPP1R15A
Selenium Micronutrient Network WP15	31472	0.677377	1	0	0	0.867754	0.338014	SELENON;TXNRD3;SOD1
Statin Pathway WP430	43859	0.696	1	0	0	0.85778	0.310864	APOE
miRs in Muscle Cell Differentiation WP2012	43859	0.696	1	0	0	0.85778	0.310864	PAX7
Inflammatory Response Pathway WP453	43860	0.708239	1	0	0	0.829187	0.286048	ZAP70
Matrix Metalloproteinases WP129	43860	0.708239	1	0	0	0.829187	0.286048	MMP14
Oligodendrocyte Specification and differentiation(including remyelination), leading to Myelin Components for CNS WP4304	43860	0.708239	1	0	0	0.829187	0.286048	BMP4
One Carbon Metabolism WP241	43860	0.708239	1	0	0	0.829187	0.286048	TYMS
Trans-sulfuration and one carbon metabolism WP2525	43861	0.719985	1	0	0	0.802439	0.263621	TYMS
Genotoxicity pathway WP4286	23043	0.726113	1	0	0	0.789702	0.252744	GXYLT1;SMAD5
Constitutive Androstane Receptor Pathway WP2875	11689	0.731259	1	0	0	0.777363	0.243305	EHHADH
Development and heterogeneity of the ILC family WP3893	11689	0.731259	1	0	0	0.777363	0.243305	GATA3
Monoamine Transport WP727	11689	0.731259	1	0	0	0.777363	0.243305	NECTIN2
Ovarian Infertility Genes WP34	11689	0.731259	1	0	0	0.777363	0.243305	FSHR
Nuclear Receptors in Lipid Metabolism and Toxicity WP299	12055	0.74208	1	0	0	0.753807	0.22486	ABCB11
Pregnane X Receptor pathway WP2876	12055	0.74208	1	0	0	0.753807	0.22486	SRC
Prion disease pathway WP3995	12055	0.74208	1	0	0	0.753807	0.22486	MAPK3
Breast cancer pathway WP4262	5/154	0.746352	1	0	0	0.80765	0.236285	FZD5;FZD7;DVL2;RAF1;MAPK3
Folate Metabolism WP176	24139	0.749536	1	0	0	0.753807	0.217323	FOLR1;SOD1
Non-small cell lung cancer WP4255	24139	0.749536	1	0	0	0.753807	0.217323	RAF1;MAPK3
Histone Modifications WP2369	24504	0.756952	1	0	0	0.742556	0.206769	SETD1B;SMYD3
Photodynamic therapy-induced NF-kB survival signaling WP3617	12785	0.762433	1	0	0	0.710732	0.192779	IKBKB
Zinc homeostasis WP3529	13150	0.772	1	0	0	0.690989	0.178808	SLC39A2
Photodynamic therapy-induced HIF-1 survival signaling WP3614	13516	0.781182	1	0	0	0.672314	0.166026	BCL2L1
The effect of progerin on the involved genes in Hutchinson-Gilford Progeria Syndrome WP4320	13516	0.781182	1	0	0	0.672314	0.166026	CBX5
TGF-beta Signaling Pathway WP366	4/132	0.782139	1	0	0	0.753807	0.185227	SMAD4;SRC;TNC;RAF1
Nuclear Receptors WP170	13881	0.789995	1	0	0	0.654622	0.154313	NR0B1
Parkinsons Disease Pathway WP2371	13881	0.789995	1	0	0	0.654622	0.154313	APAF1
G13 Signaling Pathway WP524	14246	0.798453	1	0	0	0.637836	0.143564	MAPK10
Eukaryotic Transcription Initiation WP405	15707	0.829017	1	0	0	0.578503	0.108478	POLR2C
Integrated Cancer Pathway WP1971	16072	0.835905	1	0	0	0.565355	0.101334	CDC25B
ATM Signaling Network in Development and Disease WP3878	16438	0.842516	1	0	0	0.552792	0.0947275	DCLRE1C
Aryl Hydrocarbon Receptor Pathway WP2873	16803	0.848862	1	0	0	0.540774	0.0886109	SRC
Energy Metabolism WP1541	17168	0.854951	1	0	0	0.529269	0.0829421	UCP3
NO/cGMP/PKG mediated Neuroprotection WP4008	17168	0.854951	1	0	0	0.529269	0.0829421	NFKBIA
Differentiation Pathway WP2848	17533	0.860796	1	0	0	0.518242	0.0776834	BMP4
Exercise-induced Circadian Regulation WP410	17533	0.860796	1	0	0	0.518242	0.0776834	UCP3
Rett syndrome causing genes WP4312	17533	0.860796	1	0	0	0.518242	0.0776834	TBL1X
Cell Cycle WP179	3/120	0.865862	1	0	0	0.621891	0.0895707	SMAD4;ABL1;CDC25B
Photodynamic therapy-induced AP-1 survival signaling. WP3611	18264	0.871789	1	0	0	0.497512	0.0682627	BCL2L1
Synaptic signaling pathways associated with autism spectrum disorder WP4539	18264	0.871789	1	0	0	0.497512	0.0682627	MAPK3
Synaptic Vesicle Pathway WP2267	18629	0.876956	1	0	0	0.487757	0.0640419	SLC22A3
Androgen receptor signaling pathway WP138	32905	0.88178	1	0	0	0.552792	0.0695483	SMAD4;SRC
Translation Factors WP107	18994	0.881915	1	0	0	0.478377	0.0601128	EIF5
Amino Acid metabolism WP3925	33270	0.885552	1	0	0	0.546717	0.0664504	EHHADH;GLUL
mRNA Processing WP411	3/126	0.886532	1	0	0	0.592277	0.0713329	CPSF1;CELF1;CELF4
G Protein Signaling Pathways WP35	34001	0.892763	1	0	0	0.53496	0.0606825	GNB3;ADCY7
EGF/EGFR Signaling Pathway WP437	4/162	0.89482	1	0	0	0.614213	0.0682588	SRC;ABL1;RAF1;VAV2
GPCRs, Class A Rhodopsin-like WP455	7/257	0.895754	1	0	0	0.677546	0.0745906	GPR173;CCKBR;HTR1E;FSHR;CXCR4;GPR83;DRD2
Complement and Coagulation Cascades WP558	21186	0.907746	1	0	0	0.42889	0.0415124	VWF
Oxidative phosphorylation WP623	21916	0.915035	1	0	0	0.414594	0.0368129	ATP6AP1
Oxidation by Cytochrome P450 WP43	22282	0.918461	1	0	0	0.407797	0.0346855	CYP4X1
Prader-Willi and Angelman Syndrome WP3998	22282	0.918461	1	0	0	0.407797	0.0346855	MSX1
MECP2 and Associated Rett Syndrome WP3584	22647	0.921749	1	0	0	0.40122	0.0326924	FUT8
Proteasome Degradation WP183	22647	0.921749	1	0	0	0.40122	0.0326924	HLA-B
Lung fibrosis WP3624	23012	0.924904	1	0	0	0.394851	0.0308241	ELMOD2
G1 to S cell cycle control WP45	23377	0.927932	1	0	0	0.388682	0.029072	CREB3L1
Pathways Affected in Adenoid Cystic Carcinoma WP3651	23743	0.930839	1	0	0	0.382702	0.0274279	RAF1
Sterol Regulatory Element-Binding Proteins (SREBP) signalling WP1982	25204	0.94134	1	0	0	0.360516	0.0217937	GPAM
Calcium Regulation in the Cardiac Cell WP536	3/149	0.941824	1	0	0	0.500851	0.0300197	GNB3;ATP2B1;ADCY7
Nonalcoholic fatty liver disease WP4396	3/155	0.951424	1	0	0	0.481464	0.0239749	IKBKB;SOCS3;IRS1
Arrhythmogenic Right Ventricular Cardiomyopathy WP2118	27030	0.952255	1	0	0	0.336157	0.0164456	ITGA5
Myometrial Relaxation and Contraction Pathways WP289	3/156	0.952872	1	0	0	0.478377	0.0230934	GNB3;ADCY7;PLCD1
Spinal Cord Injury WP2431	2/118	0.953526	1	0	0	0.421621	0.0200642	CHST11;MAPK3
DNA IR-damage and cellular response via ATR WP4016	29221	0.962709	1	0	0	0.310945	0.0118171	CEP164
Allograft Rejection WP2328	32509	0.974264	1	0	0	0.279501	0.00728754	HLA-B
Human Complement System WP2806	35431	0.981493	1	0	0	0.25645	0.00479055	LRP2
Electron Transport Chain (OXPHOS system in mitochondria) WP111	1/103	0.985549	1	0	0	0.241511	0.00351545	UCP3

## Sheet: cluster 2
Term	Overlap	P-value	Adjusted P-value	Old P-value	Old Adjusted P-value	Odds Ratio	Combined Score	Genes
Heart Development WP1591	14/44	1.41808e-08	6.69335e-06	0	0	6.41496	115.927	MEF2C;SRF;GATA6;GATA4;TBX2;VEGFA;BMP2;HEY1;HAND2;TBX20;HAND1;CTNNB1;PITX2;FGF10
Striated Muscle Contraction Pathway WP383	14215	1.69601e-07	4.00259e-05	0	0	6.36672	99.256	TMOD1;ACTA2;MYL4;ACTC1;TNNC1;TPM2;TPM1;TNNI1;TNNI3;VIM;MYL9;TTN
Epithelial to mesenchymal transition in colorectal cancer WP4239	23/159	3.8238e-06	0.000601611	0	0	2.91641	36.3801	NOTCH2;NRP2;FZD2;JUP;TGFB3;FZD4;WNT5A;FN1;FZD8;HIF1A;DLK1;VTN;ZEB2;WNT11;CDH2;COL4A1;CTDSP1;PKP2;COL4A6;AKT1;COL4A5;SNAI2;CTNNB1
Mesodermal Commitment Pathway WP2857	20/147	3.98379e-05	0.00470087	0	0	2.74303	27.7888	FOXA1;SETD2;CRTC1;FZD4;SRF;LEF1;GATA6;FZD8;SMAD6;EMSY;PBX1;EXT1;MEIS1;HNF4A;HAND1;RARB;DIP2A;PITX2;BCORL1;JAK2
ESC Pluripotency Pathways WP3931	17/116	5.76208e-05	0.0054394	0	0	2.95467	28.8424	PDGFRB;PDGFRA;FZD2;FZD4;WNT5A;FZD8;SMAD9;LIFR;SMAD6;SMAD7;WNT11;SELENOP;AKT1;DVL3;CTNNB1;IL6ST;FGF10
Adipogenesis WP236	18/130	7.56317e-05	0.00594969	0	0	2.79156	26.4909	MEF2C;PTGIS;GADD45A;STAT2;NR2F1;LIFR;GATA4;HIF1A;DLK1;BMP2;BMP1;FRZB;NRIP1;CTNNB1;IL6ST;LPIN1;LPIN2;LPIN3
ncRNAs involved in Wnt signaling in hepatocellular carcinoma WP4336	14/86	8.02246e-05	0.00540943	0	0	3.28207	30.9522	TCF7L2;FZD2;RYK;CTNNBIP1;WNT5A;LEF1;FZD8;CXXC4;SFRP1;WNT11;SFRP5;DVL3;CTNNB1;SOX7
Myometrial Relaxation and Contraction Pathways WP289	20/156	9.31179e-05	0.00549396	0	0	2.58478	23.991	GUCY1A1;CAMK2D;NOS3;IGFBP3;ADCY6;RGS4;MYL4;ACTA2;RGS5;CREB3;CACNB3;GNG2;ACTC1;GRK5;GNAS;ACKR3;PRKD1;IGFBP6;PKIG;PRKACB
miR-509-3p alteration of YAP1/ECM axis WP3967	43999	0.000113194	0.00593637	0	0	7.11575	64.6566	COL1A1;EDNRA;COL3A1;COL5A1;FN1;SNAI2
Focal Adhesion WP306	23/198	0.000133474	0.00629996	0	0	2.34197	20.8941	PDGFRB;PDGFRA;SHC2;FN1;MYLK3;VEGFA;COL1A1;PPP1CB;VTN;MYL7;COL4A1;COL5A2;CAPN2;COL4A6;ITGA8;AKT1;CTNNB1;TLN2;FLNC;MYL9;DOCK1;BIRC2;ITGA9
Wnt Signaling WP428	16/115	0.000175887	0.00754714	0	0	2.80505	24.2515	TCF7L2;CAMK2D;FZD2;RYK;CTNNBIP1;WNT5A;LEF1;FZD8;CXXC4;SFRP1;WNT11;DAAM1;SFRP5;DVL3;CTNNB1;PLCB1
Cardiac Progenitor Differentiation WP2406	19633	0.000239804	0.00943227	0	0	3.80402	31.7091	PDGFRA;MEF2C;BMP1;ACTC1;TBX20;IGF2;GATA4;NCAM1;TNNI3;MYLK3
Pathways Regulating Hippo Signaling WP4540	14/98	0.000332373	0.0120677	0	0	2.88018	23.0681	PDGFRB;PDGFRA;NTRK2;TCF7L2;PRKAB2;LEF1;PRKAB1;CDH5;CDH2;GNAS;CTNNB1;TEK;PLCB1;PRKACB
miRNA targets in ECM and membrane receptors WP2911	44004	0.00055135	0.0185884	0	0	5.49853	41.2563	COL3A1;COL5A1;COL4A1;SDC2;COL5A2;FN1
LncRNA involvement in canonical Wnt signaling and colorectal cancer WP4258	13/94	0.000734721	0.0231192	0	0	2.78826	20.1202	TCF7L2;FZD2;RYK;CTNNBIP1;WNT5A;LEF1;FZD8;CXXC4;SFRP1;WNT11;SFRP5;DVL3;CTNNB1
Angiogenesis WP1539	44006	0.000913537	0.0269493	0	0	5.04032	35.2731	PDGFRA;NOS3;AKT1;TEK;HIF1A;VEGFA
TGF-B Signaling in Thyroid Cells for Epithelial-Mesenchymal Transition WP3859	43969	0.00148161	0.0411364	0	0	5.60036	36.4843	CDH2;FN1;AKT1;SNAI2;VIM
SRF and miRs in Smooth Muscle Differentiation and Proliferation WP1991	43932	0.00149955	0.0393217	0	0	7.33138	47.6729	CAMK2D;MEF2C;MYOCD;SRF
Wnt Signaling in Kidney Disease WP4150	13332	0.00170583	0.0423765	0	0	3.92025	24.9865	WNT11;FZD2;FZD4;WNT5A;DVL3;FZD8;CTNNB1
Canonical and Non-canonical Notch signaling WP3845	44009	0.00176916	0.0417522	0	0	4.48029	28.3927	NOTCH2;HEY1;LEF1;PSEN1;MAML3;DLK1
Ciliary landscape WP4352	21/216	0.00256165	0.0575762	0	0	1.96013	11.6963	BBS1;RALB;EXOC7;IFT140;RHBDD2;EXOC6B;HTRA2;IFT20;IFT74;MYL6;IFT88;PGRMC2;IFT81;TTC30A;RANBP10;CTNNB1;DVL3;VIM;YPEL5;CEP290;PAFAH1B1
BMP2-WNT4-FOXO1 Pathway in Human Primary Endometrial Stromal Cell Differentiation WP3876	43934	0.00300046	0.0643735	0	0	6.20347	36.0359	SFRP1;BMP2;SMAD9;CTNNB1
Mammary gland development pathway - Puberty (Stage 2 of 4) WP2814	43934	0.00300046	0.0615746	0	0	6.20347	36.0359	NRIP1;FN1;VIM;TIMP1
Calcium Regulation in the Cardiac Cell WP536	16/149	0.00300414	0.0590814	0	0	2.16497	12.5736	KCNJ5;CAMK2D;ADCY6;RGS4;RGS5;CACNB3;GNG2;GRK5;GJA5;GJA4;GNAS;ANXA6;PRKD1;PKIG;PRKACB;KCNJ3
Arrhythmogenic Right Ventricular Cardiomyopathy WP2118	27303	0.00346019	0.0653283	0	0	2.7245	15.4382	TCF7L2;CACNB3;CDH2;JUP;LEF1;DAG1;ITGA8;PKP2;CTNNB1;ITGA9
Ectoderm Differentiation WP2858	15/138	0.00355656	0.0645653	0	0	2.19144	12.3575	BCAS3;JUP;NUMA1;TSC22D1;FZD4;GATA6;FZD8;NR2F2;CELSR2;SERPINB6;PLCXD3;SGSM3;PLXNA2;CTNNB1;OGT
MicroRNA for Targeting Cancer Growth and Vascularization in Glioblastoma WP3593	43897	0.0036631	0.0640365	0	0	8.64055	48.4687	HEY1;HIF1A;VEGFA
Wnt Signaling Pathway WP363	19207	0.00384545	0.0648233	0	0	3.10174	17.2483	TCF7L2;RYK;LEF1;AKT1;TSC2;DVL3;CTNNB1;TEK
Endochondral Ossification WP474	23621	0.0041461	0.0674813	0	0	2.83518	15.5526	MEF2C;IFT88;FRZB;IHH;IGF2;AKT1;PLAT;SOX5;VEGFA
Genes related to primary cilium development (based on CRISPR) WP4536	12/103	0.00497955	0.0783448	0	0	2.34889	12.4548	IFT20;BBS1;IFT74;IFT88;IFT81;IFT140;TCTN1;CDK20;IQCE;CPLANE1;TXNDC15;FAM92A
Association Between Physico-Chemical Features and Toxicity Associated Pathways WP3680	24351	0.00510379	0.0777094	0	0	2.74927	14.51	WNT11;FZD2;DAAM1;ERBB4;FZD4;FN1;AKT1;FZD8;CTNNB1
Mammary gland development pathway - Embryonic development (Stage 1 of 4) WP2813	43936	0.00529146	0.078049	0	0	5.37634	28.181	SFRP1;ZEB2;ERBB4;AKT1
Hippo-Merlin Signaling Dysregulation WP4541	13/120	0.00657873	0.0940957	0	0	2.18414	10.9729	PDGFRB;PDGFRA;NTRK2;AMOT;PPP1CB;CDH5;CDH2;ITGA8;CTNNB1;TEK;PRKACB;AJUBA;ITGA9
Target Of Rapamycin (TOR) Signaling WP1471	13302	0.00796888	0.110627	0	0	3.36022	16.2373	PRKAB2;RRAGB;AKT1;TSC2;ULK2;PRKAB1
Integrated Breast Cancer Pathway WP1984	15/151	0.00814841	0.109887	0	0	2.00278	9.63322	CERK;GADD45A;DCAKD;TSC2;SMAD6;TFPI;RASGRP3;SMAD7;VEGFA;ZMIZ1;DAG1;AKT1;CTNNB1;TAB1;ZNF655
Metabolism of Spingolipids in ER and Golgi apparatus WP4142	43899	0.00815863	0.106969	0	0	6.72043	32.3164	B3GALNT1;B4GALT1;ST6GALNAC3
Wnt/beta-catenin Signaling Pathway in Leukemia WP3658	43977	0.00818716	0.104442	0	0	3.87717	18.6305	PYGO1;JUP;LEF1;AKT1;CTNNB1
Primary Focal Segmental Glomerulosclerosis FSGS WP2572	26543	0.00902439	0.112092	0	0	2.52016	11.8645	VTN;CDH2;DAG1;AKT1;PLCE1;COL4A5;CTNNB1;VIM;TLR4
Focal Adhesion-PI3K-Akt-mTOR-signaling pathway WP3932	25/303	0.00907619	0.109845	0	0	1.66347	7.82182	FOXA1;HIF1A;PIK3C2B;VTN;GNG2;AKT1;JAK2;PDGFRB;PDGFRA;NOS3;FN1;TSC2;EPOR;VEGFA;COL1A1;CREB3;COL3A1;COL5A1;COL4A1;COL5A2;COL4A6;ITGA8;TEK;FGF10;ITGA9
Chromosomal and microsatellite instability in colorectal cancer WP4216	26908	0.00985351	0.116271	0	0	2.48564	11.4835	TCF7L2;RALB;TGFB3;GADD45A;LEF1;REL;AKT1;CTNNB1;RALGDS
Notch Signaling Pathway WP61	22494	0.0101888	0.117295	0	0	2.6441	12.1271	NOTCH2;HEY1;NUMB;AKT1;MAML3;PSEN1;JAK2;HIF1A
Endoderm Differentiation WP2853	14/141	0.0104033	0.116914	0	0	2.00183	9.13961	FOXA1;CRTC1;LEF1;GATA6;GATA4;EMSY;PBX1;EXT1;SFRP1;DAB2;CTNNB1;DIP2A;BCORL1;SOX7
Wnt Signaling Pathway and Pluripotency WP399	11/102	0.0122704	0.134689	0	0	2.17426	9.56795	TCF7L2;FZD2;WNT11;FZD4;WNT5A;LEF1;DVL3;FZD8;CTNNB1;PRKD1;PAFAH1B1
Genotoxicity pathway WP4286	23224	0.0122924	0.131863	0	0	2.56016	11.2616	IKBIP;ARRDC4;ACTA2;BTG2;PRKAB2;DAAM1;GADD45A;PRKAB1
Apoptosis-related network due to altered Notch3 in ovarian cancer WP2864	19541	0.0152271	0.159716	0	0	2.66281	11.143	BEX3;CUL5;AKT1;PTK2B;TRAF1;VIM;SMAD7
Imatinib and Chronic Myeloid Leukemia WP3640	43941	0.0154246	0.15827	0	0	4.03226	16.8217	PDGFRB;PDGFRA;LYL1;GADD45A
TGF-beta Receptor Signaling WP560	19906	0.0167691	0.168404	0	0	2.6135	10.6846	ZEB2;BAMBI;LEF1;SMAD9;CTNNB1;SMAD6;SMAD7
Breast cancer pathway WP4262	14/154	0.0211111	0.207592	0	0	1.83284	7.07104	NOTCH2;TCF7L2;SHC2;FZD2;GADD45A;WNT5A;LEF1;FZD8;WNT11;HEY1;AKT1;DVL3;CTNNB1;FGF10
Endothelin Pathways WP2197	12175	0.0222235	0.214072	0	0	3.05474	11.6282	EDNRA;NOS3;GNAS;ECE1;PLCB1
Notch Signaling WP268	16589	0.0229025	0.216199	0	0	2.68817	10.1519	NOTCH2;KCNJ5;NUMB;DVL3;PSEN1;MAML3
MicroRNAs in cardiomyocyte hypertrophy WP1544	30926	0.0231596	0.21434	0	0	2.16014	8.13367	CAMK2D;FZD2;WNT5A;AKT1;CTNNB1;GATA4;TAB1;IL6ST;MYLK3
Pathways in clear cell renal cell carcinoma WP4018	31291	0.024805	0.225153	0	0	2.13472	7.89146	PDGFRB;PDGFRA;SETD2;TGFB3;AKT1;TSC2;CEP290;HIF1A;VEGFA
Brain-Derived Neurotrophic Factor (BDNF) signaling pathway WP2380	13/144	0.0269625	0.240119	0	0	1.82012	6.57664	NTRK2;MEF2C;SHC2;CRTC1;TSC2;BMP2;CDH2;AKT1;PTK2B;CTNNB1;NCAM1;JAK2;GRIA3
Osteoblast Signaling WP322	43904	0.0293838	0.256836	0	0	4.32028	15.239	PDGFRB;COL1A1;PDGFRA
Physiological and Pathological Hypertrophy of the Heart WP1528	43946	0.0331392	0.284395	0	0	3.22581	10.9904	CAMK2D;GATA4;LIFR;IL6ST
Hepatitis C and Hepatocellular Carcinoma WP3646	18050	0.033329	0.280916	0	0	2.46873	8.39696	FRZB;MYOF;LEF1;AKT1;HIF1A;VEGFA
Senescence and Autophagy in Cancer WP615	10/105	0.0355781	0.294611	0	0	1.92012	6.40558	SH3GLB1;COL1A1;VTN;BMP2;COL3A1;IFI16;IGFBP3;FN1;PLAT;IL6ST
Regulation of Actin Cytoskeleton WP51	13/150	0.0359206	0.292319	0	0	1.74731	5.81234	PDGFRB;PDGFRA;RDX;FN1;F2;FGD1;SSH1;PIK3C2B;VIL1;ABI2;MYH10;DOCK1;FGF10
Oncostatin M Signaling Pathway WP2374	23924	0.0414817	0.331853	0	0	2.17122	6.9099	AKT1;PTK2B;LIFR;JAK2;IL6ST;HIF1A;VEGFA
Pathways Affected in Adenoid Cystic Carcinoma WP3651	23924	0.0414817	0.326322	0	0	2.17122	6.9099	KDM6B;SMARCE1;SETD2;AKT1;MAML3;ARID1A;BCORL1
Thermogenesis WP4321	10/108	0.0419221	0.324381	0	0	1.86679	5.92134	SMARCE1;CREB3;PRKAB2;SMARCD3;GNAS;TSC2;ARID1A;PRKACB;PRKAB1;ADCY6
Metabolic pathway of LDL, HDL and TG, including diseases WP4522	43906	0.0420127	0.319838	0	0	3.78024	11.9826	ABCA1;APOA1;APOB
Hypothetical Craniofacial Development Pathway WP3655	43868	0.0437039	0.327432	0	0	5.76037	18.0318	TGFB3;ARHGAP29
Oxidative Damage WP3941	14732	0.0465002	0.342939	0	0	2.52016	7.73261	C5;GADD45A;TRAF3;TDP2;TRAF1
Amplification and Expansion of Oncogenic Pathways as Metastatic Traits WP3678	43907	0.0491885	0.357185	0	0	3.55787	10.7167	TCF7L2;LEF1;VEGFA
NOTCH1 regulation of human endothelial cell calcification WP3413	43907	0.0491885	0.351773	0	0	3.55787	10.7167	GJA5;PLAT;VEGFA
Regulation of Wnt/B-catenin Signaling by Small Molecule Compounds WP3664	43907	0.0491885	0.346522	0	0	3.55787	10.7167	LEF1;FZD8;CTNNB1
PI3K-Akt Signaling Pathway WP4172	24/340	0.0528181	0.366619	0	0	1.42315	4.18534	PDGFRB;PDGFRA;NTRK2;NOS3;IGF2;FN1;TSC2;EPOR;VEGFA;COL1A1;VTN;CREB3;GNG2;COL4A1;COL4A6;ITGA8;AKT1;COL4A5;COL6A6;TEK;JAK2;TLR4;FGF10;ITGA9
Lipid Metabolism Pathway WP3965	43950	0.0533133	0.364694	0	0	2.78087	8.15231	PRKAB2;AKT1;PRKACB;PRKAB1
Statin Pathway WP430	43950	0.0533133	0.359484	0	0	2.78087	8.15231	ABCA1;SOAT1;APOA1;APOB
miRs in Muscle Cell Differentiation WP2012	43950	0.0533133	0.354421	0	0	2.78087	8.15231	MEF2C;SRF;PRKD1;PRKACB
AMP-activated Protein Kinase (AMPK) Signaling WP1403	25385	0.0543969	0.356602	0	0	2.04535	5.95492	PRKAB2;HNF4A;AKT1;TSC2;PLCB1;PRKACB;PRKAB1
TNF related weak inducer of apoptosis (TWEAK) Signaling Pathway WP2036	15462	0.0555039	0.358875	0	0	2.40015	6.93957	TRAF3;AKT1;CTNNB1;TRAF1;BIRC2
Caloric restriction and aging WP4191	43869	0.0563899	0.359676	0	0	5.04032	14.4933	PRKAB2;AKT1
Extracellular vesicle-mediated signaling in recipient cells WP2870	43951	0.059197	0.372547	0	0	2.68817	7.59915	TGFB3;WNT5A;AKT1;CTNNB1
Inflammatory Response Pathway WP453	43951	0.059197	0.367645	0	0	2.68817	7.59915	COL1A1;VTN;COL3A1;FN1
Selenium Micronutrient Network WP15	31625	0.0631593	0.387158	0	0	1.87547	5.18022	ABCA1;PRDX2;SELENOP;DIO3;APOA1;PLAT;F2;APOB
Hedgehog Signaling Pathway WP4249	16193	0.0654419	0.396007	0	0	2.29106	6.24677	SUFU;IHH;GAS1;SPOPL;PRKACB
Hair Follicle Development: Cytodifferentiation (Part 3 of 3) WP2840	31990	0.0666852	0.398423	0	0	1.85391	5.01997	NOTCH2;SFRP1;LHX2;WNT5A;LEF1;GAS1;CTNNB1;CD34
Complement and Coagulation Cascades WP558	21337	0.0667226	0.393664	0	0	2.08565	5.6463	THBD;F10;PROS1;PLAT;F2;TFPI
Composition of Lipid Particles WP3601	43870	0.0701703	0.408893	0	0	4.48029	11.9034	APOA1;APOB
Cytosine methylation WP3585	43870	0.0701703	0.403907	0	0	4.48029	11.9034	TET3;TET2
Heme Biosynthesis WP561	43870	0.0701703	0.399041	0	0	4.48029	11.9034	ALAD;ALAS2
BMP Signaling Pathway in Eyelid Development WP3927	43910	0.0739659	0.415618	0	0	3.02419	7.87546	SFRP1;PITX2;FGF10
Hereditary leiomyomatosis and renal cell carcinoma pathway WP4206	43910	0.0739659	0.410728	0	0	3.02419	7.87546	PRKAB1;HIF1A;VEGFA
Ras Signaling WP4223	14/184	0.0742366	0.407438	0	0	1.53401	3.98919	PDGFRB;PDGFRA;NTRK2;SHC2;RALB;RASGRP3;GNG2;REL;AKT1;PLCE1;TEK;RGL1;PRKACB;RALGDS
VEGFA-VEGFR2 Signaling Pathway WP3888	17/236	0.079529	0.431468	0	0	1.4523	3.67668	MEF2C;NRP2;SHC2;NOS3;SRF;RHOC;VEGFA;AMOT;CDH5;BIN1;CAPN2;AKT1;TXNIP;CTNNB1;PTK2B;ACKR3;PRKD1
Glycerophospholipid Biosynthetic Pathway WP2533	43911	0.0832398	0.446468	0	0	2.88018	7.16022	PTPMT1;LPIN1;LPIN2
Interleukin-1 Induced Activation of NF-kappa-B WP3656	43871	0.0849055	0.450285	0	0	4.03226	9.94442	TIFA;AJUBA
BDNF-TrkB Signaling WP3676	12510	0.0859808	0.450922	0	0	2.37192	5.81981	NTRK2;TRPC3;AKT1;TSC2
Type 2 papillary renal cell carcinoma WP4241	12510	0.0859808	0.445967	0	0	2.37192	5.81981	SETD2;TGFB3;HIF1A;VEGFA
MECP2 and Associated Rett Syndrome WP3584	22798	0.0861538	0.442006	0	0	1.95109	4.78334	GAMT;MEF2C;TET3;TET2;IGF2;AKT1
Corticotropin-releasing hormone signaling pathway WP2355	34182	0.0903444	0.458522	0	0	1.7343	4.16949	CRHBP;JUP;NOS3;GNAS;AKT1;CTNNB1;ECE1;TLR4
Globo Sphingolipid Metabolism WP1424	43912	0.0929825	0.466891	0	0	2.74927	6.53045	B3GALNT1;ST6GALNAC3;ST3GAL1
PTF1A related regulatory pathway WP4147	43872	0.100467	0.499163	0	0	3.66569	8.42348	CTNNB1;FGF10
Synaptic signaling pathways associated with autism spectrum disorder WP4539	18384	0.100744	0.495327	0	0	2.01613	4.62736	NTRK2;PRKAB2;AKT1;TSC2;PRKAB1
Vitamin B12 Metabolism WP1533	18384	0.100744	0.49022	0	0	2.01613	4.62736	ABCA1;APOA1;PLAT;F2;APOB
Blood Clotting Cascade WP272	43913	0.103169	0.496896	0	0	2.62973	5.97314	F10;PLAT;F2
Nanoparticle triggered autophagic cell death WP2509	43913	0.103169	0.491876	0	0	2.62973	5.97314	SH3GLB1;TSC2;ULK2
Human Thyroid Stimulating Hormone (TSH) signaling pathway WP2032	24259	0.108359	0.511456	0	0	1.83284	4.07314	GNG2;GNAS;AKT1;JAK2;PLCB1;RALGDS
Photodynamic therapy-induced HIF-1 survival signaling WP3614	13606	0.109289	0.510737	0	0	2.1796	4.82511	TGFB3;IGFBP3;HIF1A;VEGFA
miRNAs involvement in the immune response in sepsis WP4329	13606	0.109289	0.50573	0	0	2.1796	4.82511	TRAF3;REL;TAB1;TLR4
IL1 and megakaryocytes in obesity WP2865	43914	0.113773	0.521369	0	0	2.52016	5.47769	SELENBP1;TIMP1;F2
Bone Morphogenic Protein (BMP) Signalling and Regulation WP1425	43873	0.116737	0.529806	0	0	3.36022	7.21718	BMP2;SMAD6
Nuclear Receptors WP170	13971	0.117626	0.528755	0	0	2.12224	4.54212	HNF4A;NR2F1;RARB;NR2F2
Phosphodiesterases in neuronal function WP4222	19480	0.121327	0.54025	0	0	1.90201	4.01184	GUCY1A1;PDE10A;PDE1C;PDE6B;ADCY6
Signal Transduction of S1P Receptor WP26	43915	0.124769	0.550382	0	0	2.41935	5.03539	AKT1;PLCB1;PIK3C2B
Sterol Regulatory Element-Binding Proteins (SREBP) signalling WP1982	25355	0.126754	0.553963	0	0	1.75316	3.62115	MBTPS1;PRKAB2;AKT1;LPIN1;PRKAB1;SEC31B
Neural Crest Differentiation WP2064	8/101	0.128475	0.556333	0	0	1.59693	3.27694	NOTCH2;CDH2;LHX2;HAND1;DVL3;SNAI2;CTNNB1;SOX5
Cell-type Dependent Selectivity of CCK2R Signaling WP3679	43874	0.133607	0.573295	0	0	3.10174	6.24334	DAGLA;PLCB1
Cell Differentiation - Index WP2029	43874	0.133607	0.568131	0	0	3.10174	6.24334	MEF2C;SRF
Ganglio Sphingolipid Metabolism WP1423	43874	0.133607	0.563058	0	0	3.10174	6.24334	ST3GAL5;ST3GAL1
Genes targeted by miRNAs in adipocytes WP1992	43874	0.133607	0.558075	0	0	3.10174	6.24334	SRF;HAND2
ncRNAs involved in STAT3 signaling in hepatocellular carcinoma WP4337	43874	0.133607	0.55318	0	0	3.10174	6.24334	IL6ST;JAK2
EPO Receptor Signaling WP581	43916	0.136129	0.55872	0	0	2.3263	4.63901	AKT1;JAK2;EPOR
Common Pathways Underlying Drug Addiction WP2636	15432	0.153526	0.624691	0	0	1.92012	3.59809	PPP1CB;GNAS;PRKACB;GRIA3
TLR4 Signaling and Tolerance WP3851	43918	0.159834	0.644798	0	0	2.16014	3.96088	TRAF3;TAB1;TLR4
IL-6 signaling pathway WP364	15797	0.163082	0.652327	0	0	1.87547	3.40117	AKT1;TIMP1;JAK2;IL6ST
GPR40 Pathway WP3958	43876	0.168758	0.669358	0	0	2.68817	4.78304	PLCE1;PLCB1
Role of Osx and miRNAs in tooth development WP3971	43876	0.168758	0.66378	0	0	2.68817	4.78304	NOTCH2;CTNNB1
PDGFR-beta pathway WP3972	43919	0.172124	0.671427	0	0	2.08565	3.66978	PDGFRB;SRF;JAK2
T-Cell Receptor and Co-stimulatory Signaling WP2583	43919	0.172124	0.665924	0	0	2.08565	3.66978	DYRK2;DYRK1A;AKT1
DNA Damage Response (only ATM dependent) WP710	8/110	0.179712	0.689626	0	0	1.46628	2.51672	TCF7L2;WNT11;WNT5A;LEF1;AKT1;DVL3;CTNNB1;PIK3C2B
EGF/EGFR Signaling Pathway WP437	11/162	0.181727	0.691734	0	0	1.36898	2.33445	MEF2C;RALB;SYNJ1;NOS3;INPPL1;AKT1;PLCE1;PTK2B;JAK2;RALGDS;PIK3C2B
Oligodendrocyte Specification and differentiation(including remyelination), leading to Myelin Components for CNS WP4304	43920	0.184672	0.697321	0	0	2.01613	3.4056	BMP2;NKX2-6;SOX5
PI3K-AKT-mTOR signaling pathway and therapeutic opportunities WP3844	43920	0.184672	0.691786	0	0	2.01613	3.4056	NOS3;AKT1;TSC2
Deregulation of Rab and Rab Effector Genes in Bladder Cancer WP2291	43877	0.186864	0.694487	0	0	2.52016	4.22725	RAB27A;TBC1D10A
Hedgehog Signaling Pathway WP47	43877	0.186864	0.689061	0	0	2.52016	4.22725	SUFU;IHH
IL17 signaling pathway WP2112	43921	0.19745	0.722452	0	0	1.95109	3.1652	TRAF3;AKT1;JAK2
Toll-like Receptor Signaling WP3858	43921	0.19745	0.716894	0	0	1.95109	3.1652	TRAF3;REL;TLR4
Tumor suppressor activity of SMARCB1 WP4204	43921	0.19745	0.711422	0	0	1.95109	3.1652	SMARCE1;SMARCD3;ARID1A
Endometrial cancer WP4155	23132	0.201889	0.721907	0	0	1.6001	2.56022	TCF7L2;GADD45A;LEF1;AKT1;CTNNB1
Canonical and Non-Canonical TGF-B signaling WP3874	43878	0.205221	0.728302	0	0	2.37192	3.75633	BMP1;LOXL1
Leptin Insulin Overlap WP3935	43878	0.205221	0.722867	0	0	2.37192	3.75633	AKT1;JAK2
Platelet-mediated interactions with vascular and circulating cells WP4462	43878	0.205221	0.717513	0	0	2.37192	3.75633	TGFB3;TLR4
TGF-beta Signaling Pathway WP366	9/132	0.208947	0.72517	0	0	1.37463	2.15223	MEF2C;EID2;DAB2;ZEB2;FN1;AKT1;WWP1;TAB1;SMAD7
Ovarian Infertility Genes WP34	11749	0.210432	0.724993	0	0	1.89012	2.94593	SMPD1;GJA4;NRIP1
Differentiation Pathway WP2848	17624	0.213732	0.731025	0	0	1.68011	2.59246	TGFB3;WNT5A;VEGFA;FGF10
Resistin as a regulator of inflammation WP4481	12114	0.223595	0.759257	0	0	1.83284	2.74545	AKT1;PLCE1;PLCB1
Simplified Depiction of MYD88 Distinct Input-Output Pathway WP3877	43879	0.223759	0.754386	0	0	2.24014	3.35392	TIFA;TLR4
Simplified Interaction Map Between LOXL4 and Oxidative Stress Pathway WP3670	43879	0.223759	0.749036	0	0	2.24014	3.35392	BMP2;FN1
Folate Metabolism WP176	24228	0.228939	0.760982	0	0	1.52737	2.2518	ABCA1;APOA1;PLAT;F2;APOB
Alzheimers Disease WP2059	30468	0.229373	0.75709	0	0	1.45744	2.14595	BACE1;CHPF2;CAPN2;PSEN1;APBB1;PLCB1
Spinal Cord Injury WP2431	8/118	0.231543	0.758947	0	0	1.36687	1.99971	C5;BTG2;COL4A1;GADD45A;PLXNA2;VIM;RHOC;TLR4
Integrin-mediated Cell Adhesion WP185	7/101	0.235059	0.765157	0	0	1.39732	2.0232	CAPN7;SELENOP;CAPN2;ITGA8;AKT1;DOCK1;ITGA9
Apoptosis WP254	30834	0.237558	0.767995	0	0	1.44009	2.06991	SCAF11;TRAF3;IGF2;AKT1;TRAF1;BIRC2
Cell Differentiation - Index expanded WP2023	43880	0.242414	0.778364	0	0	2.12224	3.00744	MEF2C;SRF
Extracellular vesicles in the crosstalk of cardiac cells WP4300	43880	0.242414	0.773105	0	0	2.12224	3.00744	GATA4;TLR4
Overview of nanoparticle effects WP3287	43880	0.242414	0.767916	0	0	2.12224	3.00744	COL4A1;FN1
Serotonin Receptor 4/6/7 and NR3C Signaling WP734	43880	0.242414	0.762797	0	0	2.12224	3.00744	SRF;GNAS
Photodynamic therapy-induced NF-kB survival signaling WP3617	12844	0.250361	0.782586	0	0	1.72811	2.39318	REL;BIRC2;VEGFA
Sudden Infant Death Syndrome (SIDS) Susceptibility Pathways WP706	10/158	0.259087	0.804534	0	0	1.27603	1.7234	NTRK2;MEF2C;VIPR2;CTNNB1;ECE1;ACADM;PRKACB;HIF1A;PBX1;VEGFA
Hypertrophy Model WP516	43881	0.261131	0.80558	0	0	2.01613	2.70712	ANKRD1;VEGFA
Serotonin Receptor 2 and ELK-SRF/GATA4 signaling WP732	43881	0.261131	0.800349	0	0	2.01613	2.70712	SRF;GATA4
LncRNA-mediated mechanisms of therapeutic resistance WP3672	43836	0.263077	0.801113	0	0	3.36022	4.48692	HIF1A
Robo4 and VEGF Signaling Pathways Crosstalk WP3943	43836	0.263077	0.795978	0	0	3.36022	4.48692	VEGFA
Somatroph axis (GH) and its relationship to dietary restriction and aging WP4186	43836	0.263077	0.790908	0	0	3.36022	4.48692	AKT1
mir-124 predicted interactions with cell cycle and differentiation WP3595	43836	0.263077	0.785902	0	0	3.36022	4.48692	CTDSP1
Zinc homeostasis WP3529	13210	0.263918	0.783456	0	0	1.68011	2.2381	SLC30A3;SLC39A5;SLC39A13
Non-genomic actions of 1,25 dihydroxyvitamin D3 WP4341	26054	0.276077	0.814427	0	0	1.41981	1.8274	CAMK2D;STAT2;PLCE1;PLCB1;TLR4
Fibrin Complement Receptor 3 Signaling Pathway WP4136	13575	0.277562	0.813723	0	0	1.6347	2.09521	AKT1;PLAT;TLR4
Pancreatic adenocarcinoma pathway WP4263	32660	0.279684	0.814882	0	0	1.35919	1.73173	RALB;TGFB3;GADD45A;AKT1;RALGDS;VEGFA
Neovascularisation processes WP4331	43882	0.279856	0.810381	0	0	1.92012	2.44524	SMAD9;AKT1
Hematopoietic Stem Cell Differentiation WP2849	20180	0.290387	0.835748	0	0	1.46628	1.81311	LYL1;LEF1;ACVR1B;CD34
RANKL/RANK (Receptor activator of NFKB (ligand)) Signaling Pathway WP2018	20180	0.290387	0.830682	0	0	1.46628	1.81311	TRAF3;AKT1;TRAF1;TAB1
Parkinsons Disease Pathway WP2371	13940	0.291271	0.828193	0	0	1.59168	1.96334	GPR37;HTRA2;UBE2J1
Chemokine signaling pathway WP3929	10/164	0.29686	0.839029	0	0	1.22935	1.49304	SHC2;GNG2;GRK5;STAT2;AKT1;PTK2B;JAK2;PLCB1;PRKACB;ADCY6
PI3K/AKT/mTOR - VitD3 Signalling WP4141	43883	0.298543	0.838765	0	0	1.83284	2.21562	TSC2;AKT1
Transcription factor regulation in adipogenesis WP3599	43883	0.298543	0.833802	0	0	1.83284	2.21562	NRIP1;LPIN1
EV release from cardiac cells and their functional effects WP3297	43837	0.29964	0.831941	0	0	2.88018	3.47112	ERBB4
Hfe effect on hepcidin production WP3924	43837	0.29964	0.827076	0	0	2.88018	3.47112	SMAD7
Ebola Virus Pathway on Host WP4217	8/129	0.309852	0.850293	0	0	1.25031	1.46494	REL;DAB2IP;AKT1;FLNC;RHOC;GAS6;TLR4;VPS16
G Protein Signaling Pathways WP35	34121	0.314505	0.858073	0	0	1.30073	1.50462	PDE1C;GNAS;PRKD1;PRKACB;ADCY6;KCNJ3
Estrogen signaling pathway WP712	43884	0.317151	0.860317	0	0	1.75316	2.01329	GNAS;AKT1
The human immune response to tuberculosis WP4197	43884	0.317151	0.8554	0	0	1.75316	2.01329	STAT2;JAK2
Nuclear Receptors Meta-Pathway WP2882	18/319	0.320415	0.859294	0	0	1.13763	1.29478	SLC26A2;NCOA6;SLC2A10;CAVIN2;PLK2;MYOF;APOA1;SLC39A13;THBD;SERTAD2;NRIP1;ANKRD1;SNAI2;SLC39A5;ACKR3;ACADM;CES2;BIRC2
Angiopoietin Like Protein 8 Regulatory Pathway WP3915	8/132	0.332159	0.885758	0	0	1.2219	1.3467	PRKAB2;SHC2;SESN3;EXOC7;MINK1;AKT1;TSC2;PRKAB1
Nucleotide-binding Oligomerization Domain (NOD) pathway WP1433	15036	0.332589	0.88192	0	0	1.47522	1.62399	CARD8;NOD1;AAMP
ApoE and miR-146 in inflammation and atherosclerosis WP3926	43838	0.33439	0.881743	0	0	2.52016	2.76071	TLR4
Dual hijack model of Vif in HIV infection WP3300	43838	0.33439	0.876844	0	0	2.52016	2.76071	CUL5
Effects of Nitric Oxide WP1995	43838	0.33439	0.872	0	0	2.52016	2.76071	NOS3
FTO Obesity Variant Mechanism WP3407	43838	0.33439	0.867209	0	0	2.52016	2.76071	IRX3
HIF1A and PPARG regulation of glycolysis WP2456	43838	0.33439	0.86247	0	0	2.52016	2.76071	HIF1A
Phase I biotransformations, non P450 WP136	43838	0.33439	0.857782	0	0	2.52016	2.76071	CES2
TFs Regulate miRNAs related to cardiac hypertrophy WP1559	43838	0.33439	0.853146	0	0	2.52016	2.76071	AKT1
Triacylglyceride Synthesis WP325	43885	0.335639	0.85173	0	0	1.68011	1.8342	AGPAT3;AGPAT4
Kit receptor signaling pathway WP304	21641	0.335767	0.847497	0	0	1.36687	1.49171	AKT1;SNAI2;JAK2;TBX2
MAPK Signaling Pathway WP382	14/246	0.337106	0.846352	0	0	1.14739	1.24762	PDGFRB;NTRK2;MEF2C;GADD45A;TGFB3;SRF;MAPK8IP3;RASGRP3;CACNB3;AKT1;FLNC;TAB1;PRKACB;FGF10
Splicing factor NOVA regulated synaptic proteins WP4148	15401	0.346363	0.86499	0	0	1.44009	1.52688	CDH2;CADM1;EPB41L3
Differentiation of white and brown adipocyte WP2895	43886	0.353976	0.879351	0	0	1.6129	1.67504	BMP2;SMAD9
IL-7 Signaling Pathway WP205	43886	0.353976	0.874747	0	0	1.6129	1.67504	AKT1;PTK2B
TYROBP Causal Network WP3945	22372	0.358594	0.881543	0	0	1.32205	1.35585	LYL1;MAF;HLX;LHFPL2
Degradation pathway of sphingolipids, including diseases WP4153	43839	0.367417	0.898554	0	0	2.24014	2.24296	HEXA
Supression of HMGB1 mediated inflammation by THBD WP4479	43839	0.367417	0.893922	0	0	2.24014	2.24296	THBD
PPAR Alpha Pathway WP2878	43887	0.37213	0.900745	0	0	1.55087	1.53305	APOA1;ACADM
Interleukin-11 Signaling Pathway WP2332	16132	0.373811	0.900198	0	0	1.37463	1.35265	AKT1;JAK2;IL6ST
Signaling Pathways in Glioblastoma WP2261	30072	0.384592	0.921458	0	0	1.22935	1.17473	PDGFRB;PDGFRA;AKT1;TSC2;PIK3C2B
Prostaglandin Synthesis and Regulation WP98	16497	0.387454	0.923628	0	0	1.34409	1.27441	EDNRA;PTGIS;ANXA6
Follicle Stimulating Hormone (FSH) signaling pathway WP2035	43888	0.390074	0.925201	0	0	1.49343	1.40594	AKT1;TSC2
Intraflagellar transport proteins binding to dynein WP4532	43888	0.390074	0.920575	0	0	1.49343	1.40594	IFT140;IFT81
Leptin and adiponectin WP3934	43840	0.398807	0.936503	0	0	2.01613	1.85338	PRKAB1
Mammary gland development pathway - Involution (Stage 4 of 4) WP2815	43840	0.398807	0.931867	0	0	2.01613	1.85338	IL6ST
Type III interferon signaling WP2113	43840	0.398807	0.927276	0	0	2.01613	1.85338	STAT2
Selenium Metabolism and Selenoproteins WP28	16862	0.401024	0.92786	0	0	1.31487	1.20144	SELENBP1;SELENOP;DIO3
Nanoparticle-mediated activation of receptor signaling WP2643	43889	0.407785	0.9389	0	0	1.44009	1.29178	COL1A1;FN1
Energy Metabolism WP1541	17227	0.414508	0.949747	0	0	1.28689	1.13332	MEF2C;PRKAB2;PRKAB1
Mechanoregulation and pathology of YAP/TAZ via Hippo and non-Hippo mechanisms WP4534	17227	0.414508	0.945159	0	0	1.28689	1.13332	ACTA2;ACTC1;CTNNB1
NO/cGMP/PKG mediated Neuroprotection WP4008	17227	0.414508	0.940615	0	0	1.28689	1.13332	CAMK2D;GUCY1A1;NOS3
AGE/RAGE pathway WP2324	24198	0.415422	0.938178	0	0	1.2219	1.07339	NOS3;AKT1;JAK2;HIF1A
Vitamin D Receptor Pathway WP2877	10/182	0.416223	0.935511	0	0	1.10776	0.970992	THBD;SFRP1;COL13A1;GADD45A;IGFBP3;TPM1;NRIP1;ID4;DACT2;HIF1A
Cannabinoid receptor signaling WP3869	43890	0.425241	0.951251	0	0	1.39043	1.18896	DAGLA;PRKACB
Histone Modifications WP2369	24563	0.426675	0.949956	0	0	1.20366	1.0252	KMT2D;SETD2;SETDB1;PRDM2
PPAR signaling pathway WP3942	24563	0.426675	0.945496	0	0	1.20366	1.0252	ACOX2;APOA1;ACADM;ACOX3
NAD metabolism, sirtuins and aging WP3630	43841	0.428641	0.945415	0	0	1.83284	1.55267	HIF1A
RAC1/PAK1/p38/MMP2 Pathway WP3303	24929	0.437872	0.961282	0	0	1.18596	0.979398	FN1;AKT1;CTNNB1;TEK
Allograft Rejection WP2328	32629	0.453739	0.991504	0	0	1.13266	0.895063	PDGFRA;C5;COL5A1;VIM;VEGFA
IL-10 Anti-inflammatory Signaling Pathway WP4495	43842	0.456996	0.99402	0	0	1.68011	1.31566	STAT2
Iron metabolism in placenta WP2007	43842	0.456996	0.98946	0	0	1.68011	1.31566	SLC40A1
Factors and pathways affecting insulin-like growth factor (IGF1)-Akt signaling WP3850	11355	0.45932	0.98995	0	0	1.30073	1.01198	AKT1;PRKAB1
Gastric Cancer Network 2 WP2363	11355	0.45932	0.98545	0	0	1.30073	1.01198	ATAD2;CTNNB1
Androgen receptor signaling pathway WP138	32994	0.46347	0.989855	0	0	1.12007	0.86135	SMARCE1;ZMIZ1;AKT1;CTNNB1;BMF
Apoptosis Modulation and Signaling WP1772	33359	0.473149	1	0	0	1.10776	0.828989	TRAF3;HTRA2;BMF;PRKD1;BIRC2
Mammary gland development pathway - Pregnancy and lactation (Stage 3 of 4) WP2817	11720	0.475912	1	0	0	1.26008	0.935637	ERBB4;JAK2
Copper homeostasis WP3286	19054	0.480226	1	0	0	1.16315	0.85317	BACE1;CCS;AKT1
TNF alpha Signaling Pathway WP231	33725	0.482771	1	0	0	1.09572	0.79792	REL;AKT1;TRAF1;TAB1;BIRC2
Dopamine metabolism WP2436	43843	0.483945	1	0	0	1.55087	1.12559	PRKACB
EDA Signalling in Hair Follicle Development WP3930	43843	0.483945	1	0	0	1.55087	1.12559	BMP1
Irinotecan Pathway WP229	43843	0.483945	1	0	0	1.55087	1.12559	CES2
MFAP5-mediated ovarian cancer cell motility and invasiveness WP3301	43843	0.483945	0.997477	0	0	1.55087	1.12559	TNNC1
Valproic acid pathway WP3871	43843	0.483945	0.99314	0	0	1.55087	1.12559	ACADSB
Nuclear Receptors in Lipid Metabolism and Toxicity WP299	12086	0.492191	1	0	0	1.2219	0.866189	ABCA1;RARB
Prion disease pathway WP3995	12086	0.492191	1	0	0	1.2219	0.866189	MEF2C;NCAM1
Signal transduction through IL1R WP4496	12086	0.492191	0.997056	0	0	1.2219	0.866189	TGFB3;TAB1
miRNA regulation of prostate cancer signaling pathways WP3981	12086	0.492191	0.992795	0	0	1.2219	0.866189	PDGFRB;CTNNB1
Interferon type I signaling pathways WP585	19784	0.505535	1	0	0	1.12007	0.764043	STAT2;REL;PDCD4
Signaling of Hepatocyte Growth Factor Receptor WP313	12451	0.508146	1	0	0	1.18596	0.802878	PTK2B;DOCK1
ERK Pathway in Huntington's Disease WP3853	43844	0.509558	1	0	0	1.44009	0.970926	NTRK2
H19 action Rb-E2F1 signaling and CDK-Beta-catenin activity WP3969	43844	0.509558	1	0	0	1.44009	0.970926	CTNNB1
Cardiac Hypertrophic Response WP2795	20149	0.517948	1	0	0	1.09971	0.723477	CAMK2D;AKT1;PRKD1
IL-1 signaling pathway WP195	20149	0.517948	1	0	0	1.09971	0.723477	REL;AKT1;TAB1
Pathogenic Escherichia coli infection WP2272	20149	0.517948	1	0	0	1.09971	0.723477	CTNNB1;ARHGEF2;TLR4
Leptin signaling pathway WP2034	27851	0.524599	1	0	0	1.06112	0.68455	NOS3;REL;AKT1;JAK2
B Cell Receptor Signaling Pathway WP23	35551	0.529877	1	0	0	1.03924	0.660033	MEF2C;SH3BP2;REL;AKT1;RASGRP3
Human Complement System WP2806	35551	0.529877	1	0	0	1.03924	0.660033	VTN;C5;F10;PROS1;APOA1
Classical pathway of steroidogenesis, including diseases WP4523	43845	0.533901	1	0	0	1.34409	0.843474	H6PD
GPCRs, Class C Metabotropic glutamate, pheromone WP501	43845	0.533901	1	0	0	1.34409	0.843474	GPRC5C
Phytochemical activity on NRF2 transcriptional activation WP3	43845	0.533901	1	0	0	1.34409	0.843474	MAF
Regulation of toll-like receptor signaling pathway WP1449	7/139	0.538342	1	0	0	1.01532	0.628747	TRAF3;TIFA;AKT1;TRAFD1;TAB1;SMAD6;TLR4
Circadian rhythm related genes WP3594	10/201	0.541963	1	0	0	1.00305	0.614425	CST3;PPP1CB;RAI1;MAGED1;CRTC1;UBC;NRIP1;ID4;DYRK1A;OGT
Type II interferon signaling (IFNG) WP619	13547	0.553997	1	0	0	1.0898	0.643632	STAT2;JAK2
SREBF and miR33 in cholesterol and lipid homeostasis WP2011	43846	0.557037	1	0	0	1.26008	0.737303	ABCA1
Amyotrophic lateral sclerosis (ALS) WP2447	13912	0.568593	1	0	0	1.06112	0.599099	CST3;CCS
RIG-I-like Receptor Signaling WP3865	21976	0.577347	1	0	0	1.00806	0.553741	DDX17;MAVS;TRAF3
ACE Inhibitor Pathway WP554	43847	0.579025	1	0	0	1.18596	0.648018	NOS3
Cells and Molecules involved in local acute inflammatory response WP4493	43847	0.579025	1	0	0	1.18596	0.648018	C5
Mitochondrial LC-Fatty Acid Beta-Oxidation WP368	43847	0.579025	1	0	0	1.18596	0.648018	ACADM
Serotonin and anxiety WP3947	43847	0.579025	1	0	0	1.18596	0.648018	TRPV1
PDGF Pathway WP2526	14277	0.58284	1	0	0	1.03391	0.558151	PDGFRB;SRF
ATM Signaling Pathway WP2516	14642	0.596736	1	0	0	1.00806	0.520444	GADD45A;TP53BP1
IL-5 Signaling Pathway WP127	14642	0.596736	1	0	0	1.00806	0.520444	AKT1;JAK2
4-hydroxytamoxifen, Dexamethasone, and Retinoic Acids Regulation of p27 Expression WP3879	43848	0.599924	1	0	0	1.12007	0.572304	AKT1
Inhibition of exosome biogenesis and secretion by Manumycin A in CRPC cells WP4301	43848	0.599924	1	0	0	1.12007	0.572304	RAB27A
TP53 Network WP1742	43849	0.619785	1	0	0	1.06112	0.507621	GADD45A
IL-2 Signaling Pathway WP49	15373	0.623478	1	0	0	0.960061	0.453573	AKT1;PTK2B
Vitamin A and Carotenoid Metabolism WP716	15738	0.636325	1	0	0	0.937734	0.423898	ALDH1A2;RARB
Nanomaterial induced apoptosis WP2507	43850	0.638662	1	0	0	1.00806	0.451996	HTRA2
Urea cycle and metabolism of amino groups WP497	43850	0.638662	1	0	0	1.00806	0.451996	GAMT
Non-small cell lung cancer WP4255	24167	0.642241	1	0	0	0.916422	0.405785	GADD45A;AKT1;RARB
Nicotine Activity on Dopaminergic Neurons WP1602	43851	0.656602	1	0	0	0.960061	0.403876	GNG2
T-Cell antigen Receptor (TCR) Signaling Pathway WP69	32964	0.658515	1	0	0	0.896057	0.374344	REL;AKT1;PTK2B;VIM
ATM Signaling Network in Development and Disease WP3878	16469	0.660983	1	0	0	0.896057	0.370992	TSC2;TP53BP1
ErbB Signaling Pathway WP673	33329	0.667038	1	0	0	0.886211	0.358834	SHC2;CAMK2D;ERBB4;AKT1
GPCRs, Other WP117	33329	0.667038	1	0	0	0.886211	0.358834	GPR162;ADGRD1;EDNRA;CELSR2
Aryl Hydrocarbon Receptor WP2586	16834	0.672799	1	0	0	0.876578	0.347395	NRIP1;VEGFA
Complement Activation WP545	43852	0.673652	1	0	0	0.916422	0.362025	C5
Regulation of Apoptosis by Parathyroid Hormone-related Protein WP3872	43852	0.673652	1	0	0	0.916422	0.362025	AKT1
Thymic Stromal LymphoPoietin (TSLP) Signaling Pathway WP2203	17199	0.684279	1	0	0	0.857927	0.325489	AKT1;JAK2
EBV LMP1 signaling WP262	43853	0.689857	1	0	0	0.876578	0.325448	TRAF1
Hippo-Yap signaling pathway WP4537	43853	0.689857	1	0	0	0.876578	0.325448	MINK1
NRF2-ARE regulation WP4357	43853	0.689857	1	0	0	0.876578	0.325448	MAF
Rett syndrome causing genes WP4312	17564	0.695426	1	0	0	0.840054	0.305133	MEF2C;TRRAP
GPCRs, Class B Secretin-like WP334	43854	0.705258	1	0	0	0.840054	0.29334	VIPR2
miRNA regulation of p53 pathway in prostate cancer WP3982	43854	0.705258	1	0	0	0.840054	0.29334	SESN3
IL-3 Signaling Pathway WP286	17930	0.706245	1	0	0	0.82291	0.286202	AKT1;JAK2
Photodynamic therapy-induced AP-1 survival signaling. WP3611	18295	0.716742	1	0	0	0.806452	0.26858	PDGFRA;BMF
Glycosylation and related congenital defects. WP4521	43855	0.719894	1	0	0	0.806452	0.265041	B4GALT1
Hypothesized Pathways in Pathogenesis of Cardiovascular Disease WP3668	43855	0.719894	1	0	0	0.806452	0.265041	LTBP2
One carbon metabolism and related pathways WP3940	19025	0.73679	1	0	0	0.775434	0.236859	GPX7;BCAT2
Eicosanoid Synthesis WP167	43857	0.747025	1	0	0	0.746714	0.217784	PTGIS
Sphingolipid pathway WP1422	43857	0.747025	1	0	0	0.746714	0.217784	CERK
IL-4 Signaling Pathway WP395	19756	0.755614	1	0	0	0.746714	0.209248	AKT1;JAK2
Toll-like Receptor Signaling Pathway WP75	4/103	0.757823	1	0	0	0.782963	0.21712	TRAF3;AKT1;TAB1;TLR4
Gastric Cancer Network 1 WP2361	43859	0.771531	1	0	0	0.695217	0.180325	CASTOR3
Selective expression of chemokine receptors during T-cell polarization WP4494	43859	0.771531	1	0	0	0.695217	0.180325	TGFB3
Matrix Metalloproteinases WP129	43860	0.782879	1	0	0	0.672043	0.164501	TIMP1
Viral Acute Myocarditis WP4298	30742	0.793256	1	0	0	0.720046	0.166769	DAG1;AKT1;TLR4
Ethanol effects on histone modifications WP3996	43861	0.793664	1	0	0	0.650364	0.150296	ALDH1A2
Constitutive Androstane Receptor Pathway WP2875	11689	0.803915	1	0	0	0.63004	0.137514	NCOA6
Initiation of transcription and translation elongation at the HIV-1 LTR WP3414	11689	0.803915	1	0	0	0.63004	0.137514	HEXIM1
Monoamine Transport WP727	11689	0.803915	1	0	0	0.63004	0.137514	TSC2
White fat cell differentiation WP4149	11689	0.803915	1	0	0	0.63004	0.137514	NR2F2
Insulin Signaling WP481	6/160	0.810896	1	0	0	0.756048	0.158479	SHC2;SRF;MINK1;INPPL1;AKT1;TSC2
Alpha 6 Beta 4 signaling pathway WP244	12055	0.813656	1	0	0	0.610948	0.125988	AKT1
Fluoropyrimidine Activity WP1601	12055	0.813656	1	0	0	0.610948	0.125988	CES2
Pregnane X Receptor pathway WP2876	12055	0.813656	1	0	0	0.610948	0.125988	NRIP1
Fatty Acid Beta Oxidation WP143	12420	0.822914	1	0	0	0.592979	0.115574	ACADM
Lung fibrosis WP3624	23043	0.826531	1	0	0	0.640041	0.121939	TIMP1;SMAD7
G1 to S cell cycle control WP45	23408	0.833148	1	0	0	0.63004	0.11501	CREB3;GADD45A
Melatonin metabolism and effects WP3298	13516	0.84802	1	0	0	0.5449	0.0898271	ECE1
The effect of progerin on the involved genes in Hutchinson-Gilford Progeria Syndrome WP4320	13516	0.84802	1	0	0	0.5449	0.0898271	LEF1
Sleep regulation WP3591	13881	0.855572	1	0	0	0.53056	0.0827592	CST3
G13 Signaling Pathway WP524	14246	0.86275	1	0	0	0.516956	0.0763187	PPP1CB
Parkin-Ubiquitin Proteasomal System pathway WP2359	25600	0.868264	1	0	0	0.576037	0.0813706	GPR37;UBE2J1
Bladder Cancer WP2828	14611	0.86957	1	0	0	0.504032	0.0704415	VEGFA
Ferroptosis WP4313	14611	0.86957	1	0	0	0.504032	0.0704415	SLC40A1
Glycogen Synthesis and Degradation WP500	14611	0.86957	1	0	0	0.504032	0.0704415	AGL
mRNA Processing WP411	4/126	0.876919	1	0	0	0.640041	0.0840632	NXF1;TMED10;RBM5;PSKH1
DNA Replication WP466	15342	0.882213	1	0	0	0.480031	0.0601583	UBC
Integrated Cancer Pathway WP1971	16072	0.893631	1	0	0	0.458211	0.0515315	AKT1
Prolactin Signaling Pathway WP2037	27791	0.89647	1	0	0	0.53056	0.057985	AKT1;JAK2
Glycolysis and Gluconeogenesis WP534	16438	0.898919	1	0	0	0.448029	0.0477432	MPC2
Aryl Hydrocarbon Receptor Pathway WP2873	16803	0.903943	1	0	0	0.438289	0.0442622	MYOF
Regulation of Microtubule Cytoskeleton WP2038	16803	0.903943	1	0	0	0.438289	0.0442622	AKT1
Tryptophan metabolism WP465	16803	0.903943	1	0	0	0.438289	0.0442622	ALDH1A2
DNA IR-damage and cellular response via ATR WP4016	29252	0.912035	1	0	0	0.504032	0.0464097	XPA;TP53BP1
Structural Pathway of Interleukin 1 (IL-1) WP2637	17899	0.91757	1	0	0	0.411455	0.0353962	TAB1
NRF2 pathway WP2884	4/146	0.935449	1	0	0	0.552364	0.0368588	SLC2A10;SLC39A5;SLC39A13;CES2
DNA IR-Double Strand Breaks (DSBs) and cellular response via ATM WP3959	20090	0.939301	1	0	0	0.366569	0.0229542	TP53BP1
Preimplantation Embryo WP3527	21186	0.947915	1	0	0	0.347608	0.0185936	PBX1
MET in type 1 papillary renal cell carcinoma WP4205	21551	0.950506	1	0	0	0.341717	0.0173458	AKT1
Nonalcoholic fatty liver disease WP4396	4/155	0.952395	1	0	0	0.520291	0.0253775	PRKAB2;AKT1;PRKAB1;SMAD7
Proteasome Degradation WP183	22647	0.957531	1	0	0	0.325182	0.0141119	UBC
T-Cell antigen Receptor (TCR) pathway during Staphylococcus aureus infection WP3863	22647	0.957531	1	0	0	0.325182	0.0141119	AKT1
DNA Damage Response WP707	24838	0.968734	1	0	0	0.29649	0.00941813	GADD45A
miRNA Regulation of DNA Damage Response WP1530	25934	0.973173	1	0	0	0.283962	0.00772176	GADD45A
Peptide GPCRs WP24	27030	0.976983	1	0	0	0.27245	0.00634422	EDNRA
Metapathway biotransformation Phase I and II WP702	4/183	0.982371	1	0	0	0.440684	0.00783813	NDST1;CHST14;KCNAB2;CHST3
Cell Cycle WP179	2/120	0.983998	1	0	0	0.336022	0.00542034	TGFB3;GADD45A
Retinoblastoma Gene in Cancer WP2446	31778	0.988151	1	0	0	0.231739	0.00276232	ZNF655
Amino Acid metabolism WP3925	33239	0.990341	1	0	0	0.221553	0.00215038	ACADM
GPCRs, Class A Rhodopsin-like WP455	3/257	0.999791	1	0	0	0.235346	4.91142e-05	EDNRA;GPR37;ACKR3

## Sheet: cluster 3
Term	Overlap	P-value	Adjusted P-value	Old P-value	Old Adjusted P-value	Odds Ratio	Combined Score	Genes
Cytoplasmic Ribosomal Proteins WP477	32/89	7.49695e-24	3.53856e-21	0	0	9.97366	531.073	RPL30;RPL32;RPL31;RPL34;RPL10A;RPS4Y1;RPL9;RPL6;RPS15A;RPL18A;RPL36;RPL14;RPL39;RPS10;RPS7;RPL23;RPL22;RPL35A;RPS3A;RPS25;RPS28;RPS27;RPS6KB1;RPS29;RPL24;RPL27;RPS20;RPL29;RPL28;RPS21;RPS24;RPS23
Genes related to primary cilium development (based on CRISPR) WP4536	12/103	0.000334348	0.0789061	0	0	3.23176	25.8648	OFD1;IFT52;ARL6;TCTN3;TMEM216;MKS1;TRAPPC11;CEP83;IFT27;TUBE1;BBS7;CEP44
One carbon metabolism and related pathways WP3940	19176	0.00250708	0.394447	0	0	3.73413	22.3624	BHMT;AHCYL1;GPX3;GSS;GAD1;CEPT1;BCAT1
Urea cycle and metabolism of amino groups WP497	43941	0.00511755	0.603871	0	0	5.54785	29.2653	CPS1;SMS;PYCR1;ALDH18A1
Kit receptor signaling pathway WP304	21732	0.00514934	0.486098	0	0	3.2911	17.3404	MAPK8;RPS6KB1;SHC1;BTK;SNAI1;PLCG1;CRKL
Amino Acid metabolism WP3925	33482	0.00551291	0.433682	0	0	2.74344	14.2677	BHMT;CPS1;GPT2;GSS;SMS;DLST;PYCR1;ALDH18A1;BCAT1
Translation Factors WP107	19146	0.0106937	0.721064	0	0	3.20068	14.525	EIF2B5;EIF2S3;EIF2AK1;EIF2AK3;PABPC1;EIF4B
Cysteine and methionine catabolism WP4504	43904	0.0126146	0.744262	0	0	5.94413	25.9931	BHMT;AHCYL1;GSS
MET in type 1 papillary renal cell carcinoma WP4205	21702	0.0191822	1	0	0	2.82094	11.1534	CDC42;NRAS;MAPK8;PLCG1;PTK2;CRKL
Leptin signaling pathway WP2034	27942	0.0195968	0.92497	0	0	2.55493	10.047	CDC42;MAPK8;RPS6KB1;SHC1;KPNA4;PLCG1;PTK2
B Cell Receptor Signaling Pathway WP23	35643	0.0238795	1	0	0	2.28777	8.54422	CDC42;MAPK8;SHC1;BTK;NFATC3;PIP5K1A;PLCG1;CRKL
Trans-sulfuration and one carbon metabolism WP2525	11414	0.0243403	0.957385	0	0	3.57926	13.2992	BHMT;AHCYL1;GSS;PSPH
BDNF-TrkB Signaling WP3676	12510	0.0329815	1	0	0	3.26344	11.1342	NRAS;RPS6KB1;SHC1;PLCG1
Type II diabetes mellitus WP1584	43912	0.0431597	1	0	0	3.78263	11.8882	MAPK8;SOCS4;PIK3R5
ErbB Signaling Pathway WP673	33420	0.0460627	1	0	0	2.13379	6.56727	NRAS;MAPK8;RPS6KB1;SHC1;PLCG1;PTK2;CRKL
Ethanol metabolism resulting in production of ROS by CYP2E1 WP4269	43871	0.0482017	1	0	0	5.54785	16.8231	MAPK8;MAFG
PDGF Pathway WP2526	14336	0.0508885	1	0	0	2.84505	8.4729	CDC42;MAPK8;SHC1;PLCG1
Serotonin Transporter Activity WP1455	43872	0.057536	1	0	0	5.0435	14.4009	PPP2CB;STX1A
Hypothesized Pathways in Pathogenesis of Cardiovascular Disease WP3668	43915	0.0595799	1	0	0	3.32871	9.38842	FBN3;MAPK8;SHC1
Metabolic reprogramming in colon cancer WP4290	15432	0.063731	1	0	0	2.64183	7.27319	DLST;PYCR1;ENO1;PSPH
Nanoparticle triggered regulated necrosis WP2513	43873	0.0674344	1	0	0	4.62321	12.4669	MAPK8;FTL
RalA downstream regulated genes WP2290	43873	0.0674344	1	0	0	4.62321	12.4669	CDC42;NRAS
EGF/EGFR Signaling Pathway WP437	10/162	0.0688862	1	0	0	1.7123	4.58091	CDC42;ERRFI1;MAPK8;RPS6KB1;SHC1;PLCG1;PTPN5;PTK2;CRKL;PLD2
Photodynamic therapy-induced unfolded protein response WP3613	43917	0.0719167	1	0	0	3.08214	8.11295	EDEM1;EIF2AK3;ATF4
MFAP5-mediated ovarian cancer cell motility and invasiveness WP3301	43874	0.0778442	1	0	0	4.26758	10.8953	PLCG1;PTK2
Nanoparticle-mediated activation of receptor signaling WP2643	43918	0.0784786	1	0	0	2.97206	7.56369	NRAS;MAPK8;PTK2
Selenium Metabolism and Selenoproteins WP28	16893	0.0832252	1	0	0	2.41211	5.997	RPL30;SELENOS;GPX3;TRNAU1AP
PDGFR-beta pathway WP3972	43919	0.0852912	1	0	0	2.86958	7.064	MAPK8;SHC1;PLCG1
Association Between Physico-Chemical Features and Toxicity Associated Pathways WP3680	24228	0.08925	1	0	0	2.10146	5.07778	MAPK8;SHC1;PLCG1;PTK2;PFN2
Extracellular vesicle-mediated signaling in recipient cells WP2870	43920	0.0923453	1	0	0	2.77393	6.6081	NRAS;PROM1;PIK3R5
Tryptophan catabolism leading to NAD+ production WP4210	43877	0.11166	1	0	0	3.46741	7.60157	AADAT;KYNU
Signaling of Hepatocyte Growth Factor Receptor WP313	12479	0.122785	1	0	0	2.44758	5.13335	MAPK8;PTK2;CRKL
TCA Cycle (aka Krebs or citric acid cycle) WP78	43879	0.135926	1	0	0	3.08214	6.15084	DLST;SDHC
Transcription co-factors SKI and SKIL protein partners WP4533	43879	0.135926	1	0	0	3.08214	6.15084	LATS1;MERTK
RANKL/RANK (Receptor activator of NFKB (ligand)) Signaling Pathway WP2018	20180	0.136127	1	0	0	2.0174	4.02304	CDC42;MAPK8;PLCG1;PTK2
Zinc homeostasis WP3529	13210	0.1392	1	0	0	2.3116	4.55811	SLC30A7;SLC30A9;SLC39A9
G13 Signaling Pathway WP524	14305	0.165089	1	0	0	2.13379	3.84353	CDC42;RPS6KB1;RHPN2
Vitamin B6-dependent and responsive disorders WP4228	43835	0.167729	1	0	0	5.54785	9.90515	PIGV
miR-517 relationship with ARCN1 and USP1 WP3596	43835	0.167729	1	0	0	5.54785	9.90515	ARCN1
mRNA Processing WP411	7/126	0.170274	1	0	0	1.54107	2.72823	SRPK2;RBM39;SRP54;SRSF4;SF3B1;RBMX;SRRM1
IL-5 Signaling Pathway WP127	14671	0.174015	1	0	0	2.08044	3.63789	RPS6KB1;SHC1;BTK
Glycerophospholipid Biosynthetic Pathway WP2533	43882	0.174154	1	0	0	2.64183	4.61743	PIP5K1A;CEPT1
Methionine De Novo and Salvage Pathway WP3580	43883	0.187254	1	0	0	2.52175	4.22467	BHMT;SMS
IL-2 Signaling Pathway WP49	15401	0.192254	1	0	0	1.98138	3.26717	RPS6KB1;SHC1;CRKL
Metastatic brain tumor WP2249	43836	0.19774	1	0	0	4.62321	7.4933	CDC42
Glutathione metabolism WP100	43884	0.200483	1	0	0	2.41211	3.87632	GPX3;GSS
IL-6 signaling pathway WP364	15766	0.201546	1	0	0	1.9353	3.09984	RPS6KB1;SHC1;NLK
DNA Damage Response (only ATM dependent) WP710	6/110	0.206052	1	0	0	1.51305	2.39006	CDC42;NRAS;MAPK8;SHC1;PIK3C2A;PIK3R5
Angiogenesis WP1539	43885	0.213816	1	0	0	2.3116	3.56597	PLCG1;PTK2
T-Cell antigen Receptor (TCR) Signaling Pathway WP69	32994	0.224487	1	0	0	1.54107	2.30226	CDC42;MAPK8;SHC1;PLCG1;CRKL
Disorders of the Krebs cycle WP4236	43837	0.22667	1	0	0	3.96275	5.88175	DLST
RAC1/PAK1/p38/MMP2 Pathway WP3303	24929	0.229694	1	0	0	1.63172	2.40027	NRAS;MAPK8;GRB14;PTK2
Glucuronidation WP698	43887	0.240695	1	0	0	2.13379	3.03899	UGDH;PGM3
Insulin signalling in human adipocytes (diabetic condition) WP3635	43838	0.254558	1	0	0	3.46741	4.74419	RPS6KB1
Insulin signalling in human adipocytes (normal condition) WP3634	43838	0.254558	1	0	0	3.46741	4.74419	RPS6KB1
NAD Biosynthesis II (from tryptophan) WP2485	43838	0.254558	1	0	0	3.46741	4.74419	KYNU
IL-3 Signaling Pathway WP286	17958	0.259134	1	0	0	1.69832	2.29343	MAPK8;SHC1;CRKL
MAPK Signaling Pathway WP382	11/246	0.275194	1	0	0	1.24037	1.60043	CDC42;NRAS;MAPK8;FGF8;RASA2;NFATC3;NLK;PTPN5;CACNG4;CRKL;ATF4
Mesodermal Commitment Pathway WP2857	7/147	0.280327	1	0	0	1.32092	1.67994	LATS1;TOX3;FGF8;SNAI1;NLK;PHF6;CUL4B
ATR Signaling WP3875	43839	0.281442	1	0	0	3.08214	3.90762	TOPBP1
Benzo(a)pyrene metabolism WP696	43839	0.281442	1	0	0	3.08214	3.90762	AKR1A1
Metabolism of Spingolipids in ER and Golgi apparatus WP4142	43839	0.281442	1	0	0	3.08214	3.90762	GALNT1
NLR Proteins WP288	43839	0.281442	1	0	0	3.08214	3.90762	MAPK8
Tgif disruption of Shh signaling WP3674	43839	0.281442	1	0	0	3.08214	3.90762	FGF8
Prolactin Signaling Pathway WP2037	27851	0.293478	1	0	0	1.45996	1.78984	MAPK8;RPS6KB1;SHC1;PTK2
Regulation of Actin Cytoskeleton WP51	7/150	0.297391	1	0	0	1.2945	1.56985	CDC42;NRAS;FGF8;PIP5K1A;PIK3C2A;PTK2;PIK3R5
Gamma-Glutamyl Cycle for the biosynthesis and degradation of glutathione, including diseases WP4518	43840	0.307358	1	0	0	2.77393	3.27252	GSS
Leptin and adiponectin WP3934	43840	0.307358	1	0	0	2.77393	3.27252	ADIPOR2
Liver X Receptor Pathway WP2874	43840	0.307358	1	0	0	2.77393	3.27252	NR1H3
Factors and pathways affecting insulin-like growth factor (IGF1)-Akt signaling WP3850	11355	0.308173	1	0	0	1.78963	2.10656	RPS6KB1;JKAMP
Gastric Cancer Network 2 WP2363	11355	0.308173	1	0	0	1.78963	2.10656	RAD17;FAM91A1
Tumor suppressor activity of SMARCB1 WP4204	11355	0.308173	1	0	0	1.78963	2.10656	EED;DPF2
IL-4 Signaling Pathway WP395	19784	0.308568	1	0	0	1.54107	1.81201	IL4R;RPS6KB1;SHC1
Interferon type I signaling pathways WP585	19784	0.308568	1	0	0	1.54107	1.81201	RPS6KB1;EIF4B;CRKL
DNA IR-Double Strand Breaks (DSBs) and cellular response via ATM WP3959	20149	0.318516	1	0	0	1.51305	1.73105	LATS1;KAT5;RAD17
Monoamine Transport WP727	11720	0.321575	1	0	0	1.7337	1.96693	PPP2CB;STX1A
Nonalcoholic fatty liver disease WP4396	7/155	0.326292	1	0	0	1.25274	1.40302	CDC42;MAPK8;EIF2AK3;NR1H3;SDHC;ADIPOR2;ATF4
Gene regulatory network modelling somitogenesis WP2854	43841	0.33234	1	0	0	2.52175	2.77795	FGF8
Methionine metabolism leading to Sulphur Amino Acids and related disorders WP4292	43841	0.33234	1	0	0	2.52175	2.77795	BHMT
Alpha 6 Beta 4 signaling pathway WP244	12086	0.334912	1	0	0	1.68117	1.83901	SHC1;PTK2
Signaling Pathways in Glioblastoma WP2261	30042	0.342687	1	0	0	1.35313	1.44912	ERRFI1;NRAS;PLCG1;PIK3C2A
Ras Signaling WP4223	8/184	0.345509	1	0	0	1.20605	1.28172	CDC42;NRAS;MAPK8;SHC1;RASA2;CALML4;PLCG1;PLD2
p38 MAPK Signaling Pathway WP400	12451	0.34817	1	0	0	1.63172	1.72157	CDC42;SHC1
Alanine and aspartate metabolism WP106	43842	0.356423	1	0	0	2.3116	2.38474	GAD1
Target Of Rapamycin (TOR) Signaling WP1471	13181	0.374404	1	0	0	1.54107	1.51398	CDC42;RPS6KB1
Selenium Micronutrient Network WP15	31503	0.375649	1	0	0	1.2902	1.26323	PRDX3;SELENOS;GPX3;KYNU
Chemokine signaling pathway WP3929	7/164	0.379232	1	0	0	1.18399	1.14801	CDC42;NRAS;SHC1;PTK2;CXCL5;CRKL;PIK3R5
Ectoderm Differentiation WP2858	6/138	0.379494	1	0	0	1.20605	1.16857	TOX3;KCNK10;C1GALT1;MKS1;NLK;MYORG
Cell Differentiation - Index WP2029	43843	0.379637	1	0	0	2.13379	2.06666	TLX1
Dopamine metabolism WP2436	43843	0.379637	1	0	0	2.13379	2.06666	PPP2CB
EDA Signalling in Hair Follicle Development WP3930	43843	0.379637	1	0	0	2.13379	2.06666	EDARADD
Kennedy pathway from Sphingolipids WP3933	43843	0.379637	1	0	0	2.13379	2.06666	CEPT1
Transcriptional cascade regulating adipogenesis WP4211	43843	0.379637	1	0	0	2.13379	2.06666	CEBPG
Regulation of toll-like receptor signaling pathway WP1449	6/139	0.385959	1	0	0	1.19738	1.13993	MAPK8;BTK;TMED7;CTNNAL1;RNF41;PIK3R5
Genotoxicity pathway WP4286	23071	0.397706	1	0	0	1.32092	1.21794	AMER1;RPS27;DCP1B
Wnt Signaling WP428	5/115	0.400179	1	0	0	1.20605	1.10456	MAPK8;CSNK2A2;NFATC3;NLK;SENP2
Androgen receptor signaling pathway WP138	32964	0.408459	1	0	0	1.23286	1.10385	CDC42;KAT5;ZNF318;PTK2
Brain-Derived Neurotrophic Factor (BDNF) signaling pathway WP2380	6/144	0.418247	1	0	0	1.1558	1.00749	CDC42;GRIP1;MAPK8;RPS6KB1;SHC1;PLCG1
Biogenic Amine Synthesis WP550	43845	0.423588	1	0	0	1.84928	1.58852	GAD1
Cholesterol Biosynthesis Pathway WP197	43845	0.423588	1	0	0	1.84928	1.58852	SC5D
GPR40 Pathway WP3958	43845	0.423588	1	0	0	1.84928	1.58852	PLCG1
Phytochemical activity on NRF2 transcriptional activation WP3	43845	0.423588	1	0	0	1.84928	1.58852	MAPK8
Ferroptosis WP4313	14642	0.425479	1	0	0	1.38696	1.18522	GSS;FTL
Glycogen Synthesis and Degradation WP500	14642	0.425479	1	0	0	1.38696	1.18522	PPP2CB;PHKG2
Microglia Pathogen Phagocytosis Pathway WP3937	14642	0.425479	1	0	0	1.38696	1.18522	FCER1G;PIK3C2A
AGE/RAGE pathway WP2324	24167	0.42684	1	0	0	1.26088	1.07344	CDC42;MAPK8;SHC1
Non-small cell lung cancer WP4255	24167	0.42684	1	0	0	1.26088	1.07344	EML4;NRAS;PLCG1
NRF2 pathway WP2884	6/146	0.431114	1	0	0	1.13997	0.959151	DNAJB1;SLC39A9;GPX3;MAFG;CES3;FTL
Cell Cycle WP179	5/120	0.435897	1	0	0	1.1558	0.959719	CDC23;ANAPC4;SKP2;E2F5;CDC14A
Deregulation of Rab and Rab Effector Genes in Bladder Cancer WP2291	43846	0.444384	1	0	0	1.7337	1.40615	EXPH5
Interactome of polycomb repressive complex 2 (PRC2) WP2916	43846	0.444384	1	0	0	1.7337	1.40615	EED
Osteoclast Signaling WP12	43846	0.444384	1	0	0	1.7337	1.40615	MAPK8
SREBF and miR33 in cholesterol and lipid homeostasis WP2011	43846	0.444384	1	0	0	1.7337	1.40615	NR1H3
TCA Cycle and Deficiency of Pyruvate Dehydrogenase complex (PDHc) WP2453	43846	0.444384	1	0	0	1.7337	1.40615	DLST
AMP-activated Protein Kinase (AMPK) Signaling WP1403	25263	0.455463	1	0	0	1.20605	0.94849	CRTC2;RPS6KB1;ADIPOR2
Canonical and Non-Canonical TGF-B signaling WP3874	43847	0.46443	1	0	0	1.63172	1.25144	MAPK8
Parkin-Ubiquitin Proteasomal System pathway WP2359	25628	0.464872	1	0	0	1.18883	0.910633	PSMD10;CASK;TUBA8
Heart Development WP1591	16103	0.474292	1	0	0	1.26088	0.940526	FGF8;NFATC3
VEGFA-VEGFR2 Signaling Pathway WP3888	9/236	0.479635	1	0	0	1.05785	0.777235	CDC42;MAPK8;RPS6KB1;SHC1;MYO6;EIF2AK3;PLCG1;PTK2;ATF4
Breast cancer pathway WP4262	6/154	0.481991	1	0	0	1.08075	0.788764	NRAS;FGF8;RPS6KB1;SHC1;CSNK2A2;CETN3
Primary Focal Segmental Glomerulosclerosis FSGS WP2572	26359	0.483469	1	0	0	1.1558	0.840001	PLCG1;PTK2;LIMS1
Inhibition of exosome biogenesis and secretion by Manumycin A in CRPC cells WP4301	43848	0.483753	1	0	0	1.54107	1.11909	NRAS
TGF-B Signaling in Thyroid Cells for Epithelial-Mesenchymal Transition WP3859	43848	0.483753	1	0	0	1.54107	1.11909	SNAI1
Notch Signaling WP268	16469	0.4861	1	0	0	1.23286	0.88931	APH1A;DTX3
Regulation of Microtubule Cytoskeleton WP2038	16834	0.497741	1	0	0	1.20605	0.841435	CDC42;PHLDB2
Tryptophan metabolism WP465	16834	0.497741	1	0	0	1.20605	0.841435	AADAT;KYNU
Cell Differentiation - Index expanded WP2023	43849	0.502381	1	0	0	1.45996	1.00503	TLX1
Overview of nanoparticle effects WP3287	43849	0.502381	1	0	0	1.45996	1.00503	PTK2
Mechanoregulation and pathology of YAP/TAZ via Hippo and non-Hippo mechanisms WP4534	17199	0.509211	1	0	0	1.18039	0.796638	LATS1;MAPK8
Thymic Stromal LymphoPoietin (TSLP) Signaling Pathway WP2203	17199	0.509211	1	0	0	1.18039	0.796638	MAPK8;BTK
Angiopoietin Like Protein 8 Regulatory Pathway WP3915	5/132	0.519179	1	0	0	1.05073	0.688759	MAPK8;RPS6KB1;SHC1;NR1H3;PIK3C2A
TGF-beta Signaling Pathway WP366	5/132	0.519179	1	0	0	1.05073	0.688759	CDC42;MAPK8;SHC1;E2F5;PTK2
Imatinib and Chronic Myeloid Leukemia WP3640	43850	0.520337	1	0	0	1.38696	0.906073	SKP2
Serotonin Receptor 2 and ELK-SRF/GATA4 signaling WP732	43850	0.520337	1	0	0	1.38696	0.906073	NRAS
Differentiation Pathway WP2848	17564	0.520509	1	0	0	1.1558	0.754678	FGF8;FST
Exercise-induced Circadian Regulation WP410	17564	0.520509	1	0	0	1.1558	0.754678	PPP2CB;CBX3
Focal Adhesion-PI3K-Akt-mTOR-signaling pathway WP3932	11/303	0.533775	1	0	0	1.00704	0.632198	PPP2CB;NRAS;CRTC2;FGF8;IL4R;RPS6KB1;PIK3C2A;PTK2;EIF4B;ATF4;PIK3R5
Neovascularisation processes WP4331	43851	0.537646	1	0	0	1.32092	0.819702	MAPK8
Synaptic signaling pathways associated with autism spectrum disorder WP4539	18295	0.542576	1	0	0	1.10957	0.67842	NRAS;RPS6KB1
Synaptic Vesicle Pathway WP2267	18660	0.553342	1	0	0	1.08781	0.643745	STX3;STX1A
Transcription factor regulation in adipogenesis WP3599	43852	0.554331	1	0	0	1.26088	0.743907	MAPK8
Wnt Signaling Pathway WP363	19025	0.563927	1	0	0	1.06689	0.611149	MAPK8;NLK
EBV LMP1 signaling WP262	43853	0.570415	1	0	0	1.20605	0.677068	MAPK8
Hippo-Yap signaling pathway WP4537	43853	0.570415	1	0	0	1.20605	0.677068	LATS1
NRF2-ARE regulation WP4357	43853	0.570415	1	0	0	1.20605	0.677068	MAPK8
Nanoparticle triggered autophagic cell death WP2509	43853	0.570415	1	0	0	1.20605	0.677068	BECN1
Apoptosis-related network due to altered Notch3 in ovarian cancer WP2864	19391	0.574331	1	0	0	1.04676	0.580482	RPS6KB1;PTK2
Endoderm Differentiation WP2853	5/141	0.578042	1	0	0	0.983661	0.539154	TOX3;PABPC1;NLK;PHF6;CUL4B
GPCRs, Class B Secretin-like WP334	43854	0.58592	1	0	0	1.1558	0.61786	VIPR1
Photodynamic therapy-induced NFE2L2 (NRF2) survival signaling WP3612	43854	0.58592	1	0	0	1.1558	0.61786	MAPK8
IL-1 signaling pathway WP195	20121	0.594592	1	0	0	1.0087	0.524403	MAPK8;PLCG1
Pathogenic Escherichia coli infection WP2272	20121	0.594592	1	0	0	1.0087	0.524403	CDC42;TUBA8
Pyrimidine metabolism WP4022	31107	0.595824	1	0	0	0.979032	0.506953	NME7;POLR3D;CTPS2
Differentiation of white and brown adipocyte WP2895	43855	0.600865	1	0	0	1.10957	0.565198	CEBPG
MTHFR deficiency WP4288	43855	0.600865	1	0	0	1.10957	0.565198	BHMT
Physiological and Pathological Hypertrophy of the Heart WP1528	43855	0.600865	1	0	0	1.10957	0.565198	MAPK8
ncRNAs involved in Wnt signaling in hepatocellular carcinoma WP4336	31472	0.603782	1	0	0	0.967648	0.48822	CSNK2A2;SENP2;NLK
Hair Follicle Development: Cytodifferentiation (Part 3 of 3) WP2840	31837	0.611636	1	0	0	0.956526	0.470246	FST;PROM1;DSC2
EPO Receptor Signaling WP581	43856	0.615272	1	0	0	1.06689	0.518181	SHC1
PPAR Alpha Pathway WP2878	43856	0.615272	1	0	0	1.06689	0.518181	NR1H3
Pancreatic adenocarcinoma pathway WP4263	32568	0.627027	1	0	0	0.935031	0.43644	CDC42;MAPK8;RPS6KB1
Eicosanoid Synthesis WP167	43857	0.629159	1	0	0	1.02738	0.476058	LTA4H
Follicle Stimulating Hormone (FSH) signaling pathway WP2035	43857	0.629159	1	0	0	1.02738	0.476058	RPS6KB1
Intraflagellar transport proteins binding to dynein WP4532	43857	0.629159	1	0	0	1.02738	0.476058	IFT27
RIG-I-like Receptor Signaling WP3865	21947	0.642053	1	0	0	0.924642	0.409695	MAPK8;TRIM25
TLR4 Signaling and Tolerance WP3851	43858	0.642546	1	0	0	0.990688	0.438198	TRAM1
TNF alpha Signaling Pathway WP231	33664	0.649318	1	0	0	0.904541	0.390611	NRAS;MAPK8;NSMAF
Metapathway biotransformation Phase I and II WP702	6/183	0.65013	1	0	0	0.909484	0.391608	CHST9;GPX3;GSTO1;GSS;AKR1A1;GAL3ST4
Cannabinoid receptor signaling WP3869	43859	0.65545	1	0	0	0.956526	0.404068	MAPK8
MAPK Cascade WP422	43859	0.65545	1	0	0	0.956526	0.404068	NRAS
Selective expression of chemokine receptors during T-cell polarization WP4494	43859	0.65545	1	0	0	0.956526	0.404068	IL4R
Statin Pathway WP430	43859	0.65545	1	0	0	0.956526	0.404068	APOC1
T-Cell Receptor and Co-stimulatory Signaling WP2583	43859	0.65545	1	0	0	0.956526	0.404068	PLCG1
Corticotropin-releasing hormone signaling pathway WP2355	34029	0.656533	1	0	0	0.894815	0.376522	MAPK8;PLCG1;PTK2
MECP2 and Associated Rett Syndrome WP3584	22678	0.659772	1	0	0	0.894815	0.372119	GAD1;POU3F2
Proteasome Degradation WP183	22678	0.659772	1	0	0	0.894815	0.372119	PSMD10;PSMA1
LncRNA involvement in canonical Wnt signaling and colorectal cancer WP4258	34394	0.663642	1	0	0	0.885295	0.362982	CSNK2A2;SENP2;NLK
Ciliary landscape WP4352	7/216	0.665363	1	0	0	0.898957	0.366255	IFT52;MKS1;EXOC4;IFT27;MYL6B;BBS7;RPGR
Myometrial Relaxation and Contraction Pathways WP289	5/156	0.666884	1	0	0	0.889079	0.3602	CNN2;RGS2;GSTO1;PLCG1;ATF4
Dopaminergic Neurogenesis WP2855	43860	0.667889	1	0	0	0.924642	0.373216	FGF8
Inflammatory Response Pathway WP453	43860	0.667889	1	0	0	0.924642	0.373216	IL4R
One Carbon Metabolism WP241	43860	0.667889	1	0	0	0.924642	0.373216	BHMT
PI3K-AKT-mTOR signaling pathway and therapeutic opportunities WP3844	43860	0.667889	1	0	0	0.924642	0.373216	NRAS
GABA receptor Signaling WP4159	43861	0.67988	1	0	0	0.894815	0.345254	GAD1
Oncostatin M Signaling Pathway WP2374	23774	0.685021	1	0	0	0.853515	0.32289	MAPK8;SHC1
Ebola Virus Pathway on Host WP4217	4/129	0.688151	1	0	0	0.860132	0.321472	CDC42;PRKRA;RASA2;MERTK
Insulin Signaling WP481	5/160	0.688389	1	0	0	0.866852	0.323683	MAPK8;GRB14;RPS6KB1;SHC1;PIK3C2A
Initiation of transcription and translation elongation at the HIV-1 LTR WP3414	11689	0.691438	1	0	0	0.866852	0.319852	NFATC3
White fat cell differentiation WP4149	11689	0.691438	1	0	0	0.866852	0.319852	NR1H3
Histone Modifications WP2369	24504	0.700986	1	0	0	0.828037	0.294175	EED;KMT5A
Nuclear Receptors in Lipid Metabolism and Toxicity WP299	12055	0.70258	1	0	0	0.840583	0.296723	NR1H3
Oxidative Stress WP408	12055	0.70258	1	0	0	0.840583	0.296723	GPX3
Prion disease pathway WP3995	12055	0.70258	1	0	0	0.840583	0.296723	PTK2
Resistin as a regulator of inflammation WP4481	12055	0.70258	1	0	0	0.840583	0.296723	PLCG1
Signal transduction through IL1R WP4496	12055	0.70258	1	0	0	0.840583	0.296723	MAPK8
Integrin-mediated Cell Adhesion WP185	3/101	0.7104	1	0	0	0.823938	0.281726	CDC42;SHC1;PTK2
Sterol Regulatory Element-Binding Proteins (SREBP) signalling WP1982	25235	0.716273	1	0	0	0.804036	0.268302	SEC24A;NFYA
Wnt Signaling Pathway and Pluripotency WP399	3/102	0.716655	1	0	0	0.81586	0.271813	PPP2CB;NFYA;NLK
Non-genomic actions of 1,25 dihydroxyvitamin D3 WP4341	25965	0.730898	1	0	0	0.781387	0.244951	NRAS;MAPK8
miRNA Regulation of DNA Damage Response WP1530	25965	0.730898	1	0	0	0.781387	0.244951	CCNG1;RAD17
Wnt Signaling in Kidney Disease WP4150	13150	0.733651	1	0	0	0.770535	0.238652	MAPK8
The effect of progerin on the involved genes in Hutchinson-Gilford Progeria Syndrome WP4320	13516	0.74327	1	0	0	0.749709	0.222436	CBX3
miRNAs involvement in the immune response in sepsis WP4329	13516	0.74327	1	0	0	0.749709	0.222436	MAPK8
Arrhythmogenic Right Ventricular Cardiomyopathy WP2118	27061	0.751631	1	0	0	0.749709	0.214049	DSC2;CACNG4
Thermogenesis WP4321	3/108	0.751995	1	0	0	0.770535	0.219622	NRAS;RPS6KB1;BMP8B
Nuclear Receptors WP170	13881	0.752542	1	0	0	0.72998	0.207532	NR1H3
Bladder Cancer WP2828	14611	0.770095	1	0	0	0.693481	0.181166	NRAS
Oxidative Damage WP3941	14611	0.770095	1	0	0	0.693481	0.181166	CDC42
Fas Ligand (FasL) pathway and Stress induction of Heat Shock Proteins (HSP) regulation WP314	15342	0.786405	1	0	0	0.660458	0.158697	MAPK8
Splicing factor NOVA regulated synaptic proteins WP4148	15342	0.786405	1	0	0	0.660458	0.158697	CASK
TNF related weak inducer of apoptosis (TWEAK) Signaling Pathway WP2036	15342	0.786405	1	0	0	0.660458	0.158697	MAPK8
DNA IR-damage and cellular response via ATR WP4016	29252	0.78899	1	0	0	0.693481	0.164356	RAD17;TOPBP1
Eukaryotic Transcription Initiation WP405	15707	0.794121	1	0	0	0.645099	0.148708	POLR3D
Vitamin A and Carotenoid Metabolism WP716	15707	0.794121	1	0	0	0.645099	0.148708	RETSAT
Interleukin-11 Signaling Pathway WP2332	16072	0.801559	1	0	0	0.630438	0.139451	RPS6KB1
Spinal Cord Injury WP2431	3/118	0.802931	1	0	0	0.705235	0.154789	CDC42;CCNG1;E2F5
Alzheimers Disease WP2059	30348	0.805746	1	0	0	0.668416	0.144369	APH1A;EIF2AK3
ATM Signaling Network in Development and Disease WP3878	16438	0.808729	1	0	0	0.616428	0.130863	KAT5
Glycolysis and Gluconeogenesis WP534	16438	0.808729	1	0	0	0.616428	0.130863	ENO1
MicroRNAs in cardiomyocyte hypertrophy WP1544	30713	0.811063	1	0	0	0.660458	0.138306	EIF2B5;MAPK8
Viral Acute Myocarditis WP4298	30713	0.811063	1	0	0	0.660458	0.138306	JKAMP;PABPC1
Hippo-Merlin Signaling Dysregulation WP4541	3/120	0.811993	1	0	0	0.693481	0.144427	LATS1;NRAS;PTK2
Aryl Hydrocarbon Receptor Pathway WP2873	16803	0.815639	1	0	0	0.603027	0.122887	CES3
Aryl Hydrocarbon Receptor WP2586	16803	0.815639	1	0	0	0.603027	0.122887	NRAS
Pathways in clear cell renal cell carcinoma WP4018	31079	0.816249	1	0	0	0.652688	0.132519	ENO1;PSPH
Retinoblastoma Gene in Cancer WP2446	31809	0.826241	1	0	0	0.637684	0.121714	HLTF;SKP2
Epithelial to mesenchymal transition in colorectal cancer WP4239	4/159	0.829395	1	0	0	0.697843	0.130538	MAPK8;SHC1;EED;SNAI1
Hepatitis C and Hepatocellular Carcinoma WP3646	17899	0.834911	1	0	0	0.566107	0.102143	MAPK8
Structural Pathway of Interleukin 1 (IL-1) WP2637	17899	0.834911	1	0	0	0.566107	0.102143	MAPK8
Photodynamic therapy-induced AP-1 survival signaling. WP3611	18264	0.840877	1	0	0	0.554785	0.0961495	MAPK8
Focal Adhesion WP306	5/198	0.845464	1	0	0	0.700486	0.117591	CDC42;MAPK8;SHC1;PTK2;CRKL
Circadian rhythm related genes WP3594	5/201	0.854465	1	0	0	0.690031	0.108528	MAPK8;GFPT1;NR1H3;ATF4;CIART
Phosphodiesterases in neuronal function WP4222	19360	0.857514	1	0	0	0.523382	0.080453	PDE9A
TGF-beta Receptor Signaling WP560	19725	0.862664	1	0	0	0.51369	0.0758872	FST
Cardiac Hypertrophic Response WP2795	20090	0.867629	1	0	0	0.50435	0.0716134	MAPK8
PI3K-Akt Signaling Pathway WP4172	9/340	0.867919	1	0	0	0.734274	0.104015	PPP2CB;NRAS;FGF8;IL4R;RPS6KB1;PTK2;EIF4B;ATF4;PIK3R5
Pathways Regulating Hippo Signaling WP4540	35827	0.872928	1	0	0	0.566107	0.0769354	LATS1;CDC42
Preimplantation Embryo WP3527	21186	0.881472	1	0	0	0.478263	0.0603387	E2F5
Neural Crest Differentiation WP2064	2/101	0.883491	1	0	0	0.549292	0.068043	FGF8;SNAI1
Electron Transport Chain (OXPHOS system in mitochondria) WP111	2/103	0.890076	1	0	0	0.538626	0.0627222	COX15;SDHC
Toll-like Receptor Signaling Pathway WP75	2/103	0.890076	1	0	0	0.538626	0.0627222	MAPK8;PIK3R5
Nuclear Receptors Meta-Pathway WP2882	8/319	0.892534	1	0	0	0.695655	0.0790896	DNAJB1;RGS2;SLC39A9;GPX3;MAFG;NR1H3;CES3;FTL
Notch Signaling Pathway WP61	22282	0.893869	1	0	0	0.454742	0.0510201	APH1A
Prader-Willi and Angelman Syndrome WP3998	22282	0.893869	1	0	0	0.454742	0.0510201	GNRH1
TYROBP Causal Network WP3945	22282	0.893869	1	0	0	0.454742	0.0510201	GAL3ST4
T-Cell antigen Receptor (TCR) pathway during Staphylococcus aureus infection WP3863	22647	0.897707	1	0	0	0.447407	0.0482805	PLCG1
Endometrial cancer WP4155	23012	0.901406	1	0	0	0.440306	0.0457035	NRAS
Lung fibrosis WP3624	23012	0.901406	1	0	0	0.440306	0.0457035	FAM13A
Pathways Affected in Adenoid Cystic Carcinoma WP3651	23743	0.908408	1	0	0	0.426758	0.040995	MORF4L1
Folate Metabolism WP176	24108	0.911721	1	0	0	0.420292	0.038844	GPX3
Human Thyroid Stimulating Hormone (TSH) signaling pathway WP2032	24108	0.911721	1	0	0	0.420292	0.038844	RPS6KB1
PPAR signaling pathway WP3942	24473	0.914914	1	0	0	0.414019	0.0368169	NR1H3
DNA Damage Response WP707	24838	0.917991	1	0	0	0.40793	0.0349055	RAD17
Sudden Infant Death Syndrome (SIDS) Susceptibility Pathways WP706	3/158	0.927419	1	0	0	0.526695	0.0396861	VIPR1;NFYA;POU3F2
Chromosomal and microsatellite instability in colorectal cancer WP4216	26665	0.93179	1	0	0	0.37999	0.0268456	MAPK8
Adipogenesis WP236	2/130	0.950942	1	0	0	0.426758	0.021467	NR1H3;PLIN2
Allograft Rejection WP2328	32509	0.962183	1	0	0	0.311677	0.0120152	CSNK2A2
Apoptosis Modulation and Signaling WP1772	33239	0.964872	1	0	0	0.304827	0.0109004	MAPK8
G Protein Signaling Pathways WP35	33970	0.967371	1	0	0	0.298272	0.00989475	NRAS
Calcium Regulation in the Cardiac Cell WP536	2/149	0.972728	1	0	0	0.372339	0.0102955	RGS2;ATP1B3
Integrated Breast Cancer Pathway WP1984	2/151	0.974382	1	0	0	0.367407	0.00953489	CDC42;CCNB1IP1
Senescence and Autophagy in Cancer WP615	1/105	0.979044	1	0	0	0.264183	0.00559516	BECN1
ESC Pluripotency Pathways WP3931	1/116	0.986038	1	0	0	0.239131	0.00336232	FGF8
Vitamin D Receptor Pathway WP2877	1/182	0.998783	1	0	0	0.152413	0.00018567	SLC37A2
GPCRs, Class A Rhodopsin-like WP455	1/257	0.999922	1	0	0	0.107935	8.44162e-06	GPR19

## Sheet: cluster 4
Term	Overlap	P-value	Adjusted P-value	Old P-value	Old Adjusted P-value	Odds Ratio	Combined Score	Genes
Mesodermal Commitment Pathway WP2857	12/147	0.00248319	1	0	0	2.58331	15.4953	KIAA0754;RARG;LEFTY1;KLF5;CCND1;DDAH1;UBR5;BHLHE40;CEP250;TOX;TRERF1;PARP8
Alzheimers Disease WP2059	30529	0.00468347	1	0	0	3.05018	16.3603	APP;PPP3CA;CASP7;CASP8;ATP2A3;PSEN2;FAS;GRIN2D
Hippo-Yap signaling pathway WP4537	43944	0.00542004	0.852752	0	0	5.50358	28.7158	STK38L;NF2;TNIK;MAP4K3
Mammary gland development pathway - Embryonic development (Stage 1 of 4) WP2813	43905	0.0107587	1	0	0	6.32911	28.6838	NRG3;CCND1;MYC
miRNAs involved in DNA damage response WP1545	43905	0.0107587	1	0	0	6.32911	28.6838	CCND3;CCND1;MYC
Circadian rhythm related genes WP3594	13/201	0.0117449	0.923932	0	0	2.04673	9.09635	NGFR;CPT1A;CIPC;NTRK3;ADCY1;NPAS2;ARNTL;PER3;DBP;BHLHE40;KLF9;FAS;EP300
PI3K-Akt Signaling Pathway WP4172	19/340	0.0121783	0.821169	0	0	1.76843	7.7954	NGFR;ITGA4;EPO;FLT4;TGFA;LPAR3;OSMR;CCND3;CCND1;PPP2R1A;RHEB;MYC;SPP1;GNB4;ITGA7;GNB5;PIK3AP1;JAK3;TLR2
Notch Signaling Pathway WP61	22433	0.0123958	0.731353	0	0	3.11268	13.6659	TLE1;APH1B;CCND1;MYC;PSEN2;EP300
Mammary gland development pathway - Pregnancy and lactation (Stage 3 of 4) WP2817	11780	0.0176087	0.92348	0	0	3.9557	15.9785	CCND1;ERBB3;MYC;ESR2
Molybdenum cofactor (Moco) biosynthesis WP4507	43868	0.01884	0.889246	0	0	9.04159	35.9112	AOX1;GPHN
Apoptosis Modulation by HSP70 WP384	43909	0.0208699	0.895507	0	0	4.99667	19.3344	CASP7;CASP8;FAS
Nanomaterial induced apoptosis WP2507	43910	0.0239888	0.943558	0	0	4.74684	17.7065	CASP7;CASP8;FAS
Hippo-Merlin Signaling Dysregulation WP4541	8/120	0.0366564	1	0	0	2.1097	6.97504	NGFR;CCND1;ITGA4;MYC;FLT4;ITGA7;PAK6;NF2
Integrin-mediated Cell Adhesion WP185	7/101	0.0409894	1	0	0	2.19326	7.00623	CAPN6;ITGA4;CAPN5;ZYX;ITGA7;PAK6;ARHGEF7
IL-7 Signaling Pathway WP205	43915	0.0431157	1	0	0	3.79747	11.9387	CCND1;MYC;JAK3
Nucleotide GPCRs WP80	43872	0.0453942	1	0	0	5.75374	17.7927	ADORA2B;P2RY1
PPAR Alpha Pathway WP2878	43916	0.0476318	1	0	0	3.65141	11.1158	CPT1A;CCND1;MYC
Pathways in clear cell renal cell carcinoma WP4018	31199	0.0522835	1	0	0	2.2338	6.59213	PGBD5;RHEB;LDHD;SSPN;EP300;KCNJ2
RalA downstream regulated genes WP2290	43873	0.0533567	1	0	0	5.27426	15.4576	EXOC8;EXOC2
Angiopoietin Like Protein 8 Regulatory Pathway WP3915	8/132	0.058319	1	0	0	1.91791	5.45038	THRB;RHEB;MAPKAP1;IRS2;SLC16A2;MAP3K6;MAP4K3;MAP3K12
Ganglio Sphingolipid Metabolism WP1423	43874	0.0617693	1	0	0	4.86855	13.5557	ST8SIA3;ST8SIA5
Mammary gland development pathway - Puberty (Stage 2 of 4) WP2814	43874	0.0617693	1	0	0	4.86855	13.5557	CCND1;MYC
Serotonin and anxiety-related events WP3944	43874	0.0617693	1	0	0	4.86855	13.5557	PPP3CA;GRIN2D
DNA Damage Response WP707	24959	0.0636633	1	0	0	2.32688	6.40857	CCND3;CASP8;CCND1;MYC;FAS
ErbB Signaling Pathway WP673	33390	0.0682985	1	0	0	2.08652	5.59995	CCND1;NRG3;ERBB3;MYC;TGFA;PAK6
miRNA Regulation of DNA Damage Response WP1530	26054	0.073774	1	0	0	2.22856	5.8093	CCND3;CASP8;CCND1;MYC;FAS
G Protein Signaling Pathways WP35	34121	0.0742033	1	0	0	2.04165	5.31022	GNAO1;PPP3CA;GNA12;ADCY1;GNB5;AKAP3
Endoderm Differentiation WP2853	8/141	0.0789698	1	0	0	1.79549	4.5582	APP;RARG;DDAH1;UBR5;CEP250;TOX;TRERF1;PARP8
Initiation of transcription and translation elongation at the HIV-1 LTR WP3414	11749	0.0792304	1	0	0	2.96677	7.52194	CDK9;PPP3CA;EP300
Spinal Cord Injury WP2431	7/118	0.0804906	1	0	0	1.87728	4.73002	BCAN;NGFR;PPP3CA;GAP43;CCND1;GDNF;MYC
Copper homeostasis WP3286	19085	0.0814839	1	0	0	2.43427	6.10358	APP;CCND1;COMMD1;MT3
BDNF-TrkB Signaling WP3676	12479	0.0913514	1	0	0	2.79226	6.68198	RHEB;MKNK1;ADCY1
IL-9 Signaling Pathway WP22	43878	0.0992216	1	0	0	3.72301	8.60164	CDK9;JAK3
Leptin Insulin Overlap WP3935	43878	0.0992216	1	0	0	3.72301	8.60164	IRS2;DGKZ
Sulfation Biotransformation Reaction WP692	43878	0.0992216	1	0	0	3.72301	8.60164	SULT1C2;PAPSS2
Focal Adhesion-PI3K-Akt-mTOR-signaling pathway WP3932	14/303	0.101395	1	0	0	1.46217	3.34652	NGFR;ITGA4;EPO;FLT4;LPAR3;IRS2;OSMR;PIK3IP1;PPP2R1A;RHEB;SPP1;GNB4;ITGA7;JAK3
Target Of Rapamycin (TOR) Signaling WP1471	13210	0.104187	1	0	0	2.63713	5.96406	RHEB;MAPKAP1;ULK3
Nuclear Receptors WP170	13940	0.117684	1	0	0	2.49833	5.34581	RARG;THRB;ESR2
Mitochondrial Gene Expression WP391	43880	0.119788	1	0	0	3.33111	7.06872	PPP3CA;PPARGC1B
Sudden Infant Death Syndrome (SIDS) Susceptibility Pathways WP706	8/158	0.128403	1	0	0	1.60231	3.28887	CPT1A;THRB;BHLHE40;EP300;SCN5A;PKNOX1;PPARGC1B;ESR2
Hematopoietic Stem Cell Gene Regulation by GABP alpha/beta Complex WP3657	43881	0.130433	1	0	0	3.16456	6.44588	EP300;ETV6
Urea cycle and metabolism of amino groups WP497	43881	0.130433	1	0	0	3.16456	6.44588	GLUD1;ASS1
Nucleotide-binding Oligomerization Domain (NOD) pathway WP1433	15036	0.139056	1	0	0	2.31553	4.56826	CASP7;CASP8;DUOX2
Glycerophospholipid Biosynthetic Pathway WP2533	43882	0.141284	1	0	0	3.01386	5.89808	PTDSS1;GK
Fas Ligand (FasL) pathway and Stress induction of Heat Shock Proteins (HSP) regulation WP314	15401	0.146452	1	0	0	2.2604	4.34235	CASP7;CASP8;FAS
Sulindac Metabolic Pathway WP2542	43835	0.148339	1	0	0	6.32911	12.0776	MSRA
Pathways Affected in Adenoid Cystic Carcinoma WP3651	23833	0.149602	1	0	0	1.94742	3.69967	MYC;MAGI2;EP300;IL17RD
Allograft Rejection WP2328	32629	0.150813	1	0	0	1.77784	3.36316	CASP7;CASP8;GDNF;FAS;HLA-DRB1
Eukaryotic Transcription Initiation WP405	15766	0.153974	1	0	0	2.20783	4.13079	POLR2A;POLR3B;GTF2H1
Human Thyroid Stimulating Hormone (TSH) signaling pathway WP2032	24198	0.155551	1	0	0	1.91791	3.56882	GNAO1;CCND3;MYC;GNA12
Androgen receptor signaling pathway WP138	32994	0.155835	1	0	0	1.75809	3.26821	CCND1;EP300;PAK6;PIAS2;PLPP1
Blood Clotting Cascade WP272	43884	0.163514	1	0	0	2.75179	4.98309	F8A1;F12
The human immune response to tuberculosis WP4197	43884	0.163514	1	0	0	2.75179	4.98309	MX1;IFI35
GPCRs, Class B Secretin-like WP334	43885	0.174849	1	0	0	2.63713	4.59871	ADGRE5;ADGRL2
Triacylglyceride Synthesis WP325	43885	0.174849	1	0	0	2.63713	4.59871	GK;PLPP1
miRNA regulation of p53 pathway in prostate cancer WP3982	43885	0.174849	1	0	0	2.63713	4.59871	CASP8;CYS1
Metastatic brain tumor WP2249	43836	0.175258	1	0	0	5.27426	9.18511	MYC
Nicotine Metabolism WP1600	43836	0.175258	1	0	0	5.27426	9.18511	AOX1
let-7 inhibition of ES cell reprogramming WP3299	43836	0.175258	1	0	0	5.27426	9.18511	MYC
Energy Metabolism WP1541	17227	0.185176	1	0	0	2.01993	3.40651	PPP3CA;EP300;PPARGC1B
Mechanoregulation and pathology of YAP/TAZ via Hippo and non-Hippo mechanisms WP4534	17227	0.185176	1	0	0	2.01993	3.40651	PAK6;NF2;MAP4K3
Differentiation of white and brown adipocyte WP2895	43886	0.186304	1	0	0	2.53165	4.25411	EBF3;PPARGC1B
Human Complement System WP2806	35551	0.192791	1	0	0	1.63121	2.68523	C1R;F12;SPP1;PTX3;TLR2
Calcium Regulation in the Cardiac Cell WP536	7/149	0.192997	1	0	0	1.4867	2.44575	GNAO1;GNB4;ATP2A3;RGS20;ARRB1;GNB5;ADCY1
Exercise-induced Circadian Regulation WP410	17593	0.193222	1	0	0	1.97785	3.25142	KLF9;ARNTL;ETV6
Rett syndrome causing genes WP4312	17593	0.193222	1	0	0	1.97785	3.25142	GNAO1;STXBP1;SYNE2
EPO Receptor Signaling WP581	43887	0.19786	1	0	0	2.43427	3.944	EPO;IRS2
Wnt/beta-catenin Signaling Pathway in Leukemia WP3658	43887	0.19786	1	0	0	2.43427	3.944	CCND1;MYC
Glial Cell Differentiation WP2276	43837	0.201327	1	0	0	4.5208	7.24604	GAP43
Hfe effect on hepcidin production WP3924	43837	0.201327	1	0	0	4.5208	7.24604	HFE
Hepatitis C and Hepatocellular Carcinoma WP3646	17958	0.201353	1	0	0	1.93748	3.1052	CASP7;CCND1;MYC
Intraflagellar transport proteins binding to dynein WP4532	43888	0.2095	1	0	0	2.34412	3.66393	IFT46;WDR35
Wnt Signaling Pathway and Pluripotency WP399	5/102	0.220887	1	0	0	1.55125	2.34255	CCND3;CCND1;PPP2R1A;MYC;EP300
Myometrial Relaxation and Contraction Pathways WP289	7/156	0.224459	1	0	0	1.41999	2.12156	GNB4;ATP2A3;RGS20;ARRB1;GNB5;ADCY1;DGKZ
ApoE and miR-146 in inflammation and atherosclerosis WP3926	43838	0.226574	1	0	0	3.9557	5.87295	TLR2
Effects of Nitric Oxide WP1995	43838	0.226574	1	0	0	3.9557	5.87295	AOX1
Phase I biotransformations, non P450 WP136	43838	0.226574	1	0	0	3.9557	5.87295	LIPA
Genes related to primary cilium development (based on CRISPR) WP4536	5/103	0.226651	1	0	0	1.53619	2.28024	WDPCP;B9D1;IFT46;WDR35;BBS4
Apoptosis-related network due to altered Notch3 in ovarian cancer WP2864	19419	0.234603	1	0	0	1.79126	2.59708	APP;CASP7;ERBB3
Phosphodiesterases in neuronal function WP4222	19419	0.234603	1	0	0	1.79126	2.59708	PPP1R1B;ADCY1;GRIN2D
IL-4 Signaling Pathway WP395	19784	0.243066	1	0	0	1.75809	2.48668	EP300;IRS2;JAK3
TGF-beta Receptor Signaling WP560	19784	0.243066	1	0	0	1.75809	2.48668	LEFTY1;SPP1;EP300
Cardiac Hypertrophic Response WP2795	20149	0.251577	1	0	0	1.72612	2.38206	CDK9;PPP3CA;PRKG1
MAPK Signaling Pathway WP382	10/246	0.252367	1	0	0	1.28641	1.77121	PPP3CA;MYC;CACNA2D1;MKNK1;GNA12;FAS;ARRB1;MAP3K6;MAP4K3;MAP3K12
Thermogenesis WP4321	5/108	0.256094	1	0	0	1.46507	1.99574	CPT1A;KDM3A;RHEB;ADCY1;PRKG1
Gastric Cancer Network 2 WP2363	11355	0.256567	1	0	0	2.04165	2.77739	RNF144B;MYC
IL17 signaling pathway WP2112	11355	0.256567	1	0	0	2.04165	2.77739	IL17RE;IL17RD
Ovarian Infertility Genes WP34	11720	0.26839	1	0	0	1.97785	2.60149	SYNE2;ESR2
Apoptosis WP254	30773	0.274456	1	0	0	1.50693	1.94841	CASP7;CASP8;MYC;FAS
MicroRNAs in cardiomyocyte hypertrophy WP1544	30773	0.274456	1	0	0	1.50693	1.94841	CDK9;PPP3CA;PRKG1;MYLK
Leptin and adiponectin WP3934	43840	0.274702	1	0	0	3.16456	4.08882	CPT1A
Mammary gland development pathway - Involution (Stage 4 of 4) WP2815	43840	0.274702	1	0	0	3.16456	4.08882	MYC
Endothelin Pathways WP2197	12086	0.280209	1	0	0	1.91791	2.44001	GNB5;MYLK
MET in type 1 papillary renal cell carcinoma WP4205	21610	0.285994	1	0	0	1.6091	2.01424	PAK6;JAK3;C8ORF34
Focal Adhesion WP306	8/198	0.289775	1	0	0	1.27861	1.58375	CCND3;CCND1;ITGA4;SPP1;ZYX;PAK6;ITGA7;MYLK
Fatty Acid Beta Oxidation WP143	12451	0.292012	1	0	0	1.8615	2.29144	CPT1A;GK
Type 2 papillary renal cell carcinoma WP4241	12451	0.292012	1	0	0	1.8615	2.29144	TGFA;EP300
p38 MAPK Signaling Pathway WP400	12451	0.292012	1	0	0	1.8615	2.29144	MKNK1;MYC
Prader-Willi and Angelman Syndrome WP3998	22341	0.30335	1	0	0	1.55634	1.85651	CCND1;ATP10A;BBS4
TYROBP Causal Network WP3945	22341	0.30335	1	0	0	1.55634	1.85651	SPP1;CYTL1;SH2B3
Alanine and aspartate metabolism WP106	43842	0.31984	1	0	0	2.63713	3.00615	ASS1
IL-10 Anti-inflammatory Signaling Pathway WP4495	43842	0.31984	1	0	0	2.63713	3.00615	BLVRB
Iron metabolism in placenta WP2007	43842	0.31984	1	0	0	2.63713	3.00615	TFR2
Nanoparticle triggered regulated necrosis WP2513	43842	0.31984	1	0	0	2.63713	3.00615	CASP8
Lung fibrosis WP3624	23071	0.320751	1	0	0	1.50693	1.71352	SPP1;TGFA;PTX3
Apoptosis Modulation and Signaling WP1772	33329	0.32437	1	0	0	1.39101	1.5661	CASP7;CASP8;AIFM2;FAS
Melatonin metabolism and effects WP3298	13547	0.327227	1	0	0	1.71057	1.91088	PER3;ARNTL
Photodynamic therapy-induced HIF-1 survival signaling WP3614	13547	0.327227	1	0	0	1.71057	1.91088	EPO;TGFA
G1 to S cell cycle control WP45	23437	0.329456	1	0	0	1.48339	1.64702	CCND3;CCND1;MYC
Cell Cycle WP179	5/120	0.329786	1	0	0	1.31857	1.4627	CCND3;CCND1;MYC;EP300;ANAPC5
Oncostatin M Signaling Pathway WP2374	23802	0.338159	1	0	0	1.46056	1.5836	CASP7;OSMR;JAK3
Amyotrophic lateral sclerosis (ALS) WP2447	13912	0.338868	1	0	0	1.66556	1.80237	PPP3CA;SLC1A2
Sleep regulation WP3591	13912	0.338868	1	0	0	1.66556	1.80237	PER3;NPAS2
Cell Differentiation - Index WP2029	43843	0.341346	1	0	0	2.43427	2.6165	LEFTY1
Genes targeted by miRNAs in adipocytes WP1992	43843	0.341346	1	0	0	2.43427	2.6165	KCNJ2
Kennedy pathway from Sphingolipids WP3933	43843	0.341346	1	0	0	2.43427	2.6165	PTDSS1
Osteopontin Signaling WP1434	43843	0.341346	1	0	0	2.43427	2.6165	SPP1
Transcriptional cascade regulating adipogenesis WP4211	43843	0.341346	1	0	0	2.43427	2.6165	KLF5
Vitamin B12 Disorders WP4271	43843	0.341346	1	0	0	2.43427	2.6165	MMACHC
ncRNAs involved in STAT3 signaling in hepatocellular carcinoma WP4337	43843	0.341346	1	0	0	2.43427	2.6165	JAK3
Association Between Physico-Chemical Features and Toxicity Associated Pathways WP3680	24167	0.346855	1	0	0	1.43843	1.52309	MYC;TGFA;MYLK
Non-small cell lung cancer WP4255	24167	0.346855	1	0	0	1.43843	1.52309	CCND1;TGFA;JAK3
Vitamin D Receptor Pathway WP2877	7/182	0.352936	1	0	0	1.21714	1.26761	SULT1C2;CCND1;ADGRE5;MYC;CREG2;SPP1;HLA-DRB1
Bladder Cancer WP2828	14642	0.361955	1	0	0	1.58228	1.60797	CCND1;MYC
ERK Pathway in Huntington's Disease WP3853	43844	0.362173	1	0	0	2.2604	2.29573	CASP7
H19 action Rb-E2F1 signaling and CDK-Beta-catenin activity WP3969	43844	0.362173	1	0	0	2.2604	2.29573	CCND1
Ras Signaling WP4223	7/184	0.363253	1	0	0	1.20391	1.21914	NGFR;FLT4;GNB4;PAK6;RASAL2;GNB5;EXOC2
AMP-activated Protein Kinase (AMPK) Signaling WP1403	25263	0.372858	1	0	0	1.37589	1.3574	CPT1A;CAMKK1;PPARGC1B
Oxysterols derived from cholesterol WP4545	43845	0.382343	1	0	0	2.1097	2.02835	ESR2
Common Pathways Underlying Drug Addiction WP2636	15373	0.384732	1	0	0	1.50693	1.43943	ADCY1;GRIA4
IL-2 Signaling Pathway WP49	15373	0.384732	1	0	0	1.50693	1.43943	MYC;JAK3
Splicing factor NOVA regulated synaptic proteins WP4148	15373	0.384732	1	0	0	1.50693	1.43943	GRIK2;GPHN
TNF related weak inducer of apoptosis (TWEAK) Signaling Pathway WP2036	15373	0.384732	1	0	0	1.50693	1.43943	CASP7;CASP8
Insulin Signaling WP481	6/160	0.394024	1	0	0	1.18671	1.10523	RHEB;STXBP1;IRS2;MAP3K6;MAP4K3;MAP3K12
Vitamin A and Carotenoid Metabolism WP716	15738	0.395989	1	0	0	1.47189	1.36351	RARG;LRAT
Primary Focal Segmental Glomerulosclerosis FSGS WP2572	26359	0.398656	1	0	0	1.31857	1.21263	MYO1E;KIRREL2;FAT1
Hedgehog Signaling Pathway WP47	43846	0.401875	1	0	0	1.97785	1.80303	ARNTL
NAD+ metabolism WP3644	43846	0.401875	1	0	0	1.97785	1.80303	NRK
Osteoclast Signaling WP12	43846	0.401875	1	0	0	1.97785	1.80303	SPP1
TGF-beta Signaling Pathway WP366	5/132	0.405183	1	0	0	1.1987	1.08292	APP;CCND1;MYC;EP300;PIAS2
Heart Development WP1591	16103	0.407149	1	0	0	1.43843	1.29254	ERBB3;BHLHE40
Hedgehog Signaling Pathway WP4249	16103	0.407149	1	0	0	1.43843	1.29254	CCND1;ARRB1
Integrated Cancer Pathway WP1971	16103	0.407149	1	0	0	1.43843	1.29254	CASP8;MYC
Chromosomal and microsatellite instability in colorectal cancer WP4216	26724	0.407193	1	0	0	1.3005	1.16846	CCND1;MYC;EXOC2
Arrhythmogenic Right Ventricular Cardiomyopathy WP2118	27089	0.415694	1	0	0	1.28293	1.12616	ITGA4;CACNA2D1;ITGA7
Chemokine signaling pathway WP3929	6/164	0.41662	1	0	0	1.15776	1.01372	GNB4;ARRB1;GNB5;ADCY1;DOCK2;JAK3
Notch Signaling WP268	16469	0.418209	1	0	0	1.40647	1.22612	APH1B;PSEN2
Cells and Molecules involved in local acute inflammatory response WP4493	43847	0.420791	1	0	0	1.8615	1.61135	ITGA4
Mitochondrial LC-Fatty Acid Beta-Oxidation WP368	43847	0.420791	1	0	0	1.8615	1.61135	CPT1A
Platelet-mediated interactions with vascular and circulating cells WP4462	43847	0.420791	1	0	0	1.8615	1.61135	TLR2
Regulation of Wnt/B-catenin Signaling by Small Molecule Compounds WP3664	43847	0.420791	1	0	0	1.8615	1.61135	MBOAT1
Serotonin and anxiety WP3947	43847	0.420791	1	0	0	1.8615	1.61135	PPP3CA
Aryl Hydrocarbon Receptor WP2586	16834	0.429163	1	0	0	1.37589	1.16389	MYC;EP300
Regulation of Microtubule Cytoskeleton WP2038	16834	0.429163	1	0	0	1.37589	1.16389	MAP1B;MARK2
Tryptophan metabolism WP465	16834	0.429163	1	0	0	1.37589	1.16389	UBR5;AOX1
Prolactin Signaling Pathway WP2037	27820	0.432573	1	0	0	1.24917	1.04681	MYC;AGAP2;IRS2
4-hydroxytamoxifen, Dexamethasone, and Retinoic Acids Regulation of p27 Expression WP3879	43848	0.43911	1	0	0	1.75809	1.44692	MKNK1
Simplified Depiction of MYD88 Distinct Input-Output Pathway WP3877	43848	0.43911	1	0	0	1.75809	1.44692	TLR2
Differentiation Pathway WP2848	17564	0.450737	1	0	0	1.31857	1.05073	LEFTY1;EPO
Cell Differentiation - Index expanded WP2023	43849	0.45685	1	0	0	1.66556	1.3048	LEFTY1
Extracellular vesicles in the crosstalk of cardiac cells WP4300	43849	0.45685	1	0	0	1.66556	1.3048	SPP1
Farnesoid X Receptor Pathway WP2879	43849	0.45685	1	0	0	1.66556	1.3048	IRS2
Overview of nanoparticle effects WP3287	43849	0.45685	1	0	0	1.66556	1.3048	CCND3
TP53 Network WP1742	43849	0.45685	1	0	0	1.66556	1.3048	MYC
Structural Pathway of Interleukin 1 (IL-1) WP2637	17930	0.461349	1	0	0	1.29166	0.999226	MYC;MKNK1
Photodynamic therapy-induced AP-1 survival signaling. WP3611	18295	0.47184	1	0	0	1.26582	0.950779	CCND1;FAS
Synaptic signaling pathways associated with autism spectrum disorder WP4539	18295	0.47184	1	0	0	1.26582	0.950779	RHEB;GRIN2D
BMP Signaling Pathway in Eyelid Development WP3927	43850	0.474029	1	0	0	1.58228	1.18115	TGFA
Hypertrophy Model WP516	43850	0.474029	1	0	0	1.58228	1.18115	NR4A3
Imatinib and Chronic Myeloid Leukemia WP3640	43850	0.474029	1	0	0	1.58228	1.18115	MYC
Brain-Derived Neurotrophic Factor (BDNF) signaling pathway WP2380	5/144	0.479459	1	0	0	1.0988	0.807728	NGFR;LINGO1;NTRK3;SPP1;IRS2
Signaling Pathways in Glioblastoma WP2261	30011	0.482038	1	0	0	1.15776	0.844857	CCND1;ERBB3;EP300
Synaptic Vesicle Pathway WP2267	18660	0.482207	1	0	0	1.241	0.905165	STX1B;STXBP1
Neovascularisation processes WP4331	43851	0.490667	1	0	0	1.50693	1.07292	FLT4
Nicotine Activity on Dopaminergic Neurons WP1602	43851	0.490667	1	0	0	1.50693	1.07292	PPP1R1B
Translation Factors WP107	19025	0.492448	1	0	0	1.21714	0.86218	EIF3J;EIF2AK2
Wnt Signaling Pathway WP363	19025	0.492448	1	0	0	1.21714	0.86218	CCND1;MYC
Wnt Signaling WP428	4/115	0.494509	1	0	0	1.10072	0.775113	PPP3CA;CCND3;CCND1;MYC
Viral Acute Myocarditis WP4298	30742	0.498073	1	0	0	1.1302	0.787759	CASP7;CASP8;CCND1
Pyrimidine metabolism WP4022	31107	0.505995	1	0	0	1.1169	0.760865	POLE4;POLR2A;POLR3B
Complement Activation WP545	43852	0.506779	1	0	0	1.43843	0.977677	C1R
Globo Sphingolipid Metabolism WP1424	43852	0.506779	1	0	0	1.43843	0.977677	A4GALT
Methionine De Novo and Salvage Pathway WP3580	43852	0.506779	1	0	0	1.43843	0.977677	MSRA
PI3K/AKT/mTOR - VitD3 Signalling WP4141	43852	0.506779	1	0	0	1.43843	0.977677	MYC
Regulation of Apoptosis by Parathyroid Hormone-related Protein WP3872	43852	0.506779	1	0	0	1.43843	0.977677	MYC
Transcription factor regulation in adipogenesis WP3599	43852	0.506779	1	0	0	1.43843	0.977677	IRS2
Type II diabetes mellitus WP1584	43852	0.506779	1	0	0	1.43843	0.977677	GK
Vitamin D in inflammatory diseases WP4482	43852	0.506779	1	0	0	1.43843	0.977677	PPP3CA
Interferon type I signaling pathways WP585	19756	0.51254	1	0	0	1.17206	0.783377	MAPKAP1;IRS2
ncRNAs involved in Wnt signaling in hepatocellular carcinoma WP4336	31472	0.513853	1	0	0	1.10392	0.735007	CCND3;CCND1;MYC
Integrated Breast Cancer Pathway WP1984	5/151	0.521347	1	0	0	1.04787	0.682517	CASP8;CCND1;RHEB;MYC;EP300
Retinoblastoma Gene in Cancer WP2446	31837	0.521643	1	0	0	1.09123	0.710139	CCND3;CCND1;MYC
Nanoparticle triggered autophagic cell death WP2509	43853	0.522381	1	0	0	1.37589	0.893447	AMBRA1
Hematopoietic Stem Cell Differentiation WP2849	20121	0.522387	1	0	0	1.15075	0.747234	THRB;EPO
Ciliary landscape WP4352	7/216	0.526683	1	0	0	1.02555	0.657538	EXOC8;WHRN;USH1C;IQGAP2;IFT46;BBS4;EXOC2
Pancreatic adenocarcinoma pathway WP4263	32568	0.537017	1	0	0	1.0667	0.663198	CCND1;TGFA;PAK6
IL1 and megakaryocytes in obesity WP2865	43854	0.537492	1	0	0	1.31857	0.818621	TLR2
Nonalcoholic fatty liver disease WP4396	5/155	0.544625	1	0	0	1.02082	0.620311	MLXIP;CASP7;CASP8;FAS;IRS2
Complement and Coagulation Cascades WP558	21217	0.551118	1	0	0	1.09123	0.650159	C1R;F12
Glycosylation and related congenital defects. WP4521	43855	0.552124	1	0	0	1.26582	0.751876	DPM3
MTHFR deficiency WP4288	43855	0.552124	1	0	0	1.26582	0.751876	GRIN2D
Physiological and Pathological Hypertrophy of the Heart WP1528	43855	0.552124	1	0	0	1.26582	0.751876	PPP3CA
Signal Transduction of S1P Receptor WP26	43855	0.552124	1	0	0	1.26582	0.751876	S1PR5
Cytokines and Inflammatory Response WP530	43856	0.566295	1	0	0	1.21714	0.692113	HLA-DRB1
Corticotropin-releasing hormone signaling pathway WP2355	34029	0.566898	1	0	0	1.02082	0.579396	GNAO1;ARRB1;GNB5
LncRNA involvement in canonical Wnt signaling and colorectal cancer WP4258	34394	0.574181	1	0	0	1.00996	0.560339	CCND3;CCND1;MYC
Canonical and Non-canonical Notch signaling WP3845	43857	0.580018	1	0	0	1.17206	0.638416	PSEN2
Follicle Stimulating Hormone (FSH) signaling pathway WP2035	43857	0.580018	1	0	0	1.17206	0.638416	RHEB
Sphingolipid pathway WP1422	43857	0.580018	1	0	0	1.17206	0.638416	PLPP1
Ebola Virus Pathway on Host WP4217	4/129	0.585283	1	0	0	0.981258	0.52562	ITGA4;EP300;EIF2AK2;HLA-DRB1
Adipogenesis WP236	4/130	0.5914	1	0	0	0.97371	0.511454	KLF5;GTF3A;FAS;IRS2
TLR4 Signaling and Tolerance WP3851	43858	0.593307	1	0	0	1.1302	0.590013	IRAK3
B Cell Receptor Signaling Pathway WP23	35490	0.595566	1	0	0	0.978729	0.507219	MYC;PIK3AP1;GTF2I
Endometrial cancer WP4155	23043	0.596241	1	0	0	1.00462	0.5195	CCND1;MYC
Pathways Regulating Hippo Signaling WP4540	35855	0.602537	1	0	0	0.968742	0.49077	NGFR;FLT4;NF2
Cannabinoid receptor signaling WP3869	43859	0.606177	1	0	0	1.09123	0.546251	ADCY1
MAPK Cascade WP422	43859	0.606177	1	0	0	1.09123	0.546251	MAP3K12
PDGFR-beta pathway WP3972	43859	0.606177	1	0	0	1.09123	0.546251	EIF2AK2
T-Cell Receptor and Co-stimulatory Signaling WP2583	43859	0.606177	1	0	0	1.09123	0.546251	PPP3CA
Extracellular vesicle-mediated signaling in recipient cells WP2870	43860	0.618639	1	0	0	1.05485	0.506575	TGFA
Oligodendrocyte Specification and differentiation(including remyelination), leading to Myelin Components for CNS WP4304	43860	0.618639	1	0	0	1.05485	0.506575	SOX8
PI3K-AKT-mTOR signaling pathway and therapeutic opportunities WP3844	43860	0.618639	1	0	0	1.05485	0.506575	RHEB
VEGFA-VEGFR2 Signaling Pathway WP3888	7/236	0.620441	1	0	0	0.93864	0.448036	PPP3CA;NR4A3;CCND1;MAPKAP1;MKNK1;FAS;PRKG1
Factors and pathways affecting insulin-like growth factor (IGF1)-Akt signaling WP3850	43861	0.630708	1	0	0	1.02082	0.47051	NEB
GABA receptor Signaling WP4159	43861	0.630708	1	0	0	1.02082	0.47051	GPHN
Toll-like Receptor Signaling WP3858	43861	0.630708	1	0	0	1.02082	0.47051	TLR2
Toll-like Receptor Signaling Pathway WP75	3/103	0.636189	1	0	0	0.921716	0.416855	CASP8;SPP1;TLR2
RAC1/PAK1/p38/MMP2 Pathway WP3303	24869	0.637877	1	0	0	0.930752	0.418476	CASP7;MYC
Development and heterogeneity of the ILC family WP3893	11689	0.642396	1	0	0	0.988924	0.437648	TOX
White fat cell differentiation WP4149	11689	0.642396	1	0	0	0.988924	0.437648	KLF5
Regulation of toll-like receptor signaling pathway WP1449	4/139	0.643975	1	0	0	0.910664	0.400778	CASP8;SPP1;IRAK3;TLR2
Alpha 6 Beta 4 signaling pathway WP244	12055	0.653715	1	0	0	0.958957	0.407638	IRS2
Fluoropyrimidine Activity WP1601	12055	0.653715	1	0	0	0.958957	0.407638	FPGS
Nuclear Receptors in Lipid Metabolism and Toxicity WP299	12055	0.653715	1	0	0	0.958957	0.407638	RARG
Oxidative Stress WP408	12055	0.653715	1	0	0	0.958957	0.407638	NFIX
Prion disease pathway WP3995	12055	0.653715	1	0	0	0.958957	0.407638	EP300
Signal transduction through IL1R WP4496	12055	0.653715	1	0	0	0.958957	0.407638	IRAK3
miRNA regulation of prostate cancer signaling pathways WP3981	12055	0.653715	1	0	0	0.958957	0.407638	CCND1
Photodynamic therapy-induced NF-kB survival signaling WP3617	12785	0.675289	1	0	0	0.904159	0.354985	CCND1
DNA Damage Response (only ATM dependent) WP710	3/110	0.67987	1	0	0	0.863061	0.333015	CCND3;CCND1;MYC
Nuclear Receptors Meta-Pathway WP2882	9/319	0.681715	1	0	0	0.892822	0.34208	CPT1A;GPR153;CCND1;MYC;BHLHE40;TGFA;EP300;BLVRB;IRS2
Zinc homeostasis WP3529	13150	0.685568	1	0	0	0.879044	0.331845	MT3
Metapathway biotransformation Phase I and II WP702	5/183	0.690098	1	0	0	0.864633	0.320711	SULT1C2;CHST7;CYP4V2;GSTT2B;CHST2
The effect of progerin on the involved genes in Hutchinson-Gilford Progeria Syndrome WP4320	13516	0.695522	1	0	0	0.855286	0.310548	MBD2
Type II interferon signaling (IFNG) WP619	13516	0.695522	1	0	0	0.855286	0.310548	EIF2AK2
Regulation of Actin Cytoskeleton WP51	4/150	0.701906	1	0	0	0.843882	0.298696	GNA12;PAK6;ARHGEF7;MYLK
Parkinsons Disease Pathway WP2371	13881	0.705161	1	0	0	0.832778	0.290913	CASP7
Striated Muscle Contraction Pathway WP383	13881	0.705161	1	0	0	0.832778	0.290913	NEB
G13 Signaling Pathway WP524	14246	0.714496	1	0	0	0.811425	0.272783	IQGAP2
Breast cancer pathway WP4262	4/154	0.721205	1	0	0	0.821963	0.268643	CCND1;MYC;FLT4;ESR2
Ferroptosis WP4313	14611	0.723536	1	0	0	0.791139	0.256017	LPCAT3
Glycogen Synthesis and Degradation WP500	14611	0.723536	1	0	0	0.791139	0.256017	PPP2R1A
IL-5 Signaling Pathway WP127	14611	0.723536	1	0	0	0.791139	0.256017	MYC
Oxidative Damage WP3941	14611	0.723536	1	0	0	0.791139	0.256017	C1R
Metabolic reprogramming in colon cancer WP4290	15342	0.740766	1	0	0	0.753466	0.226093	GLUD1
Prostaglandin Synthesis and Regulation WP98	16438	0.764623	1	0	0	0.703235	0.188729	PPARGC1B
Aryl Hydrocarbon Receptor Pathway WP2873	16803	0.772077	1	0	0	0.687947	0.177952	EP300
NO/cGMP/PKG mediated Neuroprotection WP4008	17168	0.779296	1	0	0	0.67331	0.167899	GRIN2D
Thymic Stromal LymphoPoietin (TSLP) Signaling Pathway WP2203	17168	0.779296	1	0	0	0.67331	0.167899	MYC
T-Cell antigen Receptor (TCR) Signaling Pathway WP69	32905	0.781866	1	0	0	0.703235	0.173046	FAS;SH2B3
Amino Acid metabolism WP3925	33270	0.787029	1	0	0	0.695507	0.166567	GLUD1;ASS1
TNF alpha Signaling Pathway WP231	33635	0.792084	1	0	0	0.687947	0.160352	CASP7;CASP8
Ectoderm Differentiation WP2858	3/138	0.815709	1	0	0	0.687947	0.140133	MYC;ELOVL2;NF2
Cardiac Progenitor Differentiation WP2406	19360	0.81806	1	0	0	0.597086	0.119907	SCN5A
IL-1 signaling pathway WP195	20090	0.829407	1	0	0	0.575374	0.107621	IRAK3
RANKL/RANK (Receptor activator of NFKB (ligand)) Signaling Pathway WP2018	20090	0.829407	1	0	0	0.575374	0.107621	PAPSS2
Neural Crest Differentiation WP2064	2/101	0.833002	1	0	0	0.626645	0.1145	MPZ;MYC
Preimplantation Embryo WP3527	21186	0.845116	1	0	0	0.545613	0.0918167	SOX8
Kit receptor signaling pathway WP304	21551	0.850024	1	0	0	0.536366	0.0871542	EP300
Oxidative phosphorylation WP623	21916	0.854778	1	0	0	0.527426	0.0827606	DMAC2L
RIG-I-like Receptor Signaling WP3865	21916	0.854778	1	0	0	0.527426	0.0827606	CASP8
Oxidation by Cytochrome P450 WP43	22282	0.85938	1	0	0	0.51878	0.0786178	CYP4V2
Genotoxicity pathway WP4286	23012	0.868153	1	0	0	0.502311	0.0710201	TM7SF3
Endochondral Ossification WP474	23377	0.872333	1	0	0	0.494462	0.0675357	SPP1
AGE/RAGE pathway WP2324	24108	0.880299	1	0	0	0.479478	0.0611303	CASP8
PPAR signaling pathway WP3942	24473	0.884094	1	0	0	0.472322	0.0581861	CPT1A
Sterol Regulatory Element-Binding Proteins (SREBP) signalling WP1982	25204	0.891328	1	0	0	0.458631	0.0527624	PPARGC1B
Parkin-Ubiquitin Proteasomal System pathway WP2359	25569	0.894773	1	0	0	0.45208	0.0502643	CASP8
Non-genomic actions of 1,25 dihydroxyvitamin D3 WP4341	25934	0.89811	1	0	0	0.445712	0.0478973	TLR2
Peptide GPCRs WP24	27030	0.9075	1	0	0	0.427643	0.0415078	ATP8A1
Leptin signaling pathway WP2034	27760	0.913275	1	0	0	0.416389	0.0377743	CCND1
GPCRs, Other WP117	33239	0.946533	1	0	0	0.347754	0.019109	ADGRL2
NRF2 pathway WP2884	2/146	0.94753	1	0	0	0.433501	0.0233643	TGFA;BLVRB
Epithelial to mesenchymal transition in colorectal cancer WP4239	2/159	0.962988	1	0	0	0.398057	0.0150126	TJP1;CLDN9
Electron Transport Chain (OXPHOS system in mitochondria) WP111	1/103	0.963698	1	0	0	0.307239	0.0113608	DMAC2L
EGF/EGFR Signaling Pathway WP437	2/162	0.965876	1	0	0	0.390686	0.0135644	USP6NL;STXBP1
Senescence and Autophagy in Cancer WP615	1/105	0.965968	1	0	0	0.301386	0.0104355	AMBRA1
mRNA Processing WP411	1/126	0.982728	1	0	0	0.251155	0.00437595	POLR2A
GPCRs, Class A Rhodopsin-like WP455	2/257	0.997652	1	0	0	0.246269	0.000579027	ADORA2B;P2RY1

## Sheet: cluster 5
Term	Overlap	P-value	Adjusted P-value	Old P-value	Old Adjusted P-value	Odds Ratio	Combined Score	Genes
Retinoblastoma Gene in Cancer WP2446	15/87	1.16124e-05	0.00548106	0	0	3.6762	41.7743	RRM1;HDAC1;RPA1;RPA2;SMC1A;MSH6;POLD3;RABIF;TFDP1;CCNE2;SIN3A;CDK4;CDK1;E2F2;POLE
DNA IR-damage and cellular response via ATR WP4016	14/80	1.89536e-05	0.00447306	0	0	3.73134	40.5728	FANCI;FEN1;MRE11;TOP3A;RPA1;RPA2;BRCC3;BRCA2;SMC1A;BRIP1;RAD50;RECQL5;CDK1;MCM2
G1 to S cell cycle control WP45	23682	0.00017294	0.0272092	0	0	3.66471	31.7458	POLA2;TFDP1;ORC6;CCNE2;CDK4;RPA1;CDK1;E2F2;RPA2;POLE;MCM2
Homologous recombination WP186	43964	0.00021075	0.0248685	0	0	8.20075	69.4181	POLD3;RAD50;MRE11;RPA1;BRCA2
ATM Signaling Pathway WP2516	14824	0.000458165	0.0432507	0	0	4.26439	32.7859	RAD50;MRE11;CDK1;CASP2;RIPK1;BID;SMC1A;AP3B2
mRNA Processing WP411	14/126	0.00236721	0.18622	0	0	2.36911	14.3237	DHX9;FUS;SRSF1;SMC1A;U2AF2;TRA2B;SRSF2;HNRNPD;CD2BP2;SRSF3;DHX38;SRSF6;SRSF7;SRSF10
Regulation of Apoptosis by Parathyroid Hormone-related Protein WP3872	43973	0.00303328	0.204529	0	0	4.8459	28.0971	GSK3A;BAX;BID;BCL2L14;BOK
DDX1 as a regulatory component of the Drosha microprocessor WP2942	43897	0.00312225	0.184213	0	0	9.13798	52.7189	RAD50;MRE11;DGCR8
DNA Replication WP466	15523	0.00312731	0.16401	0	0	3.55366	20.496	POLD3;POLA2;ORC6;RPA1;RPA2;POLE;MCM2
DNA Damage Response WP707	25082	0.00433917	0.204809	0	0	2.82202	15.352	RAD50;MRE11;CCNE2;CDK4;CDK1;RPA2;BAX;SMC1A;BID
ATM Signaling Network in Development and Disease WP3878	16619	0.0046587	0.1999	0	0	3.31675	17.8077	RAD50;MRE11;ATMIN;CDK1;SMC1A;HMGN1;CDK5R1
miRNA Regulation of DNA Damage Response WP1530	26177	0.00579121	0.227788	0	0	2.70278	13.9232	RAD50;MRE11;CCNE2;CDK4;CDK1;RPA2;BAX;SMC1A;BID
DNA Mismatch Repair WP531	43899	0.00698262	0.253523	0	0	7.10732	35.2831	MSH6;LIG1;RPA1
Gene regulatory network modelling somitogenesis WP2854	43901	0.0127855	0.431054	0	0	5.81508	25.3505	LFNG;EPHA4;TBX6
Neovascularisation processes WP4331	43942	0.015195	0.478135	0	0	4.06133	17.0039	SMAD1;KIT;TGFBR1;EPHB4
Integrated Cancer Pathway WP1971	16224	0.016136	0.476013	0	0	2.90754	11.9985	MSH6;RAD50;MRE11;CDK4;CDK1;BAX
Apoptosis WP254	30926	0.0167555	0.465211	0	0	2.2845	9.34137	IRF3;DIABLO;CASP2;BAX;TRAF2;IRF5;RIPK1;BID;BOK
Genes related to primary cilium development (based on CRISPR) WP4536	10/103	0.0227055	0.59539	0	0	2.07009	7.83561	EVC2;C2CD3;TRAF3IP1;KIF3A;RAB23;KIAA0753;TULP3;CEP162;RPGRIP1L;DYNLL1
Cell Cycle WP179	11/120	0.0254695	0.632716	0	0	1.95451	7.1736	ORC6;TFDP1;CCNE2;ESPL1;CDK4;HDAC1;CDK1;E2F2;E2F4;SMC1A;MCM2
Glycosylation and related congenital defects. WP4521	43946	0.0277132	0.654032	0	0	3.41151	12.2332	ALG8;ALG14;DOLK;ALG1
Photodynamic therapy-induced AP-1 survival signaling. WP3611	18415	0.0287216	0.645552	0	0	2.55864	9.08343	MAP2K3;TRAF5;BAX;TRAF2;BID;MAPK12
Non-homologous end joining WP438	43868	0.0394317	0.84599	0	0	6.09199	19.6965	RAD50;MRE11
DNA IR-Double Strand Breaks (DSBs) and cellular response via ATM WP3959	20241	0.0431416	0.885341	0	0	2.32603	7.31134	RAD50;MRE11;BAX;BRCA2;SMC1A;BID
TNF related weak inducer of apoptosis (TWEAK) Signaling Pathway WP2036	15462	0.0455285	0.895394	0	0	2.53833	7.84195	HDAC1;TNFSF12;TRAF5;RIPK1;TRAF2
Transcription co-factors SKI and SKIL protein partners WP4533	43908	0.0495932	0.936319	0	0	3.55366	10.6748	HDAC1;SIN3A;TEAD2
Apoptosis Modulation by HSP70 WP384	43909	0.0569048	1	0	0	3.36663	9.65001	CASP2;RIPK1;BID
TP53 Network WP1742	43909	0.0569048	0.99478	0	0	3.36663	9.65001	BAX;BID;BOK
Apoptosis Modulation and Signaling WP1772	33451	0.0635723	1	0	0	1.87446	5.16522	DIABLO;TNFRSF10C;CASP2;BAX;RIPK1;BID;MYD88;BOK
Nanomaterial induced apoptosis WP2507	43910	0.0646942	1	0	0	3.19829	8.7572	DIABLO;BAX;BID
Fluoropyrimidine Activity WP1601	12145	0.0669839	1	0	0	2.58448	6.98663	ABCC4;RRM1;GGH;TK1
p38 MAPK Signaling Pathway WP400	12510	0.0732243	1	0	0	2.50847	6.5577	RIPK1;TRAF2;TGFBR1;HMGN1
Hepatitis C and Hepatocellular Carcinoma WP3646	18019	0.0784758	1	0	0	2.17571	5.53711	CTTN;NOS2;PODXL;E2F2;TGFBR1
Globo Sphingolipid Metabolism WP1424	43912	0.0816357	1	0	0	2.90754	7.28481	GCNT1;FUT2;GBGT1
Zinc homeostasis WP3529	13241	0.0865503	1	0	0	2.36911	5.79727	SLC30A6;SLC39A6;SLC39A10;SLC39A4
TGF-beta Signaling Pathway WP366	10/132	0.0918854	1	0	0	1.6153	3.85607	MAP2K3;UBE2I;TFDP1;SIN3A;HDAC1;LIMK2;CDK1;SNIP1;E2F4;TGFBR1
Integrated Breast Cancer Pathway WP1984	11/151	0.0984595	1	0	0	1.55326	3.60062	MSH6;SMAD1;GSK3A;RAD50;MRE11;CDK4;HDAC1;BAX;BRCA2;BID;TGFBR1
Photodynamic therapy-induced NFE2L2 (NRF2) survival signaling WP3612	43914	0.100263	1	0	0	2.66525	6.12995	ABCC4;NQO2;MAPK12
Parkinsons Disease Pathway WP2371	13971	0.100961	1	0	0	2.24442	5.14651	CCNE2;CASP2;UBE2G2;MAPK12
Pyrimidine metabolism WP4022	31229	0.103781	1	0	0	1.75593	3.97801	POLD3;RRM1;POLA2;POLE3;POLR3H;TK1;POLE
G13 Signaling Pathway WP524	14336	0.108554	1	0	0	2.18687	4.85596	CFL1;LIMK1;ARHGDIG;SH3RF1
Signal Transduction of S1P Receptor WP26	43915	0.110156	1	0	0	2.55864	5.64398	PLCB3;GNAI3;MAPK12
Valproic acid pathway WP3871	43874	0.12181	1	0	0	3.2803	6.906	HDAC1;HSD17B10
Pancreatic adenocarcinoma pathway WP4263	32690	0.124113	1	0	0	1.67701	3.49918	CDK4;PRKCD;PIK3R3;E2F2;BAX;BRCA2;TGFBR1
H19 action Rb-E2F1 signaling and CDK-Beta-catenin activity WP3969	43875	0.137878	1	0	0	3.04599	6.0353	CDK4;TULP3
Ciliary landscape WP4352	14/216	0.138775	1	0	0	1.38198	2.72928	CTSA;POM121;RBM14;TRAF3IP1;HDAC1;CNOT10;DYNLL1;IQGAP3;APMAP;MFAP1;VAPB;CD2BP2;ANKS6;MCM2
TNF alpha Signaling Pathway WP231	33786	0.140591	1	0	0	1.62232	3.18284	MAP2K3;DIABLO;PSMD2;BAX;TRAF2;RIPK1;BID
TLR4 Signaling and Tolerance WP3851	43918	0.141887	1	0	0	2.2845	4.461	IRF3;RIPK1;MYD88
G Protein Signaling Pathways WP35	34151	0.146308	1	0	0	1.60488	3.08465	GNAZ;PLCB3;PDE4C;PRKCD;GNAI3;ADCY3;PDE7A
RIG-I-like Receptor Signaling WP3865	22037	0.14968	1	0	0	1.77683	3.37466	TKFC;IRF3;TRAF2;RIPK1;MAPK12
MAPK Cascade WP422	43919	0.153072	1	0	0	2.20572	4.1398	MAP2K3;PLCB3;MAPK12
T-Cell Receptor and Co-stimulatory Signaling WP2583	43919	0.153072	1	0	0	2.20572	4.1398	GSK3A;RASA1;RASGRP1
GPR40 Pathway WP3958	43876	0.154371	1	0	0	2.84293	5.31171	PLCB3;PLCG2
Regulation of sister chromatid separation at the metaphase-anaphase transition WP4240	43876	0.154371	1	0	0	2.84293	5.31171	ESPL1;SMC1A
Oxidation by Cytochrome P450 WP43	22402	0.157191	1	0	0	1.7477	3.23376	CYP27B1;CYP26A1;CYP27C1;CYP11A1;CYP1B1
Prostaglandin Synthesis and Regulation WP98	16528	0.158999	1	0	0	1.89529	3.48516	ABCC4;CYP11A1;ANXA5;S100A10
One Carbon Metabolism WP241	43920	0.164523	1	0	0	2.1322	3.84799	MTFMT;TCN2;DNMT3A
Pathways Regulating Hippo Signaling WP4540	35977	0.17647	1	0	0	1.523	2.6418	PLCB3;PRKCD;KIT;GNAI3;CDH24;FGFR4;TEAD2
Signaling Pathways in Glioblastoma WP2261	30103	0.186655	1	0	0	1.56014	2.61869	MAP2K3;MSH6;CDK4;PRKCD;PLCG2;BRCA2
Pathways Affected in Adenoid Cystic Carcinoma WP3651	23863	0.188689	1	0	0	1.64015	2.73521	MYCN;UHRF1;NSD1;SMC1A;FGFR4
Non-small cell lung cancer WP4255	24228	0.196895	1	0	0	1.6153	2.625	CDK4;PLCG2;PIK3R3;E2F2;BAX
Toll-like Receptor Signaling Pathway WP75	7/103	0.209027	1	0	0	1.44907	2.26821	MAP2K3;IRF3;PIK3R3;RIPK1;IRF5;MYD88;MAPK12
Sulindac Metabolic Pathway WP2542	43835	0.21353	1	0	0	4.26439	6.58412	CYP1B1
Non-genomic actions of 1,25 dihydroxyvitamin D3 WP4341	26054	0.23961	1	0	0	1.50155	2.14532	CYP27B1;PLCB3;PRKCD;PLCG2;MAPK12
BMP Signaling Pathway in Eyelid Development WP3927	43881	0.240798	1	0	0	2.1322	3.03582	SMAD1;FOXC1
Imatinib and Chronic Myeloid Leukemia WP3640	43881	0.240798	1	0	0	2.1322	3.03582	BCR;KIT
TGF-beta Receptor Signaling WP560	19815	0.246769	1	0	0	1.5794	2.21006	FKBP1A;SMAD1;ZNF423;TGFBR1
Fibrin Complement Receptor 3 Signaling Pathway WP4136	13575	0.250276	1	0	0	1.72881	2.39473	NOS2;IRF3;MYD88
Photodynamic therapy-induced HIF-1 survival signaling WP3614	13575	0.250276	1	0	0	1.72881	2.39473	NOS2;BAX;BID
The effect of progerin on the involved genes in Hutchinson-Gilford Progeria Syndrome WP4320	13575	0.250276	1	0	0	1.72881	2.39473	HDAC1;CBX1;MTA2
exRNA mechanism of action and biogenesis WP2805	43836	0.250425	1	0	0	3.55366	4.92038	DGCR8
miRNA Biogenesis WP2338	43836	0.250425	1	0	0	3.55366	4.92038	DGCR8
Corticotropin-releasing hormone signaling pathway WP2355	34121	0.270729	1	0	0	1.37561	1.79742	POMC;GNAZ;NR4A1;CYP11A1;PRKCD;PLCG2
Hfe effect on hepcidin production WP3924	43837	0.285591	1	0	0	3.04599	3.81723	BMP6
Breast cancer pathway WP4262	9/154	0.297359	1	0	0	1.24609	1.51127	RAD50;MRE11;FRAT2;CDK4;KIT;PIK3R3;E2F2;BAX;BRCA2
Triacylglyceride Synthesis WP325	43885	0.311402	1	0	0	1.77683	2.07298	AGPAT5;PLPP2
miRNA regulation of p53 pathway in prostate cancer WP3982	43885	0.311402	1	0	0	1.77683	2.07298	BAX;BID
Splicing factor NOVA regulated synaptic proteins WP4148	15401	0.314875	1	0	0	1.523	1.75994	GABBR2;EPB41;STXBP2
Spinal Cord Injury WP2431	7/118	0.317282	1	0	0	1.26486	1.45201	FKBP1A;EPHA4;NR4A1;NOS2;CDK4;CDK1;LTB4R
Effects of Nitric Oxide WP1995	43838	0.319108	1	0	0	2.66525	3.04431	NOS2
Glucocorticoid and Mineralcorticoid Metabolism WP237	43838	0.319108	1	0	0	2.66525	3.04431	CYP11A1
Ectoderm Differentiation WP2858	8/138	0.320981	1	0	0	1.23606	1.40462	CLDN11;ABCC4;PODXL;ARHGDIG;HESX1;FOXL1;PDE7A;TSKU
Eukaryotic Transcription Initiation WP405	15766	0.327892	1	0	0	1.48758	1.65876	GTF2A2;ERCC3;POLR3H
Differentiation of white and brown adipocyte WP2895	43886	0.328901	1	0	0	1.70576	1.8968	SMAD1;ZNF423
Circadian rhythm related genes WP3594	11/201	0.343527	1	0	0	1.16687	1.24679	MAGEL2;NAGLU;NOS2;DHX9;CDK4;SIN3A;HDAC1;SIX3;HNRNPD;CCAR2;ADA
PPAR Alpha Pathway WP2878	43887	0.346276	1	0	0	1.64015	1.73941	CDK4;CDK1
EGF/EGFR Signaling Pathway WP437	9/162	0.349865	1	0	0	1.18455	1.24403	PLSCR1;SH3KBP1;SH2D2A;RASA1;LIMK2;CFL1;PRKCD;STAM;AP2M1
ATR Signaling WP3875	43839	0.351055	1	0	0	2.36911	2.48001	RPA1
Benzo(a)pyrene metabolism WP696	43839	0.351055	1	0	0	2.36911	2.48001	CYP1B1
Heme Biosynthesis WP561	43839	0.351055	1	0	0	2.36911	2.48001	PPOX
Notch Signaling WP268	16497	0.353898	1	0	0	1.42146	1.47654	LFNG;HDAC1;MAML1
Viral Acute Myocarditis WP4298	30803	0.358993	1	0	0	1.26916	1.3002	RASA1;CASP2;BAX;BID;EIF4G2
Canonical and Non-canonical Notch signaling WP3845	43888	0.363499	1	0	0	1.5794	1.59832	MFAP1;MAML1
Human Thyroid Stimulating Hormone (TSH) signaling pathway WP2032	24198	0.374625	1	0	0	1.29224	1.26876	MAP2K3;CDK4;GNAI3;ADCY3
ncRNAs involved in Wnt signaling in hepatocellular carcinoma WP4336	31533	0.377802	1	0	0	1.23965	1.20666	PORCN;FRAT2;ROR1;NOTUM;ELAVL1
Mammary gland development pathway - Involution (Stage 4 of 4) WP2815	43840	0.381504	1	0	0	2.1322	2.05466	BAX
Vitamin D Metabolism WP1531	43840	0.381504	1	0	0	2.1322	2.05466	CYP27B1
Rett syndrome causing genes WP4312	17593	0.392629	1	0	0	1.33262	1.24586	GABBR2;HDAC1;SMC1A
RAC1/PAK1/p38/MMP2 Pathway WP3303	24929	0.396113	1	0	0	1.25423	1.16149	NOS2;RASA1;BAX;MAPK12
Cannabinoid receptor signaling WP3869	43890	0.397396	1	0	0	1.47048	1.35699	FAAH;MAPK12
Nucleotide GPCRs WP80	43841	0.410526	1	0	0	1.93836	1.72575	LTB4R
The alternative pathway of fetal androgen synthesis WP4524	43841	0.410526	1	0	0	1.93836	1.72575	CYP11A1
Parkin-Ubiquitin Proteasomal System pathway WP2359	25659	0.417478	1	0	0	1.2184	1.0643	PSMD4;PSMC3;PSMD2;UBE2G2
VEGFA-VEGFR2 Signaling Pathway WP3888	12/236	0.429086	1	0	0	1.08417	0.917311	MAP2K3;NR4A1;PLCB3;HDAC1;SH2D2A;PRKCD;CFL1;LIMK1;TNFRSF10C;STAM;ACP1;MAPK12
GABA receptor Signaling WP4159	11355	0.43043	1	0	0	1.37561	1.1596	GABBR2;AP2M1
Gastric Cancer Network 2 WP2363	11355	0.43043	1	0	0	1.37561	1.1596	FANCI;CHTF8
IL17 signaling pathway WP2112	11355	0.43043	1	0	0	1.37561	1.1596	IL17RB;IL17RA
Toll-like Receptor Signaling WP3858	11355	0.43043	1	0	0	1.37561	1.1596	IRF3;MYD88
Bile Acids synthesis and enterohepatic circulation WP4389	43842	0.438187	1	0	0	1.77683	1.46608	FGFR4
Bone Morphogenic Protein (BMP) Signalling and Regulation WP1425	43842	0.438187	1	0	0	1.77683	1.46608	SMAD1
Nanoparticle triggered regulated necrosis WP2513	43842	0.438187	1	0	0	1.77683	1.46608	RIPK1
Initiation of transcription and translation elongation at the HIV-1 LTR WP3414	11720	0.446584	1	0	0	1.33262	1.07427	CCNT1;HDAC1
White fat cell differentiation WP4149	11720	0.446584	1	0	0	1.33262	1.07427	IRF3;ZNF423
Apoptosis-related network due to altered Notch3 in ovarian cancer WP2864	19419	0.455658	1	0	0	1.2069	0.948642	NET1;HDAC1;ANXA5
Phosphodiesterases in neuronal function WP4222	19419	0.455658	1	0	0	1.2069	0.948642	PDE4C;ADCY3;PDE7A
Nuclear Receptors in Lipid Metabolism and Toxicity WP299	12086	0.462476	1	0	0	1.29224	0.996524	CYP27B1;CYP26A1
Resistin as a regulator of inflammation WP4481	12086	0.462476	1	0	0	1.29224	0.996524	PLCB3;PLCG2
Signal transduction through IL1R WP4496	12086	0.462476	1	0	0	1.29224	0.996524	MAP2K3;MYD88
BMP2-WNT4-FOXO1 Pathway in Human Primary Endometrial Stromal Cell Differentiation WP3876	43843	0.464552	1	0	0	1.64015	1.25747	SMAD1
Estrogen Receptor Pathway WP2881	43843	0.464552	1	0	0	1.64015	1.25747	CYP1B1
Purine metabolism WP4224	43843	0.464552	1	0	0	1.64015	1.25747	ADA
Vitamin B12 Disorders WP4271	43843	0.464552	1	0	0	1.64015	1.25747	TCN2
ncRNAs involved in STAT3 signaling in hepatocellular carcinoma WP4337	43843	0.464552	1	0	0	1.64015	1.25747	IL11
Insulin Signaling WP481	8/160	0.477988	1	0	0	1.0661	0.786961	MAP2K3;RPS6KA6;GSK3A;KIF3A;PRKCD;STXBP2;PIK3R3;MAPK12
Regulation of toll-like receptor signaling pathway WP1449	7/139	0.478701	1	0	0	1.07377	0.791023	MAP2K3;IRF3;PIK3R3;RIPK1;IRF5;MYD88;MAPK12
Classical pathway of steroidogenesis, including diseases WP4523	43845	0.513632	1	0	0	1.42146	0.947049	CYP11A1
GPCRs, Class C Metabotropic glutamate, pheromone WP501	43845	0.513632	1	0	0	1.42146	0.947049	GABBR2
Preimplantation Embryo WP3527	21245	0.515771	1	0	0	1.10286	0.730194	SIX3;SOX11;ELAVL1
Type II interferon signaling (IFNG) WP619	13547	0.523243	1	0	0	1.15254	0.74651	NOS2;PRKCD
miRNAs involvement in the immune response in sepsis WP4329	13547	0.523243	1	0	0	1.15254	0.74651	IRF5;MYD88
Nuclear Receptors Meta-Pathway WP2882	15/319	0.533507	1	0	0	1.0026	0.629917	IL11;ABCC4;AMIGO2;SLC39A10;SERPINB9;SMC1A;PRRG4;SLC6A8;CDK4;SLC39A6;CDK1;CYP1B1;BAX;LRRC8A;SLC39A4
Hedgehog Signaling Pathway WP47	43846	0.536459	1	0	0	1.33262	0.82991	SIN3A
Interactome of polycomb repressive complex 2 (PRC2) WP2916	43846	0.536459	1	0	0	1.33262	0.82991	BCLAF1
NAD+ metabolism WP3644	43846	0.536459	1	0	0	1.33262	0.82991	NADK
Amyotrophic lateral sclerosis (ALS) WP2447	13912	0.537697	1	0	0	1.12221	0.696286	BAX;BID
Nuclear Receptors WP170	13912	0.537697	1	0	0	1.12221	0.696286	NR4A1;ROR1
Mesodermal Commitment Pathway WP2857	7/147	0.538161	1	0	0	1.01533	0.629097	EOMES;ADAM19;SMAD1;FOXC1;TBX6;SOX21;TEAD2
Alzheimers Disease WP2059	30407	0.549957	1	0	0	1.02756	0.614397	PLCB3;BID;HSD17B10;CDK5R1
Prader-Willi and Angelman Syndrome WP3998	22341	0.550081	1	0	0	1.04862	0.626751	POMC;MAGEL2;CDK4
TYROBP Causal Network WP3945	22341	0.550081	1	0	0	1.04862	0.626751	ABCC4;SFT2D2;TGFBR1
Senescence and Autophagy in Cancer WP615	5/105	0.550543	1	0	0	1.01533	0.606001	MAP2K3;LAMP1;IRF5;ATG14;SLC39A4
Calcium Regulation in the Cardiac Cell WP536	7/149	0.552603	1	0	0	1.0017	0.594125	GJC1;FKBP1A;GNAZ;PLCB3;PRKCD;GNAI3;ADCY3
Amplification and Expansion of Oncogenic Pathways as Metastatic Traits WP3678	43847	0.558217	1	0	0	1.25423	0.731228	VHL
Canonical and Non-Canonical TGF-B signaling WP3874	43847	0.558217	1	0	0	1.25423	0.731228	TGFBR1
Drug Induction of Bile Acid Pathway WP2289	43847	0.558217	1	0	0	1.25423	0.731228	ABCC4
Leptin Insulin Overlap WP3935	43847	0.558217	1	0	0	1.25423	0.731228	PIK3R3
Serotonin and anxiety WP3947	43847	0.558217	1	0	0	1.25423	0.731228	POMC
Sulfation Biotransformation Reaction WP692	43847	0.558217	1	0	0	1.25423	0.731228	PAPSS1
miR-509-3p alteration of YAP1/ECM axis WP3967	43847	0.558217	1	0	0	1.25423	0.731228	TEAD2
Proteasome Degradation WP183	22706	0.561193	1	0	0	1.03171	0.596007	PSMD4;PSMC3;PSMD2
Glycogen Synthesis and Degradation WP500	14642	0.565685	1	0	0	1.0661	0.607376	GSK3A;PPP2R5D
Microglia Pathogen Phagocytosis Pathway WP3937	14642	0.565685	1	0	0	1.0661	0.607376	PLCG2;PIK3R3
Thermogenesis WP4321	5/108	0.5758	1	0	0	0.987128	0.54489	MAP2K3;RPS6KA6;BMP8A;ADCY3;MAPK12
4-hydroxytamoxifen, Dexamethasone, and Retinoic Acids Regulation of p27 Expression WP3879	43848	0.578954	1	0	0	1.18455	0.647397	MAP2K3
Estrogen metabolism WP697	43848	0.578954	1	0	0	1.18455	0.647397	CYP1B1
Simplified Depiction of MYD88 Distinct Input-Output Pathway WP3877	43848	0.578954	1	0	0	1.18455	0.647397	MYD88
Simplified Interaction Map Between LOXL4 and Oxidative Stress Pathway WP3670	43848	0.578954	1	0	0	1.18455	0.647397	ANXA5
Endochondral Ossification WP474	23437	0.582912	1	0	0	0.999467	0.539431	ADAMTS4;KIF3A;BMP6
Hair Follicle Development: Cytodifferentiation (Part 3 of 3) WP2840	31868	0.587474	1	0	0	0.98032	0.521455	SMAD1;DLX3;LGR5;BMP6
Angiopoietin Like Protein 8 Regulatory Pathway WP3915	6/132	0.589513	1	0	0	0.96918	0.512171	MAP2K3;RPS6KA6;GSK3A;TRIP10;PIK3R3;MAPK12
Nucleotide Metabolism WP404	43849	0.598719	1	0	0	1.12221	0.575652	RRM1
Overview of nanoparticle effects WP3287	43849	0.598719	1	0	0	1.12221	0.575652	BAX
AGE/RAGE pathway WP2324	24167	0.603935	1	0	0	0.96918	0.488747	NOS2;PRKCD;MYD88
IL-6 signaling pathway WP364	15738	0.605335	1	0	0	0.991719	0.497816	HDAC1;PRKCD
MAPK Signaling Pathway WP382	11/246	0.607711	1	0	0	0.953421	0.474856	MAP2K3;NR4A1;RASA1;PRKCD;CACNA2D2;TRAF2;MAPK8IP2;FGFR4;RASGRP1;TGFBR1;MAPK12
Androgen receptor signaling pathway WP138	32964	0.614378	1	0	0	0.947643	0.461639	UBE2I;SIN3A;HDAC1;LIMK2
Hematopoietic Stem Cell Gene Regulation by GABP alpha/beta Complex WP3657	43850	0.617557	1	0	0	1.0661	0.513843	DNMT3A
Serotonin Receptor 2 and ELK-SRF/GATA4 signaling WP732	43850	0.617557	1	0	0	1.0661	0.513843	RASGRP1
Heart Development WP1591	16103	0.617927	1	0	0	0.96918	0.466549	SMAD1;FOXC1
Hedgehog Signaling Pathway WP4249	16103	0.617927	1	0	0	0.96918	0.466549	EVC2;KIF3A
Epithelial to mesenchymal transition in colorectal cancer WP4239	7/159	0.621589	1	0	0	0.938703	0.446331	MAP2K3;CLDN11;EIF5A2;PIK3R3;TGFBR1;MAPK12;CRB3
Vitamin D Receptor Pathway WP2877	8/182	0.624676	1	0	0	0.937229	0.440988	CYP27B1;CST1;SALL4;IRF5;STAM;RASGRP1;EPHB4;BMP6
Metapathway biotransformation Phase I and II WP702	8/183	0.63081	1	0	0	0.932108	0.42947	CYP27B1;CYP26A1;CYP27C1;HS3ST3A1;GLYATL1;CYP11A1;CYP1B1;NAT9
Wnt Signaling WP428	5/115	0.63166	1	0	0	0.927042	0.425886	PORCN;PLCB3;FRAT2;ROR1;NOTUM
Tamoxifen metabolism WP691	43851	0.635511	1	0	0	1.01533	0.460276	CYP1B1
Aryl Hydrocarbon Receptor Pathway WP2873	16834	0.642178	1	0	0	0.927042	0.410578	CYP1B1;BAX
Regulation of Microtubule Cytoskeleton WP2038	16834	0.642178	1	0	0	0.927042	0.410578	LIMK1;CDK1
Tryptophan metabolism WP465	16834	0.642178	1	0	0	0.927042	0.410578	CYP1B1;HSD17B10
LncRNA involvement in canonical Wnt signaling and colorectal cancer WP4258	34425	0.648506	1	0	0	0.907318	0.392944	PORCN;FRAT2;ROR1;NOTUM
Methionine De Novo and Salvage Pathway WP3580	43852	0.652624	1	0	0	0.96918	0.413602	MTAP
Type II diabetes mellitus WP1584	43852	0.652624	1	0	0	0.96918	0.413602	PRKCD
Vitamin D in inflammatory diseases WP4482	43852	0.652624	1	0	0	0.96918	0.413602	MAP2K3
Differentiation Pathway WP2848	17564	0.665197	1	0	0	0.888415	0.362182	IL11;KIT
Hippo-Merlin Signaling Dysregulation WP4541	5/120	0.668691	1	0	0	0.888415	0.357528	CUL4A;KIT;CDH24;FGFR4;TEAD2
Hippo-Yap signaling pathway WP4537	43853	0.668933	1	0	0	0.927042	0.372736	TEAD2
Nanoparticle triggered autophagic cell death WP2509	43853	0.668933	1	0	0	0.927042	0.372736	ATG14
Chromosomal and microsatellite instability in colorectal cancer WP4216	26724	0.671829	1	0	0	0.876245	0.348527	MSH6;BAX;TGFBR1
Structural Pathway of Interleukin 1 (IL-1) WP2637	17930	0.676252	1	0	0	0.870284	0.340446	MAP2K3;MYD88
Angiogenesis WP1539	43854	0.684478	1	0	0	0.888415	0.336797	SMAD1
IL1 and megakaryocytes in obesity WP2865	43854	0.684478	1	0	0	0.888415	0.336797	MYD88
Synaptic Vesicle Pathway WP2267	18660	0.697467	1	0	0	0.836155	0.301267	SYN3;AP2M1
Leptin signaling pathway WP2034	27820	0.698179	1	0	0	0.841656	0.30239	GSK3A;PLCG2;BAX
Hypothesized Pathways in Pathogenesis of Cardiovascular Disease WP3668	43855	0.699294	1	0	0	0.852878	0.305061	TGFBR1
MTHFR deficiency WP4288	43855	0.699294	1	0	0	0.852878	0.305061	DNMT3A
Physiological and Pathological Hypertrophy of the Heart WP1528	43855	0.699294	1	0	0	0.852878	0.305061	MAP2K3
Neural Crest Differentiation WP2064	4/101	0.703237	1	0	0	0.844434	0.297293	DMBX1;SMAD1;HDAC1;TBX6
Copper homeostasis WP3286	19025	0.707636	1	0	0	0.820075	0.283603	SLC31A2;COX11
Wnt Signaling Pathway WP363	19025	0.707636	1	0	0	0.820075	0.283603	GSK3A;ROR1
Regulation of Actin Cytoskeleton WP51	6/150	0.710885	1	0	0	0.852878	0.29104	DIAPH3;CFL1;LIMK1;RASSF7;PIK3R3;FGFR4
Cytokines and Inflammatory Response WP530	43856	0.713415	1	0	0	0.820075	0.276933	IL11
EPO Receptor Signaling WP581	43856	0.713415	1	0	0	0.820075	0.276933	RASA1
Wnt/beta-catenin Signaling Pathway in Leukemia WP3658	43856	0.713415	1	0	0	0.820075	0.276933	SALL4
Intraflagellar transport proteins binding to dynein WP4532	43857	0.726873	1	0	0	0.789702	0.251918	DYNLL1
Sphingolipid pathway WP1422	43857	0.726873	1	0	0	0.789702	0.251918	CERS5
Cardiac Hypertrophic Response WP2795	20121	0.736437	1	0	0	0.775344	0.237202	MAP2K3;TGFBR1
IL-1 signaling pathway WP195	20121	0.736437	1	0	0	0.775344	0.237202	MAP2K3;MYD88
RANKL/RANK (Receptor activator of NFKB (ligand)) Signaling Pathway WP2018	20121	0.736437	1	0	0	0.775344	0.237202	TRAF5;TRAF2
Nanoparticle-mediated activation of receptor signaling WP2643	43858	0.7397	1	0	0	0.761499	0.2296	MAPK12
Lipid Metabolism Pathway WP3965	43859	0.751925	1	0	0	0.73524	0.209631	ABHD5
PDGFR-beta pathway WP3972	43859	0.751925	1	0	0	0.73524	0.209631	RASA1
Statin Pathway WP430	43859	0.751925	1	0	0	0.73524	0.209631	PDIA2
miRs in Muscle Cell Differentiation WP2012	43859	0.751925	1	0	0	0.73524	0.209631	PRKCD
Dopaminergic Neurogenesis WP2855	43860	0.763576	1	0	0	0.710732	0.191714	NKX2-2
Extracellular vesicle-mediated signaling in recipient cells WP2870	43860	0.763576	1	0	0	0.710732	0.191714	TGFBR1
Matrix Metalloproteinases WP129	43860	0.763576	1	0	0	0.710732	0.191714	MMP24
Oligodendrocyte Specification and differentiation(including remyelination), leading to Myelin Components for CNS WP4304	43860	0.763576	1	0	0	0.710732	0.191714	NKX2-2
PI3K-AKT-mTOR signaling pathway and therapeutic opportunities WP3844	43860	0.763576	1	0	0	0.710732	0.191714	PIK3R3
Ethanol effects on histone modifications WP3996	43861	0.774681	1	0	0	0.687805	0.175599	HDAC1
Factors and pathways affecting insulin-like growth factor (IGF1)-Akt signaling WP3850	43861	0.774681	1	0	0	0.687805	0.175599	TNFSF9
Trans-sulfuration and one carbon metabolism WP2525	43861	0.774681	1	0	0	0.687805	0.175599	DNMT3A
Tumor suppressor activity of SMARCB1 WP4204	43861	0.774681	1	0	0	0.687805	0.175599	CDK4
Constitutive Androstane Receptor Pathway WP2875	11689	0.785265	1	0	0	0.666311	0.16107	SMC1A
Development and heterogeneity of the ILC family WP3893	11689	0.785265	1	0	0	0.666311	0.16107	EOMES
Ovarian Infertility Genes WP34	11689	0.785265	1	0	0	0.666311	0.16107	CDK4
Notch Signaling Pathway WP61	22313	0.786813	1	0	0	0.699081	0.167614	MAML1;HDAC1
MECP2 and Associated Rett Syndrome WP3584	22678	0.794334	1	0	0	0.687805	0.158368	SIN3A;HDAC1
Alpha 6 Beta 4 signaling pathway WP244	12055	0.795352	1	0	0	0.64612	0.147942	PRKCD
Monoamine GPCRs WP58	12055	0.795352	1	0	0	0.64612	0.147942	HTR1D
Pregnane X Receptor pathway WP2876	12055	0.795352	1	0	0	0.64612	0.147942	ABCC4
ESC Pluripotency Pathways WP3931	4/116	0.79906	1	0	0	0.73524	0.164929	MAP2K3;SMAD1;FGFR4;MAPK12
Endometrial cancer WP4155	23043	0.801619	1	0	0	0.676888	0.149674	PIK3R3;BAX
Signaling of Hepatocyte Growth Factor Receptor WP313	12420	0.804966	1	0	0	0.627117	0.136056	RASA1
Type 2 papillary renal cell carcinoma WP4241	12420	0.804966	1	0	0	0.627117	0.136056	VHL
NRF2 pathway WP2884	5/146	0.820244	1	0	0	0.730204	0.144693	ABCC4;SLC6A8;SLC39A6;SLC39A10;SLC39A4
Target Of Rapamycin (TOR) Signaling WP1471	13150	0.822861	1	0	0	0.592277	0.115475	FKBP1A
Histone Modifications WP2369	24504	0.828514	1	0	0	0.636476	0.119735	NSD1;SMYD4
Melatonin metabolism and effects WP3298	13516	0.831184	1	0	0	0.576269	0.106555	CYP1B1
Sleep regulation WP3591	13881	0.839116	1	0	0	0.561104	0.0984212	ADA
Striated Muscle Contraction Pathway WP383	13881	0.839116	1	0	0	0.561104	0.0984212	TNNT1
B Cell Receptor Signaling Pathway WP23	35490	0.839197	1	0	0	0.659442	0.115606	GSK3A;PRKCD;PLCG2
AMP-activated Protein Kinase (AMPK) Signaling WP1403	25235	0.840692	1	0	0	0.618028	0.107246	PIK3R3;ELAVL1
PDGF Pathway WP2526	14246	0.846676	1	0	0	0.546717	0.0909942	RASA1
Bladder Cancer WP2828	14611	0.853881	1	0	0	0.533049	0.0842025	CDK4
IL-5 Signaling Pathway WP127	14611	0.853881	1	0	0	0.533049	0.0842025	GSK3A
Oxidative Damage WP3941	14611	0.853881	1	0	0	0.533049	0.0842025	TRAF2
Primary Focal Segmental Glomerulosclerosis FSGS WP2572	26330	0.857492	1	0	0	0.592277	0.091059	PODXL;MKI67
Nonalcoholic fatty liver disease WP4396	5/155	0.857523	1	0	0	0.687805	0.10572	GSK3A;PIK3R3;BAX;TRAF2;BID
Adipogenesis WP236	4/130	0.86434	1	0	0	0.65606	0.0956464	BSCL2;CYP26A1;E2F4;ZMPSTE24
Ras Signaling WP4223	6/184	0.867223	1	0	0	0.695281	0.0990492	RASA1;KIT;PLCG2;PIK3R3;FGFR4;RASGRP1
Vitamin A and Carotenoid Metabolism WP716	15707	0.873529	1	0	0	0.49586	0.0670474	CYP26A1
Interleukin-11 Signaling Pathway WP2332	16072	0.879473	1	0	0	0.48459	0.0622372	IL11
Chemokine signaling pathway WP3929	5/164	0.888115	1	0	0	0.65006	0.0771322	PLCB3;PRKCD;GNAI3;PIK3R3;ADCY3
Aryl Hydrocarbon Receptor WP2586	16803	0.890537	1	0	0	0.463521	0.0537363	CYP1B1
Selenium Metabolism and Selenoproteins WP28	16803	0.890537	1	0	0	0.463521	0.0537363	SELENOH
Energy Metabolism WP1541	17168	0.895683	1	0	0	0.453659	0.0499792	HDAC1
Mechanoregulation and pathology of YAP/TAZ via Hippo and non-Hippo mechanisms WP4534	17168	0.895683	1	0	0	0.453659	0.0499792	TEAD2
NO/cGMP/PKG mediated Neuroprotection WP4008	17168	0.895683	1	0	0	0.453659	0.0499792	NOS2
Exercise-induced Circadian Regulation WP410	17533	0.900586	1	0	0	0.444208	0.0465126	EIF4G2
Endoderm Differentiation WP2853	4/141	0.902023	1	0	0	0.604878	0.0623723	EOMES;MAP2K3;SOX21;ELAVL1
MicroRNAs in cardiomyocyte hypertrophy WP1544	30713	0.909668	1	0	0	0.507666	0.0480635	MAP2K3;PIK3R3
Synaptic signaling pathways associated with autism spectrum disorder WP4539	18264	0.909714	1	0	0	0.426439	0.0403517	PIK3R3
Vitamin B12 Metabolism WP1533	18264	0.909714	1	0	0	0.426439	0.0403517	TCN2
Brain-Derived Neurotrophic Factor (BDNF) signaling pathway WP2380	4/144	0.91055	1	0	0	0.592277	0.0555003	DOCK3;CFL1;PRKCD;CDK5R1
Selenium Micronutrient Network WP15	31444	0.916396	1	0	0	0.49586	0.0432921	PRDX4;SELENOH
One carbon metabolism and related pathways WP3940	18994	0.918005	1	0	0	0.410038	0.0350799	DNMT3A
Cardiac Progenitor Differentiation WP2406	19360	0.92186	1	0	0	0.402301	0.0327319	KIT
Interferon type I signaling pathways WP585	19725	0.925535	1	0	0	0.394851	0.0305551	MAP2K3
Cytoplasmic Ribosomal Proteins WP477	32540	0.92561	1	0	0	0.479145	0.0370392	RPS6KA6;RPLP1
Hematopoietic Stem Cell Differentiation WP2849	20090	0.929036	1	0	0	0.387672	0.0285355	IRF5
Pathogenic Escherichia coli infection WP2272	20090	0.929036	1	0	0	0.387672	0.0285355	CTTN
ErbB Signaling Pathway WP673	33270	0.931211	1	0	0	0.468615	0.033398	PLCG2;PIK3R3
Myometrial Relaxation and Contraction Pathways WP289	4/156	0.938411	1	0	0	0.546717	0.0347531	PLCB3;PRKCD;PLCG2;ADCY3
Kit receptor signaling pathway WP304	21551	0.941474	1	0	0	0.361389	0.0217949	KIT
MET in type 1 papillary renal cell carcinoma WP4205	21551	0.941474	1	0	0	0.361389	0.0217949	PIK3R3
Ebola Virus Pathway on Host WP4217	3/129	0.944867	1	0	0	0.49586	0.0281205	IRF3;VPS33A;PIK3R3
T-Cell antigen Receptor (TCR) pathway during Staphylococcus aureus infection WP3863	22647	0.949351	1	0	0	0.343903	0.0178751	CDK4
Genotoxicity pathway WP4286	23012	0.951733	1	0	0	0.338444	0.016743	CCP110
Lung fibrosis WP3624	23012	0.951733	1	0	0	0.338444	0.016743	ELN
Integrin-mediated Cell Adhesion WP185	2/101	0.953712	1	0	0	0.422217	0.0200103	MAP2K3;MAPK12
Oncostatin M Signaling Pathway WP2374	23743	0.956168	1	0	0	0.32803	0.0147028	PRKCD
Association Between Physico-Chemical Features and Toxicity Associated Pathways WP3680	24108	0.95823	1	0	0	0.32306	0.013784	ACTR3
Sterol Regulatory Element-Binding Proteins (SREBP) signalling WP1982	25204	0.963854	1	0	0	0.309014	0.0113766	GSK3A
DNA Damage Response (only ATM dependent) WP710	2/110	0.96779	1	0	0	0.387672	0.0126924	PIK3R3;BAX
Arrhythmogenic Right Ventricular Cardiomyopathy WP2118	27030	0.971596	1	0	0	0.288135	0.00830272	CACNA2D2
Peptide GPCRs WP24	27030	0.971596	1	0	0	0.288135	0.00830272	GRPR
Prolactin Signaling Pathway WP2037	27760	0.974207	1	0	0	0.280552	0.00733127	NOS2
PI3K-Akt Signaling Pathway WP4172	9/340	0.980389	1	0	0	0.564405	0.0111786	CCNE2;PKN3;CDK4;KIT;LPAR2;PIK3R3;PPP2R5D;FGFR4;EIF4E2
Pathways in clear cell renal cell carcinoma WP4018	31048	0.983289	1	0	0	0.250847	0.00422729	VHL
T-Cell antigen Receptor (TCR) Signaling Pathway WP69	32874	0.986871	1	0	0	0.236911	0.00313107	PRKCD
GPCRs, Other WP117	33239	0.987489	1	0	0	0.234307	0.00294988	GRPR
Focal Adhesion-PI3K-Akt-mTOR-signaling pathway WP3932	7/303	0.98938	1	0	0	0.492587	0.0052593	NOS2;KIT;LPAR2;PPP2R5D;FGFR4;EIF4E2;ELAVL1
Human Complement System WP2806	35431	0.990634	1	0	0	0.219814	0.00206844	GNAI3
Wnt Signaling Pathway and Pluripotency WP399	1/102	0.992642	1	0	0	0.209039	0.00154372	PRKCD
Electron Transport Chain (OXPHOS system in mitochondria) WP111	1/103	0.992989	1	0	0	0.207009	0.00145644	COX11
Sudden Infant Death Syndrome (SIDS) Susceptibility Pathways WP706	2/158	0.995662	1	0	0	0.269898	0.0011733	HDAC1;NKX2-2
GPCRs, Class A Rhodopsin-like WP455	3/257	0.999613	1	0	0	0.248894	9.62691e-05	HTR1D;GRPR;LTB4R
Focal Adhesion WP306	1/198	0.999926	1	0	0	0.107687	7.94121e-06	PIK3R3

## Sheet: cluster 6
Term	Overlap	P-value	Adjusted P-value	Old P-value	Old Adjusted P-value	Odds Ratio	Combined Score	Genes
Hypothesized Pathways in Pathogenesis of Cardiovascular Disease WP3668	44007	0.000884911	0.417678	0	0	5.09014	35.7838	POSTN;SERPINE1;AGTR1;NR2C2;TGFBR2;FBN1
G Protein Signaling Pathways WP35	34304	0.00139104	0.328285	0	0	2.73663	18.0008	AKAP13;AKAP11;ADCY9;RRAS;PRKAR2B;PDE4D;PDE1A;GNG7;PRKAR2A;AKAP6;PDE7B;ADCY5
Type II diabetes mellitus WP1584	43973	0.00310393	0.488352	0	0	4.82021	27.8371	KCNJ11;INSR;PDX1;SLC2A4;PHKA2
Phosphodiesterases in neuronal function WP4222	19572	0.00318917	0.376323	0	0	3.20134	18.4013	ADCY9;PDE4D;PDE1A;PDE3B;PDE6D;DRD1;PDE7B;ADCY5
Arrhythmogenic Right Ventricular Cardiomyopathy WP2118	27273	0.00784925	0.740969	0	0	2.57946	12.5035	CACNB1;CACNB2;SGCD;LAMA2;SGCB;ITGA3;ITGA1;ITGA11;DMD
Pathways Affected in Adenoid Cystic Carcinoma WP3651	23955	0.0110862	0.872114	0	0	2.61033	11.7518	MAX;NFIB;KMT2C;ATRX;ARID5B;ATM;SMARCA2;CMTR2
Thermogenesis WP4321	11/108	0.0129478	0.873054	0	0	2.16017	9.38987	PRKAA1;SMARCC2;ADCY9;KDM3B;CPT2;RPS6KA2;SLC25A20;SMARCA2;ARID1B;MAP3K5;ADCY5
Nuclear Receptors Meta-Pathway WP2882	24/319	0.0167118	0.985996	0	0	1.59565	6.52884	NCOA1;EGR1;GSTM2;SLC27A1;ABCB4;ABCC5;TNFAIP3;SLC2A4;NR3C1;CES4A;SLC6A4;TGFBR2;AKAP13;SRPX2;SCP2;CPT2;NAV3;CDC42EP3;CYP1A1;ANGPTL4;POLK;FGF13;SQSTM1;EPHA3
Transcription factor regulation in adipogenesis WP3599	43943	0.0182166	0.955362	0	0	3.85617	15.4456	CEBPD;INSR;SLC2A4;NR3C1
miRNA targets in ECM and membrane receptors WP2911	43943	0.0182166	0.859826	0	0	3.85617	15.4456	COL1A2;ITGA1;ITGA11;LAMC1
mir-124 predicted interactions with cell cycle and differentiation WP3595	43867	0.0293484	1	0	0	7.06964	24.9453	PRKAA1;STRADB
Fatty Acid Omega Oxidation WP206	43905	0.031093	1	0	0	4.24178	14.7223	ADH1B;CYP1A1;ADH6
Mitochondrial LC-Fatty Acid Beta-Oxidation WP368	43907	0.0433493	1	0	0	3.74275	11.7465	CPT2;SCP2;SLC25A20
Regulation of Wnt/B-catenin Signaling by Small Molecule Compounds WP3664	43907	0.0433493	1	0	0	3.74275	11.7465	FZD1;APC;CSNK1A1
Insulin signalling in human adipocytes (diabetic condition) WP3635	43869	0.0514614	1	0	0	5.30223	15.7313	INSR;SLC2A4
Insulin signalling in human adipocytes (normal condition) WP3634	43869	0.0514614	1	0	0	5.30223	15.7313	INSR;SLC2A4
ATM Signaling Network in Development and Disease WP3878	16558	0.0594906	1	0	0	2.35655	6.65002	PRKAA1;RNF8;HSPB1;ATM;MAP3K5
Heme Biosynthesis WP561	43870	0.0641398	1	0	0	4.71309	12.9454	FECH;UROS
Macrophage markers WP4146	43870	0.0641398	1	0	0	4.71309	12.9454	CD83;LYZ
Methylation Pathways WP704	43870	0.0641398	1	0	0	4.71309	12.9454	PNMT;HNMT
Regulation of Microtubule Cytoskeleton WP2038	16923	0.0642743	1	0	0	2.30532	6.32716	TRIO;ROCK1;APC;CFL2;MARK1
Leptin signaling pathway WP2034	27942	0.0667702	1	0	0	1.95345	5.28701	NCOA1;PRKAA1;CISH;ROCK1;CFL2;PDE3B;ACACB
p38 MAPK Signaling Pathway WP400	12510	0.0743608	1	0	0	2.49517	6.4845	MAX;HSPB1;MAP3K7;MAP3K5
Insulin Signaling WP481	12/160	0.0760512	1	0	0	1.59067	4.09812	CYTH3;EGR1;PRKAA1;RPS6KA2;INSR;GAB1;RAPGEF1;SLC2A4;MAP3K13;MAP3K7;RHOQ;MAP3K5
Nanoparticle triggered autophagic cell death WP2509	43913	0.0918699	1	0	0	2.76638	6.60441	MAP1LC3A;INSR;ATG9B
The human immune response to tuberculosis WP4197	43913	0.0918699	1	0	0	2.76638	6.60441	IFIT3;IRF9;IFNAR1
PTF1A related regulatory pathway WP4147	43872	0.0921229	1	0	0	3.85617	9.19553	PDX1;NKX6-1
Histone Modifications WP2369	24624	0.0954574	1	0	0	1.89931	4.46161	KMT2A;KMT2C;SETDB2;SMYD2;ASH1L;EZH1
Regulation of Actin Cytoskeleton WP51	11/150	0.0977523	1	0	0	1.55532	3.61661	RRAS;ROCK1;APC;CFL2;ITGA1;BRK1;ARHGEF4;EZR;FGF13;FGF12;ARHGAP35
AMP-activated Protein Kinase (AMPK) Signaling WP1403	25355	0.106221	1	0	0	1.84425	4.13525	PRKAA1;EEF2K;STRADB;INSR;SLC2A4;ACACB
MTHFR deficiency WP4288	43915	0.111478	1	0	0	2.54507	5.58369	SGMS1;CHDH;HNMT
Signal Transduction of S1P Receptor WP26	43915	0.111478	1	0	0	2.54507	5.58369	ASAH1;SPHK1;S1PR3
Hippo-Merlin Signaling Dysregulation WP4541	9/120	0.113708	1	0	0	1.59067	3.4583	PLCB4;PRKAR2B;ITGA3;PRKAR2A;INSR;ITGA11;ITGA1;CDH11;VGLL4
PPAR Alpha Pathway WP2878	43916	0.121831	1	0	0	2.44718	5.15162	SLC27A1;CPT2;SCP2
Wnt/beta-catenin Signaling Pathway in Leukemia WP3658	43916	0.121831	1	0	0	2.44718	5.15162	APC;CSNK1A1;RUNX1T1
Homologous recombination WP186	43874	0.12289	1	0	0	3.26291	6.84059	POLD4;ATM
Valproic acid pathway WP3871	43874	0.12289	1	0	0	3.26291	6.84059	HADHB;IVD
Mitochondrial complex I assembly model OXPHOS system WP4324	20576	0.123256	1	0	0	1.89365	3.96435	TIMMDC1;DMAC1;NDUFA10;NDUFAF3;NDUFC1
Fas Ligand (FasL) pathway and Stress induction of Heat Shock Proteins (HSP) regulation WP314	15432	0.134653	1	0	0	2.0199	4.05001	MAPKAPK3;HSPB1;MAP3K7;SPTAN1
DNA Damage Response (only ATM dependent) WP710	8/110	0.148025	1	0	0	1.54247	2.94669	FRAT1;SCP2;APC;INSR;CAT;ATM;PPP2R5C;MAP3K7
NRF2 pathway WP2884	10/146	0.152092	1	0	0	1.45266	2.73576	EGR1;GSTM2;ABCC5;SLC2A4;FGF13;SQSTM1;EPHA3;CES4A;SLC6A4;TGFBR2
Gastric Cancer Network 1 WP2361	43919	0.154805	1	0	0	2.19402	4.09315	SMOC2;RNF216;APC
Lipid Metabolism Pathway WP3965	43919	0.154805	1	0	0	2.19402	4.09315	PRKAA1;PRKAR2B;PRKAR2A
Adipogenesis WP236	9/130	0.160823	1	0	0	1.46831	2.68326	FZD1;NCOA1;CYP26B1;CEBPD;EPAS1;SERPINE1;NDN;SLC2A4;NR3C1
MECP2 and Associated Rett Syndrome WP3584	22767	0.167396	1	0	0	1.7104	3.05715	RBFOX1;CEBPD;GRID1;UBE3A;TAF1
Tryptophan metabolism WP465	16893	0.170377	1	0	0	1.84425	3.26385	AFMID;CAT;CYP1A1;UBE3A
Angiopoietin Like Protein 8 Regulatory Pathway WP3915	9/132	0.171231	1	0	0	1.44606	2.55193	PRKAA1;RPS6KA2;INSR;RAPGEF1;SLC2A4;MAP3K13;MAP3K7;RHOQ;MAP3K5
Interactome of polycomb repressive complex 2 (PRC2) WP2916	43877	0.172653	1	0	0	2.65111	4.6566	RBBP7;EZH1
IL17 signaling pathway WP2112	43921	0.178153	1	0	0	2.05247	3.54075	CEBPD;MAP3K7;IL17RC
Tumor suppressor activity of SMARCB1 WP4204	43921	0.178153	1	0	0	2.05247	3.54075	SMARCC2;ARID1B;GLI3
Exercise-induced Circadian Regulation WP410	17624	0.189356	1	0	0	1.76741	2.94119	PURA;STBD1;NR1D2;GFRA1
Amplification and Expansion of Oncogenic Pathways as Metastatic Traits WP3678	43878	0.189894	1	0	0	2.49517	4.1452	POSTN;EPAS1
Canonical and Non-Canonical TGF-B signaling WP3874	43878	0.189894	1	0	0	2.49517	4.1452	BMPR2;TGFBR2
Spinal Cord Injury WP2431	8/118	0.193465	1	0	0	1.43789	2.36196	LGALS3;EGR1;VCAN;CSPG4;CXCL1;SOX9;CD47;RTN4
Integrin-mediated Cell Adhesion WP185	7/101	0.199262	1	0	0	1.46992	2.37119	GIT2;ROCK1;ITGA3;ITGA11;ITGA1;RAPGEF1;TNS1
Alpha 6 Beta 4 signaling pathway WP244	12114	0.202382	1	0	0	1.92808	3.0803	LAMA2;GAB1;LAMC1
4-hydroxytamoxifen, Dexamethasone, and Retinoic Acids Regulation of p27 Expression WP3879	43879	0.207349	1	0	0	2.35655	3.70767	PRKAA1;MAP3K5
PPAR signaling pathway WP3942	24593	0.208206	1	0	0	1.58275	2.4837	SLC27A1;CPT2;SCP2;SLC27A6;ANGPTL4
Regulation of toll-like receptor signaling pathway WP1449	9/139	0.209962	1	0	0	1.37324	2.14339	CISH;RNF216;TAB3;TNFAIP3;MAP3K7;SQSTM1;IKBKE;TLR3;IFNAR1
Synthesis and Degradation of Ketone Bodies WP311	43835	0.214562	1	0	0	4.24178	6.52878	OXCT1
Fatty Acid Beta Oxidation WP143	12479	0.214771	1	0	0	1.87137	2.87851	HADHB;CPT2;SLC25A20
Signaling of Hepatocyte Growth Factor Receptor WP313	12479	0.214771	1	0	0	1.87137	2.87851	ITGA1;GAB1;RAPGEF1
Type 2 papillary renal cell carcinoma WP4241	12479	0.214771	1	0	0	1.87137	2.87851	EGLN3;EPAS1;COL21A1
ncRNAs involved in Wnt signaling in hepatocellular carcinoma WP4336	31564	0.219473	1	0	0	1.47969	2.24399	FZD1;FRAT1;APC;CSNK1A1;DKK2;MTDH
Serotonin Receptor 4/6/7 and NR3C Signaling WP734	43880	0.224961	1	0	0	2.23252	3.33053	EGR1;NR3C1
Small Ligand GPCRs WP247	43880	0.224961	1	0	0	2.23252	3.33053	PTGER3;S1PR3
VEGFA-VEGFR2 Signaling Pathway WP3888	14/236	0.225202	1	0	0	1.25816	1.87561	EGR1;PRKAA1;ROCK1;GAB1;FHL2;HSPB1;PTPRJ;SMARCA2;ACACB;TPCN2;INPP4B;RAPGEF1;EZR;MAP3K5
Focal Adhesion WP306	12/198	0.225591	1	0	0	1.28539	1.91399	MYL5;COL1A2;ROCK1;LAMA2;ITGA3;PDGFC;ITGA11;ITGA1;RAPGEF1;XIAP;LAMC1;ARHGAP35
Senescence and Autophagy in Cancer WP615	7/105	0.226487	1	0	0	1.41393	2.09978	MAP1LC3A;KMT2A;RB1CC1;SERPINE1;CXCL1;CXCL14;SQSTM1
Wnt Signaling Pathway WP363	19085	0.22912	1	0	0	1.63145	2.40396	FRAT1;APC;CSNK1A1;MAP3K7
Hematopoietic Stem Cell Gene Regulation by GABP alpha/beta Complex WP3657	43881	0.242676	1	0	0	2.12089	3.00324	ATM;ZFX
Hereditary leiomyomatosis and renal cell carcinoma pathway WP4206	43881	0.242676	1	0	0	2.12089	3.00324	PRKAA1;ACACB
SCFA and skeletal muscle substrate metabolism WP4030	43836	0.251604	1	0	0	3.53482	4.87769	SLC2A4
let-7 inhibition of ES cell reprogramming WP3299	43836	0.251604	1	0	0	3.53482	4.87769	EGR1
Type II interferon signaling (IFNG) WP619	13575	0.252784	1	0	0	1.71964	2.36488	IFI6;IRF8;IRF9
Pathogenic Escherichia coli infection WP2272	20180	0.260181	1	0	0	1.54247	2.07674	ROCK1;ARPC2;EZR;CLDN1
Nuclear Receptors WP170	13940	0.26567	1	0	0	1.67439	2.2194	NR1D2;NR3C1;NR2C2
MAPK Signaling Pathway WP382	14/246	0.272505	1	0	0	1.20701	1.56923	MAX;HSPB1;DUSP7;CACNA1G;TGFBR2;CACNB1;CACNB2;RRAS;MAPKAPK3;FGF13;MAP3K13;MAP3K7;FGF12;MAP3K5
Methionine De Novo and Salvage Pathway WP3580	43883	0.278223	1	0	0	1.92808	2.46666	CHDH;MTR
NAD+ biosynthetic pathways WP3645	43883	0.278223	1	0	0	1.92808	2.46666	PARP4;SIRT3
LncRNA involvement in canonical Wnt signaling and colorectal cancer WP4258	34486	0.282876	1	0	0	1.35376	1.70946	FZD1;FRAT1;APC;CSNK1A1;MAP3K7;DKK2
Integrated Breast Cancer Pathway WP1984	9/151	0.283282	1	0	0	1.26411	1.59443	USP15;BMPR2;RRAS;RALGAPA1;MAX;MYCBP2;ATM;MAP3K13;TGFBR2
Arachidonate Epoxygenase / Epoxide Hydrolase WP678	43837	0.286902	1	0	0	3.02984	3.78311	COX5A
DDX1 as a regulatory component of the Drosha microprocessor WP2942	43837	0.286902	1	0	0	3.02984	3.78311	ATM
EV release from cardiac cells and their functional effects WP3297	43837	0.286902	1	0	0	3.02984	3.78311	CXCL12
Mevalonate pathway WP3963	43837	0.286902	1	0	0	3.02984	3.78311	PMVK
Blood Clotting Cascade WP272	43884	0.295971	1	0	0	1.84425	2.24536	F8;SERPINE1
Glutathione metabolism WP100	43884	0.295971	1	0	0	1.84425	2.24536	GGT5;GSTM2
Wnt Signaling WP428	7/115	0.29927	1	0	0	1.29098	1.55744	FZD1;FRAT1;PLCB4;APC;CSNK1A1;MAP3K7;DKK2
Breast cancer pathway WP4262	9/154	0.302651	1	0	0	1.23948	1.4814	FZD1;NCOA1;HEYL;FRAT1;APC;CSNK1A1;HEY2;ATM;POLK
GPCRs, Class B Secretin-like WP334	43885	0.313652	1	0	0	1.76741	2.04926	GLP1R;SCTR
miRNA regulation of p53 pathway in prostate cancer WP3982	43885	0.313652	1	0	0	1.76741	2.04926	SERPINE1;ATM
Pathways Regulating Hippo Signaling WP4540	35947	0.31599	1	0	0	1.2985	1.49594	PRKAA1;PLCB4;PRKAR2B;PRKAR2A;INSR;CDH11
FTO Obesity Variant Mechanism WP3407	43838	0.320536	1	0	0	2.65111	3.01633	ARID5B
NAD Biosynthesis II (from tryptophan) WP2485	43838	0.320536	1	0	0	2.65111	3.01633	AFMID
Prader-Willi and Angelman Syndrome WP3998	22372	0.324262	1	0	0	1.39075	1.56627	PCM1;HERC2;NDN;UBE3A
IL-6 signaling pathway WP364	15766	0.330876	1	0	0	1.47969	1.63656	NCOA1;GAB1;MAP3K7
Heart Development WP1591	16132	0.343956	1	0	0	1.44606	1.5433	BMPR2;HEY2;IRX4
Wnt Signaling Pathway and Pluripotency WP399	6/102	0.349658	1	0	0	1.24758	1.31096	FZD1;FRAT1;APC;PPP2R5C;MAP3K7;FBXW2
Benzo(a)pyrene metabolism WP696	43839	0.352585	1	0	0	2.35655	2.45661	CYP1A1
Folate-Alcohol and Cancer Pathway Hypotheses WP1589	43839	0.352585	1	0	0	2.35655	2.45661	MTR
Metabolism of Spingolipids in ER and Golgi apparatus WP4142	43839	0.352585	1	0	0	2.35655	2.45661	SPHK1
NLR Proteins WP288	43839	0.352585	1	0	0	2.35655	2.45661	MAP3K7
Tgif disruption of Shh signaling WP3674	43839	0.352585	1	0	0	2.35655	2.45661	GLI3
Focal Adhesion-PI3K-Akt-mTOR-signaling pathway WP3932	16/303	0.35686	1	0	0	1.11994	1.154	PRKAA1;LAMA2;EPAS1;ITGA3;INSR;HIF3A;SLC2A4;LAMC1;PPP2R5C;COL1A2;GNG7;PDGFC;ITGA11;FGF13;FGF12;IFNAR1
Prostaglandin Synthesis and Regulation WP98	16497	0.357014	1	0	0	1.41393	1.45632	PTGER3;PTGFRN;SOX9
MicroRNAs in cardiomyocyte hypertrophy WP1544	30803	0.363202	1	0	0	1.26243	1.27859	FZD1;CTF1;CISH;ROCK1;IKBKE
Viral Acute Myocarditis WP4298	30803	0.363202	1	0	0	1.26243	1.27859	SGCD;LAMA2;SGCB;DMD;TLR3
Intraflagellar transport proteins binding to dynein WP4532	43888	0.365976	1	0	0	1.57103	1.57918	DYNC1H1;IFT122
Photodynamic therapy-induced unfolded protein response WP3613	43888	0.365976	1	0	0	1.57103	1.57918	UBE2E1;ERP27
Sphingolipid pathway WP1422	43888	0.365976	1	0	0	1.57103	1.57918	ASAH1;SPHK1
Aryl Hydrocarbon Receptor Pathway WP2873	16862	0.370035	1	0	0	1.38319	1.37511	NCOA1;CYP1A1;POLK
AGE/RAGE pathway WP2324	24198	0.378414	1	0	0	1.28539	1.2491	LGALS3;ROCK1;INSR;EZR
Folate Metabolism WP176	24198	0.378414	1	0	0	1.28539	1.2491	INSR;SERPINE1;CAT;MTR
Energy Metabolism WP1541	17227	0.383006	1	0	0	1.35376	1.29921	NCOA1;PRKAA1;SIRT3
TLR4 Signaling and Tolerance WP3851	43889	0.383088	1	0	0	1.51492	1.45355	MAP3K7;IKBKE
Interleukin-1 Induced Activation of NF-kappa-B WP3656	43840	0.383125	1	0	0	2.12089	2.03477	SQSTM1
Leptin and adiponectin WP3934	43840	0.383125	1	0	0	2.12089	2.03477	PRKAA1
Trans-sulfuration pathway WP2333	43840	0.383125	1	0	0	2.12089	2.03477	MTR
Type III interferon signaling WP2113	43840	0.383125	1	0	0	2.12089	2.03477	IRF9
Vitamin D Metabolism WP1531	43840	0.383125	1	0	0	2.12089	2.03477	CYP2R1
Cannabinoid receptor signaling WP3869	43890	0.399998	1	0	0	1.46268	1.34025	PRKAR2B;CYP1A1
miRs in Muscle Cell Differentiation WP2012	43890	0.399998	1	0	0	1.46268	1.34025	PRKAR2B;PRKAR2A
Methionine metabolism leading to Sulphur Amino Acids and related disorders WP4292	43841	0.412225	1	0	0	1.92808	1.70864	MTR
NAD metabolism, sirtuins and aging WP3630	43841	0.412225	1	0	0	1.92808	1.70864	SIRT3
Serotonin Transporter Activity WP1455	43841	0.412225	1	0	0	1.92808	1.70864	SLC6A4
Extracellular vesicle-mediated signaling in recipient cells WP2870	10990	0.416686	1	0	0	1.41393	1.23778	APC;TGFBR2
Inflammatory Response Pathway WP453	10990	0.416686	1	0	0	1.41393	1.23778	COL1A2;LAMC1
Oligodendrocyte Specification and differentiation(including remyelination), leading to Myelin Components for CNS WP4304	10990	0.416686	1	0	0	1.41393	1.23778	CXCL1;SOX9
One Carbon Metabolism WP241	10990	0.416686	1	0	0	1.41393	1.23778	CHDH;MTR
Androgen receptor signaling pathway WP138	32994	0.419826	1	0	0	1.17827	1.02264	NCOA1;ROCK1;FHL2;UBE3A;NR2C2
Vitamin B12 Metabolism WP1533	18323	0.421505	1	0	0	1.27253	1.09937	INSR;SERPINE1;MTR
Ethanol effects on histone modifications WP3996	11355	0.433137	1	0	0	1.36832	1.14487	ADH1B;MTR
Toll-like Receptor Signaling WP3858	11355	0.433137	1	0	0	1.36832	1.14487	IKBKE;TLR3
Bone Morphogenic Protein (BMP) Signalling and Regulation WP1425	43842	0.439954	1	0	0	1.76741	1.45119	BMPR2
MAPK and NFkB Signalling Pathways Inhibited by Yersinia YopJ WP3849	43842	0.439954	1	0	0	1.76741	1.45119	RRAS
Primary Focal Segmental Glomerulosclerosis FSGS WP2572	26390	0.442717	1	0	0	1.17827	0.960087	NPHS1;ITGA3;SYNPO;CLDN1
Mammary gland development pathway - Pregnancy and lactation (Stage 3 of 4) WP2817	11720	0.449335	1	0	0	1.32556	1.06043	PNCK;NR3C1
Monoamine Transport WP727	11720	0.449335	1	0	0	1.32556	1.06043	SYN1;SLC6A4
Ovarian Infertility Genes WP34	11720	0.449335	1	0	0	1.32556	1.06043	EGR1;ATM
White fat cell differentiation WP4149	11720	0.449335	1	0	0	1.32556	1.06043	CEBPD;NR3C1
Chromosomal and microsatellite instability in colorectal cancer WP4216	26755	0.45326	1	0	0	1.16213	0.919582	APC;CSNK1A1;POLK;TGFBR2
Monoamine GPCRs WP58	12086	0.465267	1	0	0	1.28539	0.983506	ADRB2;DRD1
Oxidative Stress WP408	12086	0.465267	1	0	0	1.28539	0.983506	CAT;CYP1A1
Pregnane X Receptor pathway WP2876	12086	0.465267	1	0	0	1.28539	0.983506	NCOA1;SRPX2
Resistin as a regulator of inflammation WP4481	12086	0.465267	1	0	0	1.28539	0.983506	PLCB4;PLCD3
Development of pulmonary dendritic cells and macrophage subsets WP3892	43843	0.466376	1	0	0	1.63145	1.24441	IRF8
Disorders of Folate Metabolism and Transport WP4259	43843	0.466376	1	0	0	1.63145	1.24441	MTR
Estrogen Receptor Pathway WP2881	43843	0.466376	1	0	0	1.63145	1.24441	CYP1A1
Genes targeted by miRNAs in adipocytes WP1992	43843	0.466376	1	0	0	1.63145	1.24441	KCNQ1
Transcriptional cascade regulating adipogenesis WP4211	43843	0.466376	1	0	0	1.63145	1.24441	CEBPD
Vitamin B12 Disorders WP4271	43843	0.466376	1	0	0	1.63145	1.24441	MTR
ESC Pluripotency Pathways WP3931	6/116	0.467984	1	0	0	1.09701	0.832985	FZD1;BMPR2;APC;GAB1;FGF13;FGF12
Sudden Infant Death Syndrome (SIDS) Susceptibility Pathways WP706	8/158	0.469808	1	0	0	1.07387	0.811235	HADHB;EGR1;DEAF1;PRKAR2B;KCNQ1;PRKAR2A;NR3C1;SLC6A4
Interferon type I signaling pathways WP585	19784	0.471477	1	0	0	1.17827	0.885927	RAPGEF1;IRF9;IFNAR1
Ectoderm Differentiation WP2858	7/138	0.476706	1	0	0	1.07581	0.797022	GRAMD1B;CTNND2;ST8SIA4;FHL2;DMD;GLI3;SNCA
Circadian rhythm related genes WP3594	10/201	0.476983	1	0	0	1.05517	0.781116	EGR1;PRKAA1;KMT2A;SERPINE1;NR1D2;FBXL3;UBE3A;DRD1;BTBD9;SLC6A4
BDNF-TrkB Signaling WP3676	12451	0.480923	1	0	0	1.24758	0.91329	EEF2K;GAB1
IL-1 signaling pathway WP195	20149	0.483667	1	0	0	1.15685	0.840288	TAB3;MAP3K7;SQSTM1
RANKL/RANK (Receptor activator of NFKB (ligand)) Signaling Pathway WP2018	20149	0.483667	1	0	0	1.15685	0.840288	FHL2;MAP3K7;SQSTM1
B Cell Receptor Signaling Pathway WP23	35551	0.484645	1	0	0	1.09324	0.791877	PTPN18;MAX;GAB1;RAPGEF1;MAP3K7
Cysteine and methionine catabolism WP4504	43844	0.491552	1	0	0	1.51492	1.07588	MTR
Target Of Rapamycin (TOR) Signaling WP1471	13181	0.51137	1	0	0	1.17827	0.790223	PRKAA1;RRAGA
Chemokine signaling pathway WP3929	8/164	0.512094	1	0	0	1.03458	0.692391	ADCY9;CXCL12;PLCB4;ROCK1;CCL21;GNG7;CXCL14;ADCY5
Biogenic Amine Synthesis WP550	43845	0.515542	1	0	0	1.41393	0.936777	PNMT
Cholesterol Biosynthesis Pathway WP197	43845	0.515542	1	0	0	1.41393	0.936777	PMVK
GPR40 Pathway WP3958	43845	0.515542	1	0	0	1.41393	0.936777	PLCD3
miRNAs involved in DNA damage response WP1545	43845	0.515542	1	0	0	1.41393	0.936777	ATM
Complement and Coagulation Cascades WP558	21245	0.519394	1	0	0	1.09701	0.718644	F8;SERPINE1;CFI
Toll-like Receptor Signaling Pathway WP75	5/103	0.538088	1	0	0	1.02956	0.638052	TAB3;MAP3K7;IKBKE;TLR3;IFNAR1
Cori Cycle WP1946	43846	0.538402	1	0	0	1.32556	0.820719	SLC2A4
Deregulation of Rab and Rab Effector Genes in Bladder Cancer WP2291	43846	0.538402	1	0	0	1.32556	0.820719	SYTL2
Hedgehog Signaling Pathway WP47	43846	0.538402	1	0	0	1.32556	0.820719	GLI3
NAD+ metabolism WP3644	43846	0.538402	1	0	0	1.32556	0.820719	SIRT3
Osteoclast Signaling WP12	43846	0.538402	1	0	0	1.32556	0.820719	IFNAR1
SREBF and miR33 in cholesterol and lipid homeostasis WP2011	43846	0.538402	1	0	0	1.32556	0.820719	PRKAA1
Tryptophan catabolism leading to NAD+ production WP4210	43846	0.538402	1	0	0	1.32556	0.820719	AFMID
Amyotrophic lateral sclerosis (ALS) WP2447	13912	0.540617	1	0	0	1.11626	0.686548	CAT;MAP3K5
Parkinsons Disease Pathway WP2371	13912	0.540617	1	0	0	1.11626	0.686548	UBA7;SNCA
Sleep regulation WP3591	13912	0.540617	1	0	0	1.11626	0.686548	DRD1;BTBD9
RIG-I-like Receptor Signaling WP3865	21976	0.542452	1	0	0	1.06045	0.648628	CXCL12;MAP3K7;IKBKE
Oxidation by Cytochrome P450 WP43	22341	0.553737	1	0	0	1.04306	0.616517	CYP26B1;CYP2R1;CYP1A1
G13 Signaling Pathway WP524	14277	0.554779	1	0	0	1.08764	0.64082	ROCK1;CFL2
Calcium Regulation in the Cardiac Cell WP536	7/149	0.558301	1	0	0	0.996392	0.580753	CACNB1;ADCY9;PRKAR2B;PRKAR2A;GNG7;ADRB2;ADCY5
ACE Inhibitor Pathway WP554	43847	0.560183	1	0	0	1.24758	0.722963	AGTR1
Leptin Insulin Overlap WP3935	43847	0.560183	1	0	0	1.24758	0.722963	INSR
NOTCH1 regulation of human endothelial cell calcification WP3413	43847	0.560183	1	0	0	1.24758	0.722963	ITGA1
Proteasome Degradation WP183	22706	0.564856	1	0	0	1.02624	0.586172	UBA7;UBE2B;NEDD4
Glycogen Synthesis and Degradation WP500	14642	0.568627	1	0	0	1.06045	0.598653	PPP2R5C;PHKA2
Genotoxicity pathway WP4286	23071	0.575803	1	0	0	1.00995	0.557481	MEX3B;CEBPD;LRRFIP2
Estrogen metabolism WP697	43848	0.580938	1	0	0	1.17827	0.639932	CYP1A1
Inhibition of exosome biogenesis and secretion by Manumycin A in CRPC cells WP4301	43848	0.580938	1	0	0	1.17827	0.639932	RRAS
TCA Cycle (aka Krebs or citric acid cycle) WP78	43848	0.580938	1	0	0	1.17827	0.639932	IDH3G
Selenium Micronutrient Network WP15	31503	0.582526	1	0	0	0.986461	0.533065	INSR;SERPINE1;CAT;MTR
Hair Follicle Development: Cytodifferentiation (Part 3 of 3) WP2840	31868	0.591729	1	0	0	0.975122	0.511652	FZD1;CUX1;SOX9;NR3C1
TGF-beta Signaling Pathway WP366	6/132	0.594751	1	0	0	0.964041	0.500927	NUP214;COL1A2;ROCK1;PRKAR2A;MAP3K7;TGFBR2
Splicing factor NOVA regulated synaptic proteins WP4148	15373	0.595381	1	0	0	1.00995	0.523713	PLCB4;MAP4
Extracellular vesicles in the crosstalk of cardiac cells WP4300	43849	0.600715	1	0	0	1.11626	0.568884	HSPB1
Farnesoid X Receptor Pathway WP2879	43849	0.600715	1	0	0	1.11626	0.568884	ABCB4
TP53 Network WP1742	43849	0.600715	1	0	0	1.11626	0.568884	ATM
Vitamin A and Carotenoid Metabolism WP716	15738	0.608283	1	0	0	0.986461	0.490384	CYP26B1;RBP1
BMP Signaling Pathway in Eyelid Development WP3927	43850	0.619559	1	0	0	1.06045	0.507686	DKK2
Hedgehog Signaling Pathway WP4249	16103	0.62087	1	0	0	0.964041	0.459494	CSNK1A1;GLI3
Integrated Cancer Pathway WP1971	16103	0.62087	1	0	0	0.964041	0.459494	ATM;MAP3K5
Vitamin D Receptor Pathway WP2877	8/182	0.630649	1	0	0	0.93226	0.429777	CDX2;CYP1A1;TIMP2;TNFAIP3;IRF8;ADRB2;SLC2A4;S100A8
TNF alpha Signaling Pathway WP231	33695	0.635894	1	0	0	0.922126	0.417468	TNFAIP3;TAB3;MAP3K7;MAP3K5
Metapathway biotransformation Phase I and II WP702	8/183	0.636762	1	0	0	0.927165	0.418485	GSTM2;CYP26B1;NAA20;CYP2R1;CYP1A1;HNMT;NAT14;NAA80
Tamoxifen metabolism WP691	43851	0.637515	1	0	0	1.00995	0.454656	CYP1A1
PI3K-Akt Signaling Pathway WP4172	15/340	0.641527	1	0	0	0.935687	0.415355	PRKAA1;LAMA2;ITGA3;INSR;ITGA1;LAMC1;PPP2R5C;COL1A2;GNG7;PDGFC;ITGA11;THEM4;FGF13;FGF12;IFNAR1
Fatty Acid Biosynthesis WP357	43852	0.654624	1	0	0	0.964041	0.408459	ACACB
Globo Sphingolipid Metabolism WP1424	43852	0.654624	1	0	0	0.964041	0.408459	GALNT2
Vitamin D in inflammatory diseases WP4482	43852	0.654624	1	0	0	0.964041	0.408459	NR3C1
EBV LMP1 signaling WP262	43853	0.670926	1	0	0	0.922126	0.368017	MAP3K7
NRF2-ARE regulation WP4357	43853	0.670926	1	0	0	0.922126	0.368017	INSR
Brain-Derived Neurotrophic Factor (BDNF) signaling pathway WP2380	6/144	0.678344	1	0	0	0.883704	0.342967	EGR1;PRKAA1;APC;SQSTM1;ACACB;SYN1
Structural Pathway of Interleukin 1 (IL-1) WP2637	17930	0.679127	1	0	0	0.86567	0.334968	TAB3;MAP3K7
Angiogenesis WP1539	43854	0.68646	1	0	0	0.883704	0.332456	TIMP2
IL1 and megakaryocytes in obesity WP2865	43854	0.68646	1	0	0	0.883704	0.332456	TIMP2
Synaptic signaling pathways associated with autism spectrum disorder WP4539	18295	0.689861	1	0	0	0.848356	0.314965	PRKAA1;UBE3A
Synaptic Vesicle Pathway WP2267	18660	0.700298	1	0	0	0.831722	0.296301	SYN1;SLC6A4
Glycosylation and related congenital defects. WP4521	43855	0.701261	1	0	0	0.848356	0.301061	MGAT2
Physiological and Pathological Hypertrophy of the Heart WP1528	43855	0.701261	1	0	0	0.848356	0.301061	CTF1
Copper homeostasis WP3286	19025	0.710441	1	0	0	0.815727	0.278872	APC;XIAP
One carbon metabolism and related pathways WP3940	19025	0.710441	1	0	0	0.815727	0.278872	CHDH;MTR
Translation Factors WP107	19025	0.710441	1	0	0	0.815727	0.278872	EEF2K;EIF1AY
Cytokines and Inflammatory Response WP530	43856	0.715364	1	0	0	0.815727	0.273239	CXCL1
EPO Receptor Signaling WP581	43856	0.715364	1	0	0	0.815727	0.273239	CISH
Apoptosis-related network due to altered Notch3 in ovarian cancer WP2864	19391	0.720295	1	0	0	0.800336	0.262585	HSPB1;SQSTM1
Electron Transport Chain (OXPHOS system in mitochondria) WP111	4/103	0.721597	1	0	0	0.823647	0.268747	SLC25A27;NDUFA10;NDUFC1;COX5A
Canonical and Non-canonical Notch signaling WP3845	43857	0.728802	1	0	0	0.785515	0.2485	RRAS
TGF-beta Receptor Signaling WP560	19756	0.729865	1	0	0	0.785515	0.247355	SERPINE1;TGFBR2
Ebola Virus Pathway on Host WP4217	5/129	0.733226	1	0	0	0.822051	0.255083	ITGA3;NEDD4;ITGA1;IKBKE;TPCN2
DNA IR-damage and cellular response via ATR WP4016	29281	0.734111	1	0	0	0.795334	0.245834	HERC2;SMARCC2;ATM
Cardiac Hypertrophic Response WP2795	20121	0.739156	1	0	0	0.771233	0.233103	MAP3K7;IKBKE
DNA IR-Double Strand Breaks (DSBs) and cellular response via ATM WP3959	20121	0.739156	1	0	0	0.771233	0.233103	RNF8;ATM
Nanoparticle-mediated activation of receptor signaling WP2643	43858	0.741606	1	0	0	0.757461	0.226433	ITGA1
Nonalcoholic fatty liver disease WP4396	6/155	0.74444	1	0	0	0.82099	0.242293	PRKAA1;INSR;NDUFA10;NDUFC1;COX5A;MAP3K5
Myometrial Relaxation and Contraction Pathways WP289	6/156	0.749931	1	0	0	0.815727	0.234745	ADCY9;PRKAR2B;PRKAR2A;PDE4D;GNG7;ADCY5
MAPK Cascade WP422	43859	0.753806	1	0	0	0.731342	0.206692	RRAS
T-Cell Receptor and Co-stimulatory Signaling WP2583	43859	0.753806	1	0	0	0.731342	0.206692	CSNK1A1
Preimplantation Embryo WP3527	21217	0.765402	1	0	0	0.731342	0.195527	EGR1;CDX2
Dopaminergic Neurogenesis WP2855	43860	0.765431	1	0	0	0.706964	0.188983	NKX6-1
Matrix Metalloproteinases WP129	43860	0.765431	1	0	0	0.706964	0.188983	TIMP2
PI3K-AKT-mTOR signaling pathway and therapeutic opportunities WP3844	43860	0.765431	1	0	0	0.706964	0.188983	RB1CC1
MET in type 1 papillary renal cell carcinoma WP4205	21582	0.773626	1	0	0	0.718946	0.184529	GAB1;RAPGEF1
Factors and pathways affecting insulin-like growth factor (IGF1)-Akt signaling WP3850	43861	0.776508	1	0	0	0.684158	0.173057	MAP1LC3A
Gastric Cancer Network 2 WP2363	43861	0.776508	1	0	0	0.684158	0.173057	MTDH
Trans-sulfuration and one carbon metabolism WP2525	43861	0.776508	1	0	0	0.684158	0.173057	MTR
EGF/EGFR Signaling Pathway WP437	6/162	0.781084	1	0	0	0.785515	0.19408	ROCK1;IQSEC1;RPS6KA2;NEDD4;GAB1;STAM2
Oxidative phosphorylation WP623	21947	0.781598	1	0	0	0.706964	0.174206	NDUFA10;NDUFC1
Retinoblastoma Gene in Cancer WP2446	31837	0.784127	1	0	0	0.731342	0.17785	RBP1;RBBP7;SMARCA2
Constitutive Androstane Receptor Pathway WP2875	11689	0.787062	1	0	0	0.662778	0.158701	NCOA1
Development and heterogeneity of the ILC family WP3893	11689	0.787062	1	0	0	0.662778	0.158701	IL33
Initiation of transcription and translation elongation at the HIV-1 LTR WP3414	11689	0.787062	1	0	0	0.662778	0.158701	SUPT5H
T-Cell antigen Receptor (TCR) pathway during Staphylococcus aureus infection WP3863	22678	0.796804	1	0	0	0.684158	0.155404	RRAS;MAP3K7
Allograft Rejection WP2328	32568	0.796905	1	0	0	0.714907	0.162298	CXCL12;CCL21;AGTR1
Fluoropyrimidine Activity WP1601	12055	0.797118	1	0	0	0.642694	0.145733	ABCC5
Nuclear Receptors in Lipid Metabolism and Toxicity WP299	12055	0.797118	1	0	0	0.642694	0.145733	ABCB4
Prion disease pathway WP3995	12055	0.797118	1	0	0	0.642694	0.145733	BCL11A
Signal transduction through IL1R WP4496	12055	0.797118	1	0	0	0.642694	0.145733	MAP3K7
Ciliary landscape WP4352	8/216	0.803916	1	0	0	0.785515	0.171447	RAB21;DYNC1H1;APC;WNK1;IFT172;EXOC3;IFT122;MAPRE2
Endometrial cancer WP4155	23043	0.80405	1	0	0	0.673299	0.146842	APC;POLK
Amino Acid metabolism WP3925	33298	0.809045	1	0	0	0.699195	0.14816	PNMT;PPM1L;HNMT
Apoptosis Modulation and Signaling WP1772	33298	0.809045	1	0	0	0.699195	0.14816	XIAP;BIRC6;MAP3K5
Endochondral Ossification WP474	23408	0.811065	1	0	0	0.662778	0.13879	SOX9;GLI3
Oncostatin M Signaling Pathway WP2374	23774	0.817856	1	0	0	0.652582	0.131214	EGR1;SERPINE1
Association Between Physico-Chemical Features and Toxicity Associated Pathways WP3680	24139	0.824426	1	0	0	0.642694	0.124083	FZD1;APC
Human Thyroid Stimulating Hormone (TSH) signaling pathway WP2032	24139	0.824426	1	0	0	0.642694	0.124083	EGR1;PDE4D
Wnt Signaling in Kidney Disease WP4150	13150	0.824528	1	0	0	0.589136	0.113671	FZD1
Fibrin Complement Receptor 3 Signaling Pathway WP4136	13516	0.832816	1	0	0	0.573214	0.104865	TLR3
Melatonin metabolism and effects WP3298	13516	0.832816	1	0	0	0.573214	0.104865	CYP1A1
Photodynamic therapy-induced HIF-1 survival signaling WP3614	13516	0.832816	1	0	0	0.573214	0.104865	SERPINE1
The effect of progerin on the involved genes in Hutchinson-Gilford Progeria Syndrome WP4320	13516	0.832816	1	0	0	0.573214	0.104865	RBBP7
miRNAs involvement in the immune response in sepsis WP4329	13516	0.832816	1	0	0	0.573214	0.104865	MAP3K7
Striated Muscle Contraction Pathway WP383	13881	0.840713	1	0	0	0.558129	0.0968379	DMD
Human Complement System WP2806	35490	0.841837	1	0	0	0.655946	0.112934	CSNK1A1;CFI;LAMC1
Sterol Regulatory Element-Binding Proteins (SREBP) signalling WP1982	25235	0.842878	1	0	0	0.614751	0.105081	PRKAA1;SEC23A
ATM Signaling Pathway WP2516	14611	0.855407	1	0	0	0.530223	0.0828088	ATM
Ferroptosis WP4313	14611	0.855407	1	0	0	0.530223	0.0828088	MAP1LC3A
Neural Crest Differentiation WP2064	3/101	0.860889	1	0	0	0.629968	0.0943625	HDAC11;HEY2;SOX9
Nucleotide-binding Oligomerization Domain (NOD) pathway WP1433	14977	0.862239	1	0	0	0.51729	0.0766745	XIAP
Common Pathways Underlying Drug Addiction WP2636	15342	0.868747	1	0	0	0.504974	0.0710514	DRD1
DNA Replication WP466	15342	0.868747	1	0	0	0.504974	0.0710514	POLD4
IL-2 Signaling Pathway WP49	15342	0.868747	1	0	0	0.504974	0.0710514	CISH
TNF related weak inducer of apoptosis (TWEAK) Signaling Pathway WP2036	15342	0.868747	1	0	0	0.504974	0.0710514	MAP3K7
Genes related to primary cilium development (based on CRISPR) WP4536	3/103	0.869638	1	0	0	0.617735	0.0862842	IFT172;TMEM67;IFT122
Prolactin Signaling Pathway WP2037	27791	0.879267	1	0	0	0.558129	0.0718127	CISH;RPS6KA2
Glycolysis and Gluconeogenesis WP534	16438	0.886487	1	0	0	0.471309	0.0567872	SLC2A4
Aryl Hydrocarbon Receptor WP2586	16803	0.891852	1	0	0	0.461063	0.0527713	CYP1A1
Selenium Metabolism and Selenoproteins WP28	16803	0.891852	1	0	0	0.461063	0.0527713	EEFSEC
Mechanoregulation and pathology of YAP/TAZ via Hippo and non-Hippo mechanisms WP4534	17168	0.896962	1	0	0	0.451253	0.0490699	SGMS1
NO/cGMP/PKG mediated Neuroprotection WP4008	17168	0.896962	1	0	0	0.451253	0.0490699	XIAP
Thymic Stromal LymphoPoietin (TSLP) Signaling Pathway WP2203	17168	0.896962	1	0	0	0.451253	0.0490699	CISH
Rett syndrome causing genes WP4312	17533	0.901832	1	0	0	0.441852	0.0456553	SMARCA2
Signaling Pathways in Glioblastoma WP2261	29983	0.904088	1	0	0	0.51729	0.0521576	GAB1;ATM
Endoderm Differentiation WP2853	4/141	0.904249	1	0	0	0.601671	0.0605584	APC;PAF1;LAMC1;NR3C1
IL-3 Signaling Pathway WP286	17899	0.906472	1	0	0	0.432835	0.0425025	RAPGEF1
Alzheimers Disease WP2059	30348	0.90773	1	0	0	0.511058	0.0494745	PLCB4;SNCA
Photodynamic therapy-induced AP-1 survival signaling. WP3611	18264	0.910892	1	0	0	0.424178	0.0395888	MAP3K5
Pathways in clear cell renal cell carcinoma WP4018	31079	0.914629	1	0	0	0.499033	0.0445319	SQSTM1;ACACB
Pyrimidine metabolism WP4022	31079	0.914629	1	0	0	0.499033	0.0445319	POLD4;TK2
Cardiac Progenitor Differentiation WP2406	19360	0.922941	1	0	0	0.400168	0.0320897	IRX4
Pancreatic adenocarcinoma pathway WP4263	32540	0.926999	1	0	0	0.476605	0.036128	POLK;TGFBR2
T-Cell antigen Receptor (TCR) Signaling Pathway WP69	32905	0.929816	1	0	0	0.471309	0.0342965	CD83;MAP3K7
GPCRs, Other WP117	33270	0.93253	1	0	0	0.46613	0.0325611	ADRB2;CELSR1
Ras Signaling WP4223	5/184	0.938342	1	0	0	0.576329	0.0366781	PLA2G12A;RRAS;INSR;GNG7;GAB1
Epithelial to mesenchymal transition in colorectal cancer WP4239	4/159	0.945531	1	0	0	0.533557	0.0298837	FZD1;NR2C2;CLDN1;TGFBR2
Notch Signaling Pathway WP61	22282	0.947695	1	0	0	0.347687	0.0186785	HEY2
TYROBP Causal Network WP3945	22282	0.947695	1	0	0	0.347687	0.0186785	TMEM106A
G1 to S cell cycle control WP45	23377	0.954771	1	0	0	0.331389	0.0153379	ATM
Non-small cell lung cancer WP4255	24108	0.958949	1	0	0	0.321347	0.0134702	POLK
DNA Damage Response WP707	24838	0.962741	1	0	0	0.311896	0.0118431	ATM
RAC1/PAK1/p38/MMP2 Pathway WP3303	24838	0.962741	1	0	0	0.311896	0.0118431	TNIP1
Parkin-Ubiquitin Proteasomal System pathway WP2359	25569	0.966183	1	0	0	0.302984	0.0104234	SNCA
Non-genomic actions of 1,25 dihydroxyvitamin D3 WP4341	25934	0.967783	1	0	0	0.298717	0.00978234	PLCB4
miRNA Regulation of DNA Damage Response WP1530	25934	0.967783	1	0	0	0.298717	0.00978234	ATM
Peptide GPCRs WP24	27030	0.972143	1	0	0	0.286607	0.00809736	AGTR1
Apoptosis WP254	30682	0.982846	1	0	0	0.252487	0.00436867	XIAP
GPCRs, Class A Rhodopsin-like WP455	6/257	0.983568	1	0	0	0.49515	0.00820364	PTGER3;AGTR1;GPR85;ACKR2;ADRB2;DRD1
Cytoplasmic Ribosomal Proteins WP477	32509	0.98654	1	0	0	0.238302	0.00322925	RPS6KA2
ErbB Signaling Pathway WP673	33239	0.987785	1	0	0	0.233065	0.00286445	GAB1
Corticotropin-releasing hormone signaling pathway WP2355	33970	0.988914	1	0	0	0.228053	0.00254222	MAP3K5
Mesodermal Commitment Pathway WP2857	2/147	0.993303	1	0	0	0.288557	0.00193884	BMPR2;ARID5B
Cell Cycle WP179	1/120	0.99701	1	0	0	0.176741	0.00052918	ATM
mRNA Processing WP411	1/126	0.997766	1	0	0	0.168325	0.000376479	SUPT5H

## Sheet: cluster 7
Term	Overlap	P-value	Adjusted P-value	Old P-value	Old Adjusted P-value	Odds Ratio	Combined Score	Genes
EGF/EGFR Signaling Pathway WP437	13/162	0.000623923	0.294492	0	0	2.8814	21.2632	MAP2K2;JUND;TNK2;PIK3R2;AP2A1;EPN1;DNM1;PXDN;EIF4EBP1;NCK2;CSK;RIN1;BCAR1
PI3K-AKT-mTOR signaling pathway and therapeutic opportunities WP3844	43981	0.00131723	0.310865	0	0	5.98444	39.6902	RPTOR;BAD;EIF4EBP1;PIK3R2;ULK1
Primary Focal Segmental Glomerulosclerosis FSGS WP2572	26481	0.00386204	0.607627	0	0	3.49092	19.3975	LAMA5;INF2;NOTCH1;TGFB1;LRP5;AGRN;DNM1
IL-6 signaling pathway WP364	15827	0.00661734	0.780846	0	0	4.17519	20.9514	MAP2K2;BAD;PIK3R2;JUNB;NR2F6
Notch Signaling WP268	16558	0.00802704	0.757753	0	0	3.98963	19.2497	JAG2;NCOR2;NOTCH1;DVL1;RFNG
4-hydroxytamoxifen, Dexamethasone, and Retinoic Acids Regulation of p27 Expression WP3879	43908	0.0128369	1	0	0	5.98444	26.0648	MAP2K2;EIF4EBP1;MAP3K11
Epithelial to mesenchymal transition in colorectal cancer WP4239	10/159	0.0137609	0.927877	0	0	2.25828	9.67882	JAG2;CLDN5;MAP2K2;CLDN3;NOTCH1;TGFB1;ID1;LRP5;PIK3R2;PKD1
Target Of Rapamycin (TOR) Signaling WP1471	13241	0.0173218	1	0	0	3.98963	16.1811	RPTOR;AKT1S1;EIF4EBP1;ULK1
RIG-I-like Receptor Signaling WP3865	22037	0.0256089	1	0	0	2.99222	10.9659	OTUD5;NLRX1;TRADD;PIN1;ISG15
Nonalcoholic fatty liver disease WP4396	9/155	0.0297593	1	0	0	2.0849	7.32763	TGFB1;NDUFA11;NDUFS7;NDUFB11;NDUFS6;PIK3R2;UQCR11;COX5B;MAP3K11
Ethanol metabolism resulting in production of ROS by CYP2E1 WP4269	43871	0.0300437	1	0	0	7.18133	25.1713	MAP2K2;MAFK
IL-7 Signaling Pathway WP205	43915	0.0313567	1	0	0	4.3088	14.9185	MAP2K2;BAD;PIK3R2
TGF-beta Signaling Pathway WP366	8/132	0.031541	1	0	0	2.17616	7.52183	SKI;MAP2K2;TGFB1;JUND;PIK3R2;JUNB;PML;BCAR1
Pancreatic adenocarcinoma pathway WP4263	32660	0.0379362	1	0	0	2.42067	7.92008	MAP2K2;TGFB1;BAD;PIK3R2;PAK4;GADD45G
ErbB Signaling Pathway WP673	33390	0.0415791	1	0	0	2.36747	7.52893	MAP2K2;BAD;NCK2;EIF4EBP1;PIK3R2;PAK4
AMP-activated Protein Kinase (AMPK) Signaling WP1403	25324	0.0431315	1	0	0	2.60193	8.17917	RPTOR;STK11;EIF4EBP1;PIK3R2;SLC2A4RG
Corticotropin-releasing hormone signaling pathway WP2355	34121	0.0454353	1	0	0	2.31656	7.16156	TGFB1;JUND;GNA11;GNB2;JUNB;CACNA1H
Kennedy pathway from Sphingolipids WP3933	43874	0.0492974	1	0	0	5.5241	16.6269	PTDSS2;PEMT
Synaptic Vesicle Pathway WP2267	18719	0.0532331	1	0	0	2.81621	8.26015	AP2A1;AP2A2;DNM1;DNM2
One carbon metabolism and related pathways WP3940	19085	0.0564541	1	0	0	2.76205	7.93903	GPX4;SARDH;PEMT;DNM1
Integrin-mediated Cell Adhesion WP185	6/101	0.0630304	1	0	0	2.13307	5.8961	MAP2K2;CAPN10;PIK3R2;CSK;BCAR1;PAK4
Interferon type I signaling pathways WP585	19815	0.0632028	1	0	0	2.65975	7.34465	RPTOR;RPS6KA4;EIF4EBP1;PIK3R2
Alpha 6 Beta 4 signaling pathway WP244	12114	0.0632805	1	0	0	3.26424	9.00988	LAMA5;EIF4EBP1;PIK3R2
GPR40 Pathway WP3958	43876	0.0639947	1	0	0	4.78755	13.1608	GNA11;PKD1
Electron Transport Chain (OXPHOS system in mitochondria) WP111	6/103	0.0679766	1	0	0	2.09165	5.62359	ATP5IF1;NDUFS7;NDUFS6;UQCR11;COX5B;ATP5F1D
Vitamin D Receptor Pathway WP2877	9/182	0.0689577	1	0	0	1.7756	4.74843	CDKN2D;CDC34;TGFB1;ID1;SEMA3B;LRP5;MYO9B;JUNB;ABCD1
Angiopoietin Like Protein 8 Regulatory Pathway WP3915	7/132	0.07621	1	0	0	1.90414	4.90176	RPS6KA4;RPTOR;MAP2K2;EIF4EBP1;MAP3K10;PIK3R2;MAP3K11
Insulin Signaling WP481	8/160	0.0792994	1	0	0	1.79533	4.55031	RPS6KA4;PFKL;MAP2K2;EIF4EBP1;MAP3K10;PIK3R2;STX4;MAP3K11
Canonical and Non-Canonical TGF-B signaling WP3874	43878	0.0799461	1	0	0	4.22431	10.6723	TGFB1;LOXL2
IL-9 Signaling Pathway WP22	43878	0.0799461	1	0	0	4.22431	10.6723	MAP2K2;PIK3R2
NOTCH1 regulation of human endothelial cell calcification WP3413	43878	0.0799461	1	0	0	4.22431	10.6723	JAG2;NOTCH1
Kit receptor signaling pathway WP304	21641	0.0818234	1	0	0	2.43435	6.09364	MAP2K2;BAD;PIK3R2;JUNB
MET in type 1 papillary renal cell carcinoma WP4205	21641	0.0818234	1	0	0	2.43435	6.09364	MAP2K2;BAD;PIK3R2;PAK4
MicroRNAs in cardiomyocyte hypertrophy WP1544	30803	0.0851654	1	0	0	2.1373	5.26451	MAP2K2;TGFB1;DVL1;LRP5;PIK3R2
Oxidative phosphorylation WP623	22007	0.0858387	1	0	0	2.39378	5.8774	NDUFA11;NDUFS7;NDUFS6;ATP5F1D
Simplified Interaction Map Between LOXL4 and Oxidative Stress Pathway WP3670	43879	0.0883347	1	0	0	3.98963	9.68132	TGFB1;PKD1
TGF-B Signaling in Thyroid Cells for Epithelial-Mesenchymal Transition WP3859	43879	0.0883347	1	0	0	3.98963	9.68132	TGFB1;ID1
Pathways in clear cell renal cell carcinoma WP4018	31168	0.0885333	1	0	0	2.11216	5.12066	RPTOR;PFKL;TGFB1;AKT1S1;CAMK1
Notch Signaling Pathway WP61	22372	0.0899481	1	0	0	2.35453	5.67095	NCOR2;JAG2;NOTCH1;PIK3R2
G13 Signaling Pathway WP524	14305	0.0940255	1	0	0	2.76205	6.53001	TNK2;PIK3R2;PKN1
Endometrial cancer WP4155	23102	0.0984436	1	0	0	2.27979	5.28517	MAP2K2;BAD;PIK3R2;GADD45G
Bladder Cancer WP2828	14671	0.0996508	1	0	0	2.693	6.21028	MAP2K2;DAPK3;PIK3R2
Focal Adhesion WP306	9/198	0.102793	1	0	0	1.63212	3.71313	LAMA5;BAD;TNK2;COL6A2;PIK3R2;PIP5K1C;PPP1R12C;BCAR1;PAK4
Hypertrophy Model WP516	43881	0.105832	1	0	0	3.59066	8.06428	JUND;EIF4EBP1
T-Cell antigen Receptor (TCR) Signaling Pathway WP69	32994	0.106385	1	0	0	1.99481	4.46976	MAP2K2;DBNL;TGFB1;PIK3R2;NFATC1
Non-small cell lung cancer WP4255	24198	0.111855	1	0	0	2.17616	4.767	MAP2K2;BAD;PIK3R2;GADD45G
Glycerophospholipid Biosynthetic Pathway WP2533	43882	0.114901	1	0	0	3.41968	7.3991	PGS1;PEMT
Cell Cycle WP179	6/120	0.118712	1	0	0	1.79533	3.82595	CDKN2D;ZBTB17;FZR1;TGFB1;ANAPC2;GADD45G
Interleukin-11 Signaling Pathway WP2332	16132	0.123424	1	0	0	2.44818	5.12191	TGFB1;MAP2K2;PIK3R2
Fatty Acid Biosynthesis WP357	43883	0.12416	1	0	0	3.26424	6.80982	PC;ECHDC2
VEGFA-VEGFR2 Signaling Pathway WP3888	10/236	0.124614	1	0	0	1.52147	3.16851	MAP2K2;GIPC1;GPC1;AKT1S1;PIK3R2;NFATC1;CSK;SHB;EPN1;BCAR1
Regulation of Actin Cytoskeleton WP51	7/150	0.126257	1	0	0	1.67564	3.46764	MAP2K2;PIK3R2;CSK;PIP5K1C;SSH3;BCAR1;PAK4
Integrated Breast Cancer Pathway WP1984	7/151	0.129435	1	0	0	1.66455	3.40329	STK11;GRN;BAD;TRADD;NOXA1;PIK3R2;PML
miR-517 relationship with ARCN1 and USP1 WP3596	43835	0.131719	1	0	0	7.18133	14.5572	ID1
EBV LMP1 signaling WP262	43884	0.133589	1	0	0	3.12232	6.28518	TRADD;PDLIM7
Glutathione metabolism WP100	43884	0.133589	1	0	0	3.12232	6.28518	GPX4;OPLAH
Aryl Hydrocarbon Receptor Pathway WP2873	16862	0.13601	1	0	0	2.34174	4.67183	TGFB1;JUND;JUNB
Selenium Metabolism and Selenoproteins WP28	16862	0.13601	1	0	0	2.34174	4.67183	SELENOM;GPX4;SEPHS2
Breast cancer pathway WP4262	7/154	0.139206	1	0	0	1.63212	3.21821	JAG2;MAP2K2;NOTCH1;DVL1;LRP5;PIK3R2;GADD45G
Focal Adhesion-PI3K-Akt-mTOR-signaling pathway WP3932	12/303	0.141443	1	0	0	1.42205	2.78132	RPTOR;LAMA5;STK11;MAP2K2;BAD;GNB2;COL6A2;AKT1S1;EIF4EBP1;ULK1;PIK3R2;RAB11B
Thymic Stromal LymphoPoietin (TSLP) Signaling Pathway WP2203	17227	0.142462	1	0	0	2.29191	4.4662	MAP2K2;EIF4EBP1;RELB
Triacylglyceride Synthesis WP325	43885	0.143174	1	0	0	2.99222	5.81597	AGPAT2;PNPLA2
Neural Crest Differentiation WP2064	5/101	0.151195	1	0	0	1.77756	3.35813	NOTCH1;HDAC10;DVL1;ID1;RHOB
IL-3 Signaling Pathway WP286	17958	0.15566	1	0	0	2.19837	4.08914	TGFB1;BAD;PIK3R2
mir-124 predicted interactions with cell cycle and differentiation WP3595	43836	0.155907	1	0	0	5.98444	11.1221	STK11
Leptin signaling pathway WP2034	27851	0.161768	1	0	0	1.88982	3.44249	MAP2K2;BAD;EIF4EBP1;PIK3R2
Synaptic signaling pathways associated with autism spectrum disorder WP4539	18323	0.162397	1	0	0	2.1544	3.91608	RPTOR;EIF4EBP1;PIK3R2
Wnt/beta-catenin Signaling Pathway in Leukemia WP3658	43887	0.162744	1	0	0	2.76205	5.01472	LRP5;PML
Senescence and Autophagy in Cancer WP615	5/105	0.169181	1	0	0	1.70984	3.03802	TGFB1;AKT1S1;FKBP8;ULK1;BMI1
Canonical and Non-canonical Notch signaling WP3845	43888	0.1727	1	0	0	2.65975	4.67105	JAG2;NOTCH1
Acetylcholine Synthesis WP528	43837	0.179422	1	0	0	5.12952	8.8126	PEMT
Aflatoxin B1 metabolism WP699	43837	0.179422	1	0	0	5.12952	8.8126	AKR7A2
Cerebral Organic Acidurias, including diseases WP4519	43837	0.179422	1	0	0	5.12952	8.8126	D2HGDH
Hfe effect on hepcidin production WP3924	43837	0.179422	1	0	0	5.12952	8.8126	ID1
Pentose Phosphate Metabolism WP134	43837	0.179422	1	0	0	5.12952	8.8126	PGLS
Apoptosis-related network due to altered Notch3 in ovarian cancer WP2864	19419	0.183104	1	0	0	2.03245	3.45049	JUND;BCL3;PKN1
Regulation of toll-like receptor signaling pathway WP1449	6/139	0.192023	1	0	0	1.54993	2.5576	OTUD5;FBXW5;MAP2K2;PELI3;PIK3R2;RBCK1
Gastric Cancer Network 1 WP2361	43890	0.192886	1	0	0	2.47632	4.07517	NOTCH1;GATD3B
Lipid Metabolism Pathway WP3965	43890	0.192886	1	0	0	2.47632	4.07517	PRKAR1B;PNPLA2
MAPK Cascade WP422	43890	0.192886	1	0	0	2.47632	4.07517	MAP2K2;RASA3
RANKL/RANK (Receptor activator of NFKB (ligand)) Signaling Pathway WP2018	20149	0.197278	1	0	0	1.95854	3.17899	PIK3R2;NFATC1;RELB
Circadian rhythm related genes WP3594	8/201	0.199297	1	0	0	1.42912	2.30511	SLC9A3;JUND;MTA1;CAVIN3;GNA11;PML;NR2F6;RELB
NAD Biosynthesis II (from tryptophan) WP2485	43838	0.202283	1	0	0	4.48833	7.17275	QPRT
TFs Regulate miRNAs related to cardiac hypertrophy WP1559	43838	0.202283	1	0	0	4.48833	7.17275	TGFB1
GABA receptor Signaling WP4159	11355	0.213354	1	0	0	2.31656	3.57862	AP2A1;AP2A2
Brain-Derived Neurotrophic Factor (BDNF) signaling pathway WP2380	6/144	0.213699	1	0	0	1.49611	2.30878	MAP2K2;BAD;EIF4EBP1;NCK2;PIK3R2;CAMK1
Selenium Micronutrient Network WP15	31503	0.218153	1	0	0	1.67008	2.54279	SELENOM;PRDX5;GPX4;SEPHS2
Mammary gland development pathway - Pregnancy and lactation (Stage 3 of 4) WP2817	11720	0.223665	1	0	0	2.24417	3.36088	YY1;USF2
Degradation pathway of sphingolipids, including diseases WP4153	43839	0.224508	1	0	0	3.98963	5.95988	ARSA
miRNA regulation of prostate cancer signaling pathways WP3981	12086	0.234012	1	0	0	2.17616	3.16061	MAP2K2;BAD
Androgen receptor signaling pathway WP138	32964	0.24204	1	0	0	1.59585	2.26396	NCOR2;BAG1;PIK3R2;RHOB
Fatty Acid Beta Oxidation WP143	12451	0.244387	1	0	0	2.11216	2.97604	ECI1;PNPLA2
Gamma-Glutamyl Cycle for the biosynthesis and degradation of glutathione, including diseases WP4518	43840	0.246115	1	0	0	3.59066	5.03395	OPLAH
Trans-sulfuration pathway WP2333	43840	0.246115	1	0	0	3.59066	5.03395	MPST
Ras Signaling WP4223	7/184	0.253715	1	0	0	1.36601	1.87355	MAP2K2;RASA3;BAD;GNB2;PIK3R2;RIN1;PAK4
Genotoxicity pathway WP4286	23071	0.256174	1	0	0	1.70984	2.32863	NLRX1;SERTAD1;PHLDA3
Wnt Signaling in Kidney Disease WP4150	13181	0.265178	1	0	0	1.99481	2.64783	DVL1;LRP5
Gene regulatory network modelling somitogenesis WP2854	43841	0.267121	1	0	0	3.26424	4.30897	NOTCH1
PTF1A related regulatory pathway WP4147	43841	0.267121	1	0	0	3.26424	4.30897	NOTCH1
Oncostatin M Signaling Pathway WP2374	23802	0.271285	1	0	0	1.65723	2.162	MAP2K2;JUND;JUNB
Pathways Affected in Adenoid Cystic Carcinoma WP3651	23802	0.271285	1	0	0	1.65723	2.162	BRD1;MAP2K2;NOTCH1
Amyotrophic lateral sclerosis (ALS) WP2447	13912	0.285968	1	0	0	1.88982	2.36582	MAP2K2;BAD
Nuclear Receptors WP170	13912	0.285968	1	0	0	1.88982	2.36582	ESRRA;NR2F6
Histone Modifications WP2369	24532	0.286488	1	0	0	1.60776	2.00979	KMT5C;DOT1L;KMT2B
Alanine and aspartate metabolism WP106	43842	0.287543	1	0	0	2.99222	3.72945	PC
Iron metabolism in placenta WP2007	43842	0.287543	1	0	0	2.99222	3.72945	FTH1
Nanoparticle triggered regulated necrosis WP2513	43842	0.287543	1	0	0	2.99222	3.72945	TRADD
RAC1/PAK1/p38/MMP2 Pathway WP3303	24898	0.294116	1	0	0	1.58412	1.93861	BAD;TNIP2;EIF4EBP1
Adipogenesis WP236	5/130	0.296178	1	0	0	1.38102	1.68042	NCOR2;CNTFR;TGFB1;DVL1;AGPAT2
Ferroptosis WP4313	14642	0.306696	1	0	0	1.79533	2.1219	GPX4;FTH1
IL-5 Signaling Pathway WP127	14642	0.306696	1	0	0	1.79533	2.1219	MAP2K2;PIK3R2
Microglia Pathogen Phagocytosis Pathway WP3937	14642	0.306696	1	0	0	1.79533	2.1219	PIK3R2;CYBA
Oxidative Damage WP3941	14642	0.306696	1	0	0	1.79533	2.1219	BAD;TNK2
Chemokine signaling pathway WP3929	6/164	0.307221	1	0	0	1.31366	1.55036	GRK2;GNB2;PIK3R2;CSK;CCR10;BCAR1
EDA Signalling in Hair Follicle Development WP3930	43843	0.307397	1	0	0	2.76205	3.25816	RELB
Ganglio Sphingolipid Metabolism WP1423	43843	0.307397	1	0	0	2.76205	3.25816	ST3GAL2
Cysteine and methionine catabolism WP4504	43844	0.326698	1	0	0	2.56476	2.86924	MPST
Metabolic reprogramming in colon cancer WP4290	15373	0.327304	1	0	0	1.70984	1.90966	PFKL;SLC16A3
Splicing factor NOVA regulated synaptic proteins WP4148	15373	0.327304	1	0	0	1.70984	1.90966	NCDN;AGRN
Chromosomal and microsatellite instability in colorectal cancer WP4216	26724	0.332379	1	0	0	1.47562	1.62536	TGFB1;BAD;GADD45G
Ectoderm Differentiation WP2858	5/138	0.340005	1	0	0	1.30097	1.40347	HDAC10;ZNF219;NFATC1;MZF1;ZBTB7B
Mammary gland development pathway - Embryonic development (Stage 1 of 4) WP2813	43845	0.345463	1	0	0	2.39378	2.54427	TGFB1
Phytochemical activity on NRF2 transcriptional activation WP3	43845	0.345463	1	0	0	2.39378	2.54427	KEAP1
Regulation of sister chromatid separation at the metaphase-anaphase transition WP4240	43845	0.345463	1	0	0	2.39378	2.54427	ANAPC2
Role of Osx and miRNAs in tooth development WP3971	43845	0.345463	1	0	0	2.39378	2.54427	NOTCH1
Heart Development WP1591	16103	0.347745	1	0	0	1.63212	1.72399	NOTCH1;NFATC1
Integrated Cancer Pathway WP1971	16103	0.347745	1	0	0	1.63212	1.72399	BAD;NOXA1
Thermogenesis WP4321	4/108	0.354512	1	0	0	1.32988	1.3791	RPTOR;AKT1S1;ZNF516;PNPLA2
Prolactin Signaling Pathway WP2037	27820	0.355325	1	0	0	1.41737	1.46658	MAP2K2;EIF4EBP1;PIK3R2
Glycolysis and Gluconeogenesis WP534	16469	0.357888	1	0	0	1.59585	1.63979	PFKL;PC
Hedgehog Signaling Pathway WP47	43846	0.363705	1	0	0	2.24417	2.26977	GRK2
ID signaling pathway WP53	43846	0.363705	1	0	0	2.24417	2.26977	ID1
TCA Cycle and Deficiency of Pyruvate Dehydrogenase complex (PDHc) WP2453	43846	0.363705	1	0	0	2.24417	2.26977	PC
Tryptophan catabolism leading to NAD+ production WP4210	43846	0.363705	1	0	0	2.24417	2.26977	QPRT
DNA Damage Response (only ATM dependent) WP710	4/110	0.3672	1	0	0	1.3057	1.30811	TGFB1;BAD;DVL1;PIK3R2
NO/cGMP/PKG mediated Neuroprotection WP4008	17199	0.377996	1	0	0	1.52794	1.48649	BAD;TSPO
MAPK Signaling Pathway WP382	8/246	0.378618	1	0	0	1.1677	1.1341	RPS6KA4;JUND;MAP2K2;TGFB1;NFATC1;CACNA1H;MAP3K11;RELB
ACE Inhibitor Pathway WP554	43847	0.38144	1	0	0	2.11216	2.0357	TGFB1
Amplification and Expansion of Oncogenic Pathways as Metastatic Traits WP3678	43847	0.38144	1	0	0	2.11216	2.0357	NOTCH1
Mitochondrial LC-Fatty Acid Beta-Oxidation WP368	43847	0.38144	1	0	0	2.11216	2.0357	ECI1
Platelet-mediated interactions with vascular and circulating cells WP4462	43847	0.38144	1	0	0	2.11216	2.0357	TGFB1
miR-509-3p alteration of YAP1/ECM axis WP3967	43847	0.38144	1	0	0	2.11216	2.0357	BCAR1
Differentiation Pathway WP2848	17564	0.387952	1	0	0	1.49611	1.41663	NOTCH1;TGFB1
TCA Cycle (aka Krebs or citric acid cycle) WP78	43848	0.398682	1	0	0	1.99481	1.83441	IDH3B
Transcription co-factors SKI and SKIL protein partners WP4533	43848	0.398682	1	0	0	1.99481	1.83441	SKI
Calcium Regulation in the Cardiac Cell WP536	5/149	0.400863	1	0	0	1.20492	1.10146	PRKAR1B;GNB2;GNA11;CAMK1;RGS11
ESC Pluripotency Pathways WP3931	4/116	0.405132	1	0	0	1.23816	1.11873	MAP2K2;DVL1;LRP5;PIK3R2
Photodynamic therapy-induced AP-1 survival signaling. WP3611	18295	0.407647	1	0	0	1.43627	1.28884	BCL3;JUNB
Mitochondrial Gene Expression WP391	43849	0.415444	1	0	0	1.88982	1.66004	ESRRA
Serotonin Receptor 4/6/7 and NR3C Signaling WP734	43849	0.415444	1	0	0	1.88982	1.66004	MAP2K2
Translation Factors WP107	19025	0.427029	1	0	0	1.38102	1.17512	EIF4EBP1;EIF3F
Wnt Signaling Pathway WP363	19025	0.427029	1	0	0	1.38102	1.17512	DVL1;LRP5
BMP Signaling Pathway in Eyelid Development WP3927	43850	0.431739	1	0	0	1.79533	1.50796	NOTCH1
Hereditary leiomyomatosis and renal cell carcinoma pathway WP4206	43850	0.431739	1	0	0	1.79533	1.50796	KEAP1
Serotonin Receptor 2 and ELK-SRF/GATA4 signaling WP732	43850	0.431739	1	0	0	1.79533	1.50796	MAP2K2
Cardiac Progenitor Differentiation WP2406	19391	0.436595	1	0	0	1.35497	1.12293	NOTCH1;TGFB1
Hair Follicle Development: Cytodifferentiation (Part 3 of 3) WP2840	31837	0.438052	1	0	0	1.23816	1.022	NOTCH1;TGFB1;NFATC1
IL-4 Signaling Pathway WP395	19756	0.446073	1	0	0	1.32988	1.07357	BAD;PIK3R2
TGF-beta Receptor Signaling WP560	19756	0.446073	1	0	0	1.32988	1.07357	SKI;TGFB1
Cardiac Hypertrophic Response WP2795	20121	0.455461	1	0	0	1.3057	1.02686	MAP2K2;TGFB1
Hematopoietic Stem Cell Differentiation WP2849	20121	0.455461	1	0	0	1.3057	1.02686	NOTCH1;ZNF835
IL-1 signaling pathway WP195	20121	0.455461	1	0	0	1.3057	1.02686	MAP2K2;PIK3R2
Globo Sphingolipid Metabolism WP1424	43852	0.462982	1	0	0	1.63212	1.25684	ST3GAL2
Methionine De Novo and Salvage Pathway WP3580	43852	0.462982	1	0	0	1.63212	1.25684	MRI1
NAD+ biosynthetic pathways WP3645	43852	0.462982	1	0	0	1.63212	1.25684	QPRT
Vitamin D in inflammatory diseases WP4482	43852	0.462982	1	0	0	1.63212	1.25684	NFATC1
miRNA targets in ECM and membrane receptors WP2911	43852	0.462982	1	0	0	1.63212	1.25684	COL6A2
Mitochondrial complex I assembly model OXPHOS system WP4324	20486	0.464758	1	0	0	1.28238	0.98261	NDUFS6;NDUFB11
TNF alpha Signaling Pathway WP231	33664	0.474364	1	0	0	1.17087	0.87321	BAD;TRADD;CYBA
PI3K-Akt Signaling Pathway WP4172	10/340	0.475498	1	0	0	1.05608	0.785081	RPTOR;LAMA5;STK11;MAP2K2;BAD;GNB2;COL6A2;EIF4EBP1;PIK3R2;PKN1
NRF2-ARE regulation WP4357	43853	0.477954	1	0	0	1.56116	1.15251	KEAP1
Nanoparticle triggered autophagic cell death WP2509	43853	0.477954	1	0	0	1.56116	1.15251	ULK1
G Protein Signaling Pathways WP35	34029	0.481499	1	0	0	1.15828	0.84653	PRKAR1B;GNA11;GNB2
GPCRs, Class B Secretin-like WP334	43854	0.49251	1	0	0	1.49611	1.05961	ADGRL1
Photodynamic therapy-induced NFE2L2 (NRF2) survival signaling WP3612	43854	0.49251	1	0	0	1.49611	1.05961	KEAP1
Glycosylation and related congenital defects. WP4521	43855	0.506661	1	0	0	1.43627	0.976537	ALG2
MTHFR deficiency WP4288	43855	0.506661	1	0	0	1.43627	0.976537	PEMT
B Cell Receptor Signaling Pathway WP23	35490	0.509563	1	0	0	1.11051	0.748711	MAP2K2;PIK3R2;PIP5K1C
Cytokines and Inflammatory Response WP530	43856	0.520417	1	0	0	1.38102	0.901981	TGFB1
EPO Receptor Signaling WP581	43856	0.520417	1	0	0	1.38102	0.901981	MAP2K2
Follicle Stimulating Hormone (FSH) signaling pathway WP2035	43857	0.533791	1	0	0	1.32988	0.834831	EIF4EBP1
Endochondral Ossification WP474	23408	0.535587	1	0	0	1.12208	0.700619	TGFB1;SERPINH1
Nanoparticle-mediated activation of receptor signaling WP2643	43858	0.546792	1	0	0	1.28238	0.774155	MAP2K2
Association Between Physico-Chemical Features and Toxicity Associated Pathways WP3680	24139	0.552262	1	0	0	1.08808	0.646028	DVL1;CAMK1
Cannabinoid receptor signaling WP3869	43859	0.559432	1	0	0	1.23816	0.719165	PRKAR1B
Selective expression of chemokine receptors during T-cell polarization WP4494	43859	0.559432	1	0	0	1.23816	0.719165	TGFB1
miRs in Muscle Cell Differentiation WP2012	43859	0.559432	1	0	0	1.23816	0.719165	PRKAR1B
DNA Damage Response WP707	24869	0.56851	1	0	0	1.05608	0.596405	PML;GADD45G
Dopaminergic Neurogenesis WP2855	43860	0.571719	1	0	0	1.19689	0.669188	TGFB1
Extracellular vesicle-mediated signaling in recipient cells WP2870	43860	0.571719	1	0	0	1.19689	0.669188	TGFB1
Inflammatory Response Pathway WP453	43860	0.571719	1	0	0	1.19689	0.669188	LAMA5
Sterol Regulatory Element-Binding Proteins (SREBP) signalling WP1982	25235	0.576473	1	0	0	1.04077	0.573285	YY1;SCAP
Metapathway biotransformation Phase I and II WP702	5/183	0.579804	1	0	0	0.981056	0.534739	AKR7A2;GPX4;CHST12;CHST13;NAT8L
Ethanol effects on histone modifications WP3996	43861	0.583665	1	0	0	1.15828	0.62365	HDAC10
Gastric Cancer Network 2 WP2363	43861	0.583665	1	0	0	1.15828	0.62365	OTUD5
Toll-like Receptor Signaling WP3858	43861	0.583665	1	0	0	1.15828	0.62365	RELB
Tumor suppressor activity of SMARCB1 WP4204	43861	0.583665	1	0	0	1.15828	0.62365	GLI4
Non-genomic actions of 1,25 dihydroxyvitamin D3 WP4341	25965	0.592075	1	0	0	1.01145	0.530126	ISG15;RELB
miRNA Regulation of DNA Damage Response WP1530	25965	0.592075	1	0	0	1.01145	0.530126	PML;GADD45G
Initiation of transcription and translation elongation at the HIV-1 LTR WP3414	11689	0.595278	1	0	0	1.12208	0.582054	NFATC1
Oxidative Stress WP408	12055	0.606567	1	0	0	1.08808	0.543974	JUNB
Signal transduction through IL1R WP4496	12055	0.606567	1	0	0	1.08808	0.543974	TGFB1
BDNF-TrkB Signaling WP3676	12420	0.617543	1	0	0	1.05608	0.509037	EIF4EBP1
Signaling of Hepatocyte Growth Factor Receptor WP313	12420	0.617543	1	0	0	1.05608	0.509037	MAP2K2
Type 2 papillary renal cell carcinoma WP4241	12420	0.617543	1	0	0	1.05608	0.509037	TGFB1
p38 MAPK Signaling Pathway WP400	12420	0.617543	1	0	0	1.05608	0.509037	TRADD
Wnt Signaling WP428	3/115	0.624927	1	0	0	0.936695	0.440359	DVL1;LRP5;NFATC1
Photodynamic therapy-induced NF-kB survival signaling WP3617	12785	0.628212	1	0	0	1.0259	0.47692	RELB
Myometrial Relaxation and Contraction Pathways WP289	4/156	0.635107	1	0	0	0.920683	0.417955	PRKAR1B;IGFBP4;GNB2;RGS11
Photodynamic therapy-induced HIF-1 survival signaling WP3614	13516	0.648668	1	0	0	0.97045	0.420044	PFKL
The effect of progerin on the involved genes in Hutchinson-Gilford Progeria Syndrome WP4320	13516	0.648668	1	0	0	0.97045	0.420044	MTA1
Type II interferon signaling (IFNG) WP619	13516	0.648668	1	0	0	0.97045	0.420044	ISG15
miRNAs involvement in the immune response in sepsis WP4329	13516	0.648668	1	0	0	0.97045	0.420044	RELB
Hippo-Merlin Signaling Dysregulation WP4541	3/120	0.653472	1	0	0	0.897666	0.381918	PPP1R14A;PRKAR1B;PAK4
Signaling Pathways in Glioblastoma WP2261	29983	0.670191	1	0	0	0.875772	0.350477	MAP2K2;PIK3R2
Apoptosis WP254	30713	0.683019	1	0	0	0.85492	0.325924	BAD;TRADD
mRNA Processing WP411	3/126	0.685628	1	0	0	0.85492	0.322664	PRPF6;PABPN1;SNRNP70
Pyrimidine metabolism WP4022	31079	0.689278	1	0	0	0.844862	0.314382	NME3;UCKL1
Common Pathways Underlying Drug Addiction WP2636	15342	0.695026	1	0	0	0.85492	0.311025	MAP2K2
IL-2 Signaling Pathway WP49	15342	0.695026	1	0	0	0.85492	0.311025	MAP2K2
TNF related weak inducer of apoptosis (TWEAK) Signaling Pathway WP2036	15342	0.695026	1	0	0	0.85492	0.311025	RELB
ncRNAs involved in Wnt signaling in hepatocellular carcinoma WP4336	31444	0.695435	1	0	0	0.835038	0.303301	DVL1;LRP5
Ebola Virus Pathway on Host WP4217	3/129	0.70085	1	0	0	0.835038	0.296824	PIK3R2;RHOB;RELB
Hedgehog Signaling Pathway WP4249	16072	0.711812	1	0	0	0.81606	0.277413	GRK2
ATM Signaling Network in Development and Disease WP3878	16438	0.719855	1	0	0	0.797925	0.262282	STK11
Ciliary landscape WP4352	5/216	0.722265	1	0	0	0.831172	0.270433	RABEP2;ANKS3;ERF;COPS7A;AGPAT2
Amino Acid metabolism WP3925	33270	0.724721	1	0	0	0.789157	0.254084	MPST;PC
Apoptosis Modulation and Signaling WP1772	33270	0.724721	1	0	0	0.789157	0.254084	BAD;TRADD
Aryl Hydrocarbon Receptor WP2586	16803	0.727675	1	0	0	0.780579	0.248147	NCOR2
Regulation of Microtubule Cytoskeleton WP2038	16803	0.727675	1	0	0	0.780579	0.248147	DVL1
Energy Metabolism WP1541	17168	0.735277	1	0	0	0.763971	0.234928	ESRRA
Mechanoregulation and pathology of YAP/TAZ via Hippo and non-Hippo mechanisms WP4534	17168	0.735277	1	0	0	0.763971	0.234928	PAK4
LncRNA involvement in canonical Wnt signaling and colorectal cancer WP4258	34366	0.741125	1	0	0	0.763971	0.228875	DVL1;LRP5
Exercise-induced Circadian Regulation WP410	17533	0.742667	1	0	0	0.748055	0.222552	CLDN5
Rett syndrome causing genes WP4312	17533	0.742667	1	0	0	0.748055	0.222552	NCOR2
Hepatitis C and Hepatocellular Carcinoma WP3646	17899	0.74985	1	0	0	0.732789	0.210956	TGFB1
Structural Pathway of Interleukin 1 (IL-1) WP2637	17899	0.74985	1	0	0	0.732789	0.210956	MAP2K2
Endoderm Differentiation WP2853	3/141	0.756133	1	0	0	0.763971	0.213559	ZBTB17;NOTCH1;TGFB1
Pathways Regulating Hippo Signaling WP4540	35827	0.761692	1	0	0	0.732789	0.199475	PRKAR1B;GNA11
NRF2 pathway WP2884	3/146	0.77661	1	0	0	0.737808	0.186531	TGFB1;FTH1;KEAP1
Wnt Signaling Pathway and Pluripotency WP399	2/102	0.780828	1	0	0	0.704052	0.174183	DVL1;LRP5
Toll-like Receptor Signaling Pathway WP75	2/103	0.785397	1	0	0	0.697216	0.168424	MAP2K2;PIK3R2
DNA IR-Double Strand Breaks (DSBs) and cellular response via ATM WP3959	20090	0.788939	1	0	0	0.652848	0.154768	HSF1
Pathogenic Escherichia coli infection WP2272	20090	0.788939	1	0	0	0.652848	0.154768	NCK2
Preimplantation Embryo WP3527	21186	0.806134	1	0	0	0.61908	0.133415	ESRRA
Sudden Infant Death Syndrome (SIDS) Susceptibility Pathways WP706	3/158	0.820022	1	0	0	0.681772	0.13528	SLC9A3;PRKAR1B;MAZ
TYROBP Causal Network WP3945	22282	0.821929	1	0	0	0.588633	0.115431	TCIRG1
Proteasome Degradation WP183	22647	0.826904	1	0	0	0.579139	0.110075	PSMD9
T-Cell antigen Receptor (TCR) pathway during Staphylococcus aureus infection WP3863	22647	0.826904	1	0	0	0.579139	0.110075	MAP2K2
Lung fibrosis WP3624	23012	0.831739	1	0	0	0.569947	0.105005	TGFB1
G1 to S cell cycle control WP45	23377	0.83644	1	0	0	0.561041	0.100202	CDKN2D
Spinal Cord Injury WP2431	2/118	0.844488	1	0	0	0.608587	0.102866	TGFB1;RHOB
Folate Metabolism WP176	24108	0.845452	1	0	0	0.54404	0.0913354	GPX4
Human Thyroid Stimulating Hormone (TSH) signaling pathway WP2032	24108	0.845452	1	0	0	0.54404	0.0913354	PIK3R2
Parkin-Ubiquitin Proteasomal System pathway WP2359	25569	0.862016	1	0	0	0.512952	0.0761637	PSMD9
Arrhythmogenic Right Ventricular Cardiomyopathy WP2118	27030	0.876808	1	0	0	0.485225	0.0637913	EMD
Peptide GPCRs WP24	27030	0.876808	1	0	0	0.485225	0.0637913	CCR10
DNA IR-damage and cellular response via ATR WP4016	29221	0.89608	1	0	0	0.448833	0.0492482	PML
Alzheimers Disease WP2059	30317	0.904557	1	0	0	0.43261	0.0433953	BAD
Viral Acute Myocarditis WP4298	30682	0.907226	1	0	0	0.42746	0.0416192	TGFB1
Allograft Rejection WP2328	32509	0.919494	1	0	0	0.403445	0.0338618	TGFB1
Cytoplasmic Ribosomal Proteins WP477	32509	0.919494	1	0	0	0.403445	0.0338618	RPL13
GPCRs, Other WP117	33239	0.923935	1	0	0	0.394578	0.0312163	LTB4R2
Human Complement System WP2806	35431	0.935845	1	0	0	0.370172	0.0245445	LAMA5
Nuclear Receptors Meta-Pathway WP2882	5/319	0.944815	1	0	0	0.5628	0.0319481	JUND;TGFB1;FTH1;KEAP1;JUNB
Mesodermal Commitment Pathway WP2857	1/147	0.984507	1	0	0	0.244263	0.00381406	AMH
GPCRs, Class A Rhodopsin-like WP455	1/257	0.999326	1	0	0	0.139715	9.42036e-05	CCR10

## Sheet: cluster 8
Term	Overlap	P-value	Adjusted P-value	Old P-value	Old Adjusted P-value	Odds Ratio	Combined Score	Genes
SREBF and miR33 in cholesterol and lipid homeostasis WP2011	43937	0.00122893	0.580055	0	0	8.07754	54.1326	SREBF1;FASN;SIRT6;MED15
Structural Pathway of Interleukin 1 (IL-1) WP2637	18050	0.00387225	0.913852	0	0	3.95635	21.9732	TOLLIP;MKNK2;SAFB;MAP2K7;ELK1;NFKBIB
Pyrimidine metabolism WP4022	31260	0.00478493	0.752828	0	0	3.04096	16.2457	NT5C;POLR2J3;DUT;POLD1;POLD2;POLR3E;POLR2E;NME4
TNF alpha Signaling Pathway WP231	33817	0.00767723	0.905913	0	0	2.80958	13.6812	MAP4K2;CDC37;FADD;MAP2K7;NFKBIE;PRKCZ;TNFRSF1A;NFKBIB
Rett syndrome causing genes WP4312	17654	0.01599	1	0	0	3.36564	13.9196	XAB2;GPS2;CRK;SHANK3;SMARCA4
Sterol Regulatory Element-Binding Proteins (SREBP) signalling WP1982	25355	0.0198229	1	0	0	2.80958	11.0161	SREBF1;NR1H2;FASN;MVD;MED15;LSS
Target Of Rapamycin (TOR) Signaling WP1471	13241	0.0244507	1	0	0	3.59002	13.3229	PRR5;DDIT4;MLST8;PRR5L
Pathogenic Escherichia coli infection WP2272	20210	0.0272799	1	0	0	2.93729	10.579	TUBB6;YWHAQ;ARPC1B;ARPC5L;TUBB4B
Insulin Signaling WP481	10/160	0.0273903	1	0	0	2.01939	7.26487	ARHGAP33;EHD2;MAP4K2;MAPK7;RPS6KB2;MAP2K7;ELK1;PRKCZ;CRK;SH2B2
Liver X Receptor Pathway WP2874	43871	0.0365013	1	0	0	6.46204	21.392	SREBF1;FASN
Oxidative phosphorylation WP623	22037	0.0378329	1	0	0	2.69251	8.81684	NDUFS8;NDUFB7;NDUFAB1;NDUFS3;NDUFA4L2
Genes related to primary cilium development (based on CRISPR) WP4536	7/103	0.0408174	1	0	0	2.19584	7.02371	TEDC1;TEDC2;FBF1;INPP5E;KATNB1;FUZ;WDR34
Apoptosis WP254	30834	0.0458938	1	0	0	2.30787	7.11153	TNFRSF25;FADD;NFKBIE;BBC3;TNFRSF1A;NFKBIB
Nanoparticle triggered regulated necrosis WP2513	43873	0.0514039	1	0	0	5.38503	15.983	FADD;TNFRSF1A
Nonalcoholic fatty liver disease WP4396	9/155	0.0520813	1	0	0	1.87607	5.5437	COX8A;SREBF1;NDUFS8;NDUFB7;NDUFAB1;NDUFS3;NDUFA4L2;BBC3;TNFRSF1A
Angiopoietin Like Protein 8 Regulatory Pathway WP3915	8/132	0.052889	1	0	0	1.95819	5.75622	SREBF1;MAP4K2;MAPK7;FASN;RPS6KB2;MLST8;MAP2K7;CRK
MAPK Cascade WP422	43919	0.0594461	1	0	0	3.34243	9.43463	MAP2K7;ELK1;SIPA1
Homologous recombination WP186	43874	0.0595335	1	0	0	4.9708	14.0237	POLD1;POLD2
Apoptosis Modulation and Signaling WP1772	33390	0.0630842	1	0	0	2.13034	5.88674	PIDD1;TOLLIP;TNFRSF25;FADD;BBC3;TNFRSF1A
ERK Pathway in Huntington's Disease WP3853	43875	0.0680687	1	0	0	4.61574	12.4036	MAP2K7;ELK1
Gastric Cancer Network 2 WP2363	43921	0.0699322	1	0	0	3.12679	8.31798	COL9A3;CHTF18;LMNB2
Initiation of transcription and translation elongation at the HIV-1 LTR WP3414	11749	0.0754662	1	0	0	3.02908	7.82735	HDAC4;NELFB;NELFA
Cholesterol Biosynthesis Pathway WP197	43876	0.0769767	1	0	0	4.30802	11.0469	MVD;LSS
ID signaling pathway WP53	43877	0.0862262	1	0	0	4.03877	9.89814	SREBF1;ELK1
Interactome of polycomb repressive complex 2 (PRC2) WP2916	43877	0.0862262	1	0	0	4.03877	9.89814	ELL;TRIM35
Cardiac Hypertrophic Response WP2795	20180	0.0901702	1	0	0	2.34983	5.65382	HDAC4;MAPK7;MAP2K7;TNFRSF1A
IL-1 signaling pathway WP195	20180	0.0901702	1	0	0	2.34983	5.65382	TOLLIP;MAP2K7;PRKCZ;NFKBIB
Mitochondrial complex I assembly model OXPHOS system WP4324	20546	0.0948588	1	0	0	2.30787	5.43588	NDUFB7;NDUFAB1;NDUFS3;TMEM70
Apoptosis Modulation by HSP70 WP384	43880	0.115736	1	0	0	3.40107	7.33421	FADD;TNFRSF1A
Mitochondrial Gene Expression WP391	43880	0.115736	1	0	0	3.40107	7.33421	POLRMT;HCFC1
Nucleotide Metabolism WP404	43880	0.115736	1	0	0	3.40107	7.33421	POLD1;POLG
DNA Replication WP466	15401	0.140107	1	0	0	2.30787	4.53577	CDT1;POLD1;POLD2
Eukaryotic Transcription Initiation WP405	15766	0.147366	1	0	0	2.2542	4.31642	ERCC2;POLR3E;POLR2E
Association Between Physico-Chemical Features and Toxicity Associated Pathways WP3680	24198	0.147551	1	0	0	1.95819	3.74717	GPX1;AXIN1;FZD9;ELK1
Hippo-Yap signaling pathway WP4537	43884	0.158234	1	0	0	2.80958	5.17998	MAP4K2;YWHAQ
AMP-activated Protein Kinase (AMPK) Signaling WP1403	25294	0.165183	1	0	0	1.87305	3.37281	SREBF1;PFKFB3;FASN;RPS6KB2
Parkin-Ubiquitin Proteasomal System pathway WP2359	25659	0.171222	1	0	0	1.8463	3.25834	TUBB6;PSMD6;UBE2J2;TUBB4B
Mechanoregulation and pathology of YAP/TAZ via Hippo and non-Hippo mechanisms WP4534	17227	0.177528	1	0	0	2.06235	3.56504	MAP4K2;YWHAQ;LIMD1
Signal Transduction of S1P Receptor WP26	43886	0.180428	1	0	0	2.58481	4.4263	MAPK7;SPHK2
mRNA Processing WP411	6/126	0.196183	1	0	0	1.53858	2.5059	HNRNPM;SF3A2;SFSWAP;RNPS1;CLASRP;SUGP1
VEGFA-VEGFR2 Signaling Pathway WP3888	10/236	0.197554	1	0	0	1.36908	2.22029	HDAC4;HGS;MLST8;PRKD2;FADD;MAP2K7;ELK1;PRKCZ;F3;CRK
Arachidonate Epoxygenase / Epoxide Hydrolase WP678	43837	0.197567	1	0	0	4.61574	7.48525	COX8A
Mevalonate pathway WP3963	43837	0.197567	1	0	0	4.61574	7.48525	MVD
Photodynamic therapy-induced AP-1 survival signaling. WP3611	18323	0.201158	1	0	0	1.93861	3.10888	MAP2K7;ELK1;TNFRSF1A
Electron Transport Chain (OXPHOS system in mitochondria) WP111	5/103	0.214535	1	0	0	1.56846	2.4143	COX8A;NDUFS8;NDUFB7;NDUFAB1;NDUFS3
Cytosine methylation WP3585	43839	0.246487	1	0	0	3.59002	5.02763	MBD3
DNA Mismatch Repair WP531	43839	0.246487	1	0	0	3.59002	5.02763	POLD1
Macrophage markers WP4146	43839	0.246487	1	0	0	3.59002	5.02763	F3
Metabolism of Spingolipids in ER and Golgi apparatus WP4142	43839	0.246487	1	0	0	3.59002	5.02763	SPHK2
Pyrimidine metabolism and related diseases WP4225	43839	0.246487	1	0	0	3.59002	5.02763	NT5C
Thiamine metabolic pathways WP4297	43839	0.246487	1	0	0	3.59002	5.02763	BCKDK
Ethanol effects on histone modifications WP3996	11355	0.249039	1	0	0	2.08453	2.8978	HDAC4;SLC19A1
White fat cell differentiation WP4149	11720	0.26061	1	0	0	2.01939	2.71553	SREBF1;TLE3
Regulation of toll-like receptor signaling pathway WP1449	6/139	0.261395	1	0	0	1.39468	1.87128	SIGIRR;RNF31;TOLLIP;MLST8;FADD;MAP2K7
Interleukin-1 Induced Activation of NF-kappa-B WP3656	43840	0.269818	1	0	0	3.23102	4.23265	PRKCZ
Signaling of Hepatocyte Growth Factor Receptor WP313	12451	0.283754	1	0	0	1.9006	2.39408	ELK1;CRK
Methionine metabolism leading to Sulphur Amino Acids and related disorders WP4292	43841	0.292429	1	0	0	2.93729	3.6115	GNMT
SRF and miRs in Smooth Muscle Differentiation and Proliferation WP1991	43841	0.292429	1	0	0	2.93729	3.6115	ELK1
The alternative pathway of fetal androgen synthesis WP4524	43841	0.292429	1	0	0	2.93729	3.6115	POR
Cytoplasmic Ribosomal Proteins WP477	32599	0.296946	1	0	0	1.45214	1.7632	RPS15;RPS6KB2;RPS2;RPL8
Proteasome Degradation WP183	22706	0.300965	1	0	0	1.5634	1.87726	PSMD6;HLA-A;PSMA7
Endometrial cancer WP4155	23071	0.309478	1	0	0	1.53858	1.80455	AXIN1;CTNNA2;ELK1
ErbB Signaling Pathway WP673	33329	0.310945	1	0	0	1.42023	1.65902	RPS6KB2;MAP2K7;ELK1;CRK
Bone Morphogenic Protein (BMP) Signalling and Regulation WP1425	43842	0.31434	1	0	0	2.69251	3.11599	TOB2
Iron metabolism in placenta WP2007	43842	0.31434	1	0	0	2.69251	3.11599	MCOLN1
The effect of progerin on the involved genes in Hutchinson-Gilford Progeria Syndrome WP4320	13547	0.318314	1	0	0	1.7465	1.99924	MBD3;SREBF1
Amyotrophic lateral sclerosis (ALS) WP2447	13912	0.329754	1	0	0	1.70054	1.88659	GPX1;TNFRSF1A
BMP2-WNT4-FOXO1 Pathway in Human Primary Endometrial Stromal Cell Differentiation WP3876	43843	0.335574	1	0	0	2.4854	2.71384	LEFTY2
Cell Differentiation - Index WP2029	43843	0.335574	1	0	0	2.4854	2.71384	LEFTY2
Genes targeted by miRNAs in adipocytes WP1992	43843	0.335574	1	0	0	2.4854	2.71384	HDAC4
Transcriptional cascade regulating adipogenesis WP4211	43843	0.335574	1	0	0	2.4854	2.71384	SREBF1
Vitamin B12 Disorders WP4271	43843	0.335574	1	0	0	2.4854	2.71384	CD320
IL-5 Signaling Pathway WP127	14642	0.352465	1	0	0	1.61551	1.68466	RPS6KB2;ELK1
Fas Ligand (FasL) pathway and Stress induction of Heat Shock Proteins (HSP) regulation WP314	15373	0.374902	1	0	0	1.53858	1.50949	FADD;LMNB2
Metabolic reprogramming in colon cancer WP4290	15373	0.374902	1	0	0	1.53858	1.50949	PGAM1;FASN
TNF related weak inducer of apoptosis (TWEAK) Signaling Pathway WP2036	15373	0.374902	1	0	0	1.53858	1.50949	FADD;NFKBIB
Classical pathway of steroidogenesis, including diseases WP4523	43845	0.376092	1	0	0	2.15401	2.10645	POR
Oxysterols derived from cholesterol WP4545	43845	0.376092	1	0	0	2.15401	2.10645	NR1H2
Regulation of sister chromatid separation at the metaphase-anaphase transition WP4240	43845	0.376092	1	0	0	2.15401	2.10645	MAD1L1
Role of Osx and miRNAs in tooth development WP3971	43845	0.376092	1	0	0	2.15401	2.10645	NOTCH3
Non-genomic actions of 1,25 dihydroxyvitamin D3 WP4341	25993	0.377501	1	0	0	1.36522	1.32997	MAPK7;PRKCZ;TNFRSF1A
Integrin-mediated Cell Adhesion WP185	4/101	0.381443	1	0	0	1.27961	1.23328	VASP;MAPK7;CAPN1;CRK
EGF/EGFR Signaling Pathway WP437	6/162	0.386488	1	0	0	1.19667	1.13762	MAPK7;HGS;ARHGEF1;ELK1;PRKCZ;CRK
Cori Cycle WP1946	43846	0.395417	1	0	0	2.01939	1.87362	PGAM1
Deregulation of Rab and Rab Effector Genes in Bladder Cancer WP2291	43846	0.395417	1	0	0	2.01939	1.87362	SYTL1
Hedgehog Signaling Pathway WP47	43846	0.395417	1	0	0	2.01939	1.87362	KIF7
NAD+ metabolism WP3644	43846	0.395417	1	0	0	2.01939	1.87362	SIRT6
Hedgehog Signaling Pathway WP4249	16103	0.397013	1	0	0	1.46864	1.35671	KIF7;CSNK1G2
ATM Signaling Network in Development and Disease WP3878	16469	0.407933	1	0	0	1.43601	1.2876	HDAC4;PPP5C
Notch Signaling WP268	16469	0.407933	1	0	0	1.43601	1.2876	NOTCH3;NUMBL
Regulation of Wnt/B-catenin Signaling by Small Molecule Compounds WP3664	43847	0.414144	1	0	0	1.9006	1.67546	AXIN1
Selenium Metabolism and Selenoproteins WP28	16834	0.418756	1	0	0	1.40479	1.22282	SELENOO;GPX1
Prolactin Signaling Pathway WP2037	27820	0.419367	1	0	0	1.2754	1.10834	ELK1;CTSD;NFKBIB
Ectoderm Differentiation WP2858	5/138	0.424949	1	0	0	1.17066	1.00183	RHPN1;RRBP1;TCF3;CTNNA2;GAS2L1
Thermogenesis WP4321	4/108	0.430418	1	0	0	1.19667	1.00879	RPS6KB2;MLST8;SIRT6;SMARCA4
4-hydroxytamoxifen, Dexamethasone, and Retinoic Acids Regulation of p27 Expression WP3879	43848	0.432291	1	0	0	1.79501	1.5054	MKNK2
Inhibition of exosome biogenesis and secretion by Manumycin A in CRPC cells WP4301	43848	0.432291	1	0	0	1.79501	1.5054	HGS
Simplified Interaction Map Between LOXL4 and Oxidative Stress Pathway WP3670	43848	0.432291	1	0	0	1.79501	1.5054	CDC37
Cell Differentiation - Index expanded WP2023	43849	0.449878	1	0	0	1.70054	1.35835	LEFTY2
Serotonin Receptor 4/6/7 and NR3C Signaling WP734	43849	0.449878	1	0	0	1.70054	1.35835	ELK1
TP53 Network WP1742	43849	0.449878	1	0	0	1.70054	1.35835	BBC3
Synaptic signaling pathways associated with autism spectrum disorder WP4539	18295	0.460993	1	0	0	1.29241	1.00081	GRIN3B;SHANK3
Hematopoietic Stem Cell Gene Regulation by GABP alpha/beta Complex WP3657	43850	0.46692	1	0	0	1.61551	1.23037	SMARCA4
Nanomaterial induced apoptosis WP2507	43850	0.46692	1	0	0	1.61551	1.23037	FADD
Serotonin Receptor 2 and ELK-SRF/GATA4 signaling WP732	43850	0.46692	1	0	0	1.61551	1.23037	ELK1
Alzheimers Disease WP2059	30376	0.476268	1	0	0	1.16784	0.866272	CAPN1;FADD;TNFRSF1A
One carbon metabolism and related pathways WP3940	19025	0.481429	1	0	0	1.2427	0.908409	GPX1;GNMT
Translation Factors WP107	19025	0.481429	1	0	0	1.2427	0.908409	CLUH;EIF3G
Wnt Signaling Pathway WP363	19025	0.481429	1	0	0	1.2427	0.908409	AXIN1;TCF3
Neovascularisation processes WP4331	43851	0.483435	1	0	0	1.53858	1.1183	NOTCH3
MicroRNAs in cardiomyocyte hypertrophy WP1544	30742	0.484191	1	0	0	1.15393	0.836922	HDAC4;MAPK7;MAP2K7
ESC Pluripotency Pathways WP3931	4/116	0.485024	1	0	0	1.11414	0.806147	MAPK7;FZD9;AXIN1;ELK1
Pathways in clear cell renal cell carcinoma WP4018	31107	0.492056	1	0	0	1.14036	0.808701	KDM5C;FASN;MLST8
MAPK Signaling Pathway WP382	8/246	0.493881	1	0	0	1.05074	0.741255	MAP4K2;PPP5C;MAPK7;MKNK2;MAP2K7;ELK1;CRK;TNFRSF1A
Fatty Acid Biosynthesis WP357	43852	0.49944	1	0	0	1.46864	1.01963	FASN
Methionine De Novo and Salvage Pathway WP3580	43852	0.49944	1	0	0	1.46864	1.01963	ADI1
NAD+ biosynthetic pathways WP3645	43852	0.49944	1	0	0	1.46864	1.01963	SIRT6
Type II diabetes mellitus WP1584	43852	0.49944	1	0	0	1.46864	1.01963	PRKCZ
miRNA targets in ECM and membrane receptors WP2911	43852	0.49944	1	0	0	1.46864	1.01963	COL6A1
Interferon type I signaling pathways WP585	19756	0.501381	1	0	0	1.19667	0.826171	MLST8;CRK
Ciliary landscape WP4352	7/216	0.504639	1	0	0	1.04709	0.716117	NUDC;EXOSC4;MAEA;ARHGDIA;FUZ;WDR34;LSM4
Blood Clotting Cascade WP272	43853	0.514949	1	0	0	1.40479	0.932341	F3
Estrogen signaling pathway WP712	43853	0.514949	1	0	0	1.40479	0.932341	ELK1
Glutathione metabolism WP100	43853	0.514949	1	0	0	1.40479	0.932341	GPX1
miRNA regulation of p53 pathway in prostate cancer WP3982	43854	0.529979	1	0	0	1.34626	0.854764	BBC3
Preimplantation Embryo WP3527	21217	0.539767	1	0	0	1.11414	0.687001	KHSRP;SMARCA4
Glycosylation and related congenital defects. WP4521	43855	0.544543	1	0	0	1.29241	0.785535	ALG12
MTHFR deficiency WP4288	43855	0.544543	1	0	0	1.29241	0.785535	EHMT1
Kit receptor signaling pathway WP304	21582	0.549039	1	0	0	1.09526	0.656702	CRK;SH2B2
RIG-I-like Receptor Signaling WP3865	21947	0.558179	1	0	0	1.07701	0.627976	FADD;NFKBIB
EPO Receptor Signaling WP581	43856	0.558657	1	0	0	1.2427	0.723523	PTPRU
Wnt/beta-catenin Signaling Pathway in Leukemia WP3658	43856	0.558657	1	0	0	1.2427	0.723523	TCF3
LncRNA involvement in canonical Wnt signaling and colorectal cancer WP4258	34394	0.55997	1	0	0	1.03118	0.59795	AXIN1;FZD9;TCF3
Notch Signaling Pathway WP61	22313	0.567186	1	0	0	1.05935	0.600723	NOTCH3;NUMBL
Canonical and Non-canonical Notch signaling WP3845	43857	0.572335	1	0	0	1.19667	0.667781	NOTCH3
Eicosanoid Synthesis WP167	43857	0.572335	1	0	0	1.19667	0.667781	PTGES2
Follicle Stimulating Hormone (FSH) signaling pathway WP2035	43857	0.572335	1	0	0	1.19667	0.667781	RPS6KB2
Intraflagellar transport proteins binding to dynein WP4532	43857	0.572335	1	0	0	1.19667	0.667781	WDR34
Photodynamic therapy-induced unfolded protein response WP3613	43857	0.572335	1	0	0	1.19667	0.667781	BBC3
Sphingolipid pathway WP1422	43857	0.572335	1	0	0	1.19667	0.667781	SPHK2
Lung fibrosis WP3624	23043	0.584801	1	0	0	1.02572	0.550282	RTEL1;DPP9
Focal Adhesion-PI3K-Akt-mTOR-signaling pathway WP3932	9/303	0.597024	1	0	0	0.959708	0.495016	RAB10;SREBF1;PFKFB3;LAMC3;CDC37;DDIT4;RPS6KB2;MLST8;EFNA4
Lipid Metabolism Pathway WP3965	43859	0.598433	1	0	0	1.11414	0.572048	FASN
PDGFR-beta pathway WP3972	43859	0.598433	1	0	0	1.11414	0.572048	ELK1
miRs in Muscle Cell Differentiation WP2012	43859	0.598433	1	0	0	1.11414	0.572048	PRKCZ
Neural Crest Differentiation WP2064	3/101	0.608829	1	0	0	0.959708	0.476224	HDAC4;NOTCH3;AXIN1
Folate Metabolism WP176	24139	0.610218	1	0	0	0.979096	0.483613	GPX1;SLC19A1
Extracellular vesicle-mediated signaling in recipient cells WP2870	43860	0.610879	1	0	0	1.07701	0.530809	AXIN1
Inflammatory Response Pathway WP453	43860	0.610879	1	0	0	1.07701	0.530809	TNFRSF1A
Wnt Signaling Pathway and Pluripotency WP399	3/102	0.615506	1	0	0	0.950299	0.46119	FZD9;AXIN1;PRKCZ
Histone Modifications WP2369	24504	0.618423	1	0	0	0.964483	0.463513	SETD1A;EHMT1
Toll-like Receptor Signaling Pathway WP75	3/103	0.622106	1	0	0	0.941073	0.446675	TOLLIP;FADD;MAP2K7
Factors and pathways affecting insulin-like growth factor (IGF1)-Akt signaling WP3850	43861	0.622941	1	0	0	1.04226	0.493308	TNFRSF1A
IL17 signaling pathway WP2112	43861	0.622941	1	0	0	1.04226	0.493308	NFKBIB
Toll-like Receptor Signaling WP3858	43861	0.622941	1	0	0	1.04226	0.493308	TOLLIP
Tumor suppressor activity of SMARCB1 WP4204	43861	0.622941	1	0	0	1.04226	0.493308	SMARCA4
DNA Damage Response WP707	24869	0.626494	1	0	0	0.950299	0.444375	PIDD1;BBC3
Senescence and Autophagy in Cancer WP615	3/105	0.635072	1	0	0	0.923148	0.419124	MLST8;ING1;SLC39A3
Fluoropyrimidine Activity WP1601	12055	0.645955	1	0	0	0.979096	0.42789	ERCC2
Monoamine GPCRs WP58	12055	0.645955	1	0	0	0.979096	0.42789	ADRA2C
Oxidative Stress WP408	12055	0.645955	1	0	0	0.979096	0.42789	GPX1
Prion disease pathway WP3995	12055	0.645955	1	0	0	0.979096	0.42789	ELK1
Signal transduction through IL1R WP4496	12055	0.645955	1	0	0	0.979096	0.42789	TOLLIP
miRNA Regulation of DNA Damage Response WP1530	25965	0.649912	1	0	0	0.910146	0.392199	PIDD1;BBC3
Brain-Derived Neurotrophic Factor (BDNF) signaling pathway WP2380	4/144	0.655178	1	0	0	0.897505	0.379509	MAPK7;RHOG;ELK1;SH2B2
p38 MAPK Signaling Pathway WP400	12420	0.656931	1	0	0	0.950299	0.399294	ELK1
Chromosomal and microsatellite instability in colorectal cancer WP4216	26696	0.664866	1	0	0	0.88521	0.361317	AXIN1;BBC3
Photodynamic therapy-induced NF-kB survival signaling WP3617	12785	0.667567	1	0	0	0.923148	0.373059	TNFRSF1A
Wnt Signaling in Kidney Disease WP4150	13150	0.677874	1	0	0	0.897505	0.348945	FZD9
Zinc homeostasis WP3529	13150	0.677874	1	0	0	0.897505	0.348945	SLC39A3
Calcium Regulation in the Cardiac Cell WP536	4/149	0.68126	1	0	0	0.867387	0.332914	GJC2;RGS19;YWHAQ;PRKCZ
Nuclear Receptors WP170	13881	0.69754	1	0	0	0.850268	0.306263	NR1H2
Parkinsons Disease Pathway WP2371	13881	0.69754	1	0	0	0.850268	0.306263	UBE2J2
Breast cancer pathway WP4262	4/154	0.70593	1	0	0	0.839225	0.292251	NOTCH3;RPS6KB2;FZD9;AXIN1
G13 Signaling Pathway WP524	14246	0.706919	1	0	0	0.828466	0.287345	ARHGEF1
PDGF Pathway WP2526	14246	0.706919	1	0	0	0.828466	0.287345	ELK1
Myometrial Relaxation and Contraction Pathways WP289	4/156	0.715403	1	0	0	0.828466	0.277462	RGS19;YWHAQ;ADM;PRKCZ
ATM Signaling Pathway WP2516	14611	0.716007	1	0	0	0.807754	0.269842	PIDD1
Ferroptosis WP4313	14611	0.716007	1	0	0	0.807754	0.269842	PCBP1
Microglia Pathogen Phagocytosis Pathway WP3937	14611	0.716007	1	0	0	0.807754	0.269842	ARPC1B
Oxidative Damage WP3941	14611	0.716007	1	0	0	0.807754	0.269842	NFKBIE
Cell Cycle WP179	3/120	0.722312	1	0	0	0.807754	0.262761	YWHAQ;PKMYT1;MAD1L1
Signaling Pathways in Glioblastoma WP2261	29983	0.725855	1	0	0	0.788053	0.252496	MAP2K7;PRKCZ
IL-2 Signaling Pathway WP49	15342	0.733349	1	0	0	0.76929	0.238583	RPS6KB2
Splicing factor NOVA regulated synaptic proteins WP4148	15342	0.733349	1	0	0	0.76929	0.238583	PRKCZ
Integrated Cancer Pathway WP1971	16072	0.749633	1	0	0	0.734322	0.211611	BBC3
Selenium Micronutrient Network WP15	31444	0.749803	1	0	0	0.751399	0.216362	SELENOO;GPX1
ncRNAs involved in Wnt signaling in hepatocellular carcinoma WP4336	31444	0.749803	1	0	0	0.751399	0.216362	AXIN1;FZD9
Glycolysis and Gluconeogenesis WP534	16438	0.757399	1	0	0	0.718004	0.199508	PGAM1
Aryl Hydrocarbon Receptor Pathway WP2873	16803	0.764924	1	0	0	0.702395	0.188227	CDC37
Aryl Hydrocarbon Receptor WP2586	16803	0.764924	1	0	0	0.702395	0.188227	CDC37
Ebola Virus Pathway on Host WP4217	3/129	0.766336	1	0	0	0.751399	0.199973	VPS18;CLTA;HLA-A
Allograft Rejection WP2328	32540	0.766563	1	0	0	0.726071	0.193017	HLA-A;PRKCZ
Pancreatic adenocarcinoma pathway WP4263	32540	0.766563	1	0	0	0.726071	0.193017	RIPK4;RPS6KB2
NO/cGMP/PKG mediated Neuroprotection WP4008	17168	0.772217	1	0	0	0.687451	0.177699	PDE2A
IL-3 Signaling Pathway WP286	17899	0.786131	1	0	0	0.659391	0.158671	YWHAQ
G Protein Signaling Pathways WP35	34001	0.787387	1	0	0	0.694843	0.166092	ARHGEF1;PRKCZ
Synaptic Vesicle Pathway WP2267	18629	0.799196	1	0	0	0.633533	0.142006	CLTA
Copper homeostasis WP3286	18994	0.805427	1	0	0	0.62135	0.134449	SCO2
B Cell Receptor Signaling Pathway WP23	35462	0.806558	1	0	0	0.666189	0.143217	ELK1;CRK
Apoptosis-related network due to altered Notch3 in ovarian cancer WP2864	19360	0.811465	1	0	0	0.609626	0.12736	AXIN1
Cardiac Progenitor Differentiation WP2406	19360	0.811465	1	0	0	0.609626	0.12736	MESP1
Phosphodiesterases in neuronal function WP4222	19360	0.811465	1	0	0	0.609626	0.12736	PDE2A
IL-4 Signaling Pathway WP395	19725	0.817315	1	0	0	0.598337	0.120703	ELK1
TGF-beta Receptor Signaling WP560	19725	0.817315	1	0	0	0.598337	0.120703	LEFTY2
DNA IR-Double Strand Breaks (DSBs) and cellular response via ATM WP3959	20090	0.822985	1	0	0	0.587458	0.114447	UPF1
RANKL/RANK (Receptor activator of NFKB (ligand)) Signaling Pathway WP2018	20090	0.822985	1	0	0	0.587458	0.114447	MAP2K7
PI3K-Akt Signaling Pathway WP4172	8/340	0.829744	1	0	0	0.760239	0.14189	LAMC3;CDC37;DDIT4;COL6A1;RPS6KB2;MLST8;COL9A3;EFNA4
Complement and Coagulation Cascades WP558	21186	0.83896	1	0	0	0.557072	0.0978174	F3
MET in type 1 papillary renal cell carcinoma WP4205	21551	0.843959	1	0	0	0.54763	0.0929063	CRK
Regulation of Actin Cytoskeleton WP51	3/150	0.84713	1	0	0	0.646204	0.107206	ARHGEF1;BAIAP2;CRK
Oxidation by Cytochrome P450 WP43	22282	0.853496	1	0	0	0.529675	0.0839081	POR
Prader-Willi and Angelman Syndrome WP3998	22282	0.853496	1	0	0	0.529675	0.0839081	PRKCZ
TYROBP Causal Network WP3945	22282	0.853496	1	0	0	0.529675	0.0839081	GPX1
T-Cell antigen Receptor (TCR) pathway during Staphylococcus aureus infection WP3863	22647	0.858044	1	0	0	0.521132	0.0797851	MAP2K7
DNA Damage Response (only ATM dependent) WP710	2/110	0.858646	1	0	0	0.587458	0.0895277	AXIN1;BBC3
Focal Adhesion WP306	4/198	0.865232	1	0	0	0.652731	0.0944874	VASP;LAMC3;ELK1;CRK
Endochondral Ossification WP474	23377	0.866722	1	0	0	0.504847	0.0722118	HDAC4
Sudden Infant Death Syndrome (SIDS) Susceptibility Pathways WP706	3/158	0.870848	1	0	0	0.613484	0.0848376	YWHAQ;TCF3;CC2D1A
Epithelial to mesenchymal transition in colorectal cancer WP4239	3/159	0.873572	1	0	0	0.609626	0.0824	NOTCH3;CLDN23;FZD9
AGE/RAGE pathway WP2324	24108	0.87487	1	0	0	0.489548	0.0654429	PRKCZ
Wnt Signaling WP428	2/115	0.875015	1	0	0	0.561916	0.0750238	FZD9;AXIN1
RAC1/PAK1/p38/MMP2 Pathway WP3303	24838	0.88252	1	0	0	0.47515	0.059381	CRK
Spinal Cord Injury WP2431	2/118	0.88398	1	0	0	0.54763	0.0675343	RTN4R;SLIT1
Chemokine signaling pathway WP3929	3/164	0.886444	1	0	0	0.59104	0.0712427	PRKCZ;CRK;NFKBIB
Primary Focal Segmental Glomerulosclerosis FSGS WP2572	26299	0.896449	1	0	0	0.448752	0.0490549	YWHAQ
Arrhythmogenic Right Ventricular Cardiomyopathy WP2118	27030	0.902782	1	0	0	0.436624	0.0446553	CTNNA2
Peptide GPCRs WP24	27030	0.902782	1	0	0	0.436624	0.0446553	MC1R
Leptin signaling pathway WP2034	27760	0.908728	1	0	0	0.425134	0.0406891	ELK1
TGF-beta Signaling Pathway WP366	2/132	0.918456	1	0	0	0.489548	0.0416418	HGS;AXIN1
DNA IR-damage and cellular response via ATR WP4016	29221	0.919554	1	0	0	0.403877	0.0338719	UPF1
Hair Follicle Development: Cytodifferentiation (Part 3 of 3) WP2840	31778	0.935505	1	0	0	0.371381	0.0247596	TCF3
Retinoblastoma Gene in Cancer WP2446	31778	0.935505	1	0	0	0.371381	0.0247596	CDT1
Androgen receptor signaling pathway WP138	32874	0.941334	1	0	0	0.359002	0.0217041	PIAS4
T-Cell antigen Receptor (TCR) Signaling Pathway WP69	32874	0.941334	1	0	0	0.359002	0.0217041	CRK
NRF2 pathway WP2884	2/146	0.943126	1	0	0	0.442605	0.0259171	SLC39A3;SLC2A8
GPCRs, Other WP117	33239	0.943158	1	0	0	0.355057	0.0207783	P2RY11
Mesodermal Commitment Pathway WP2857	2/147	0.944585	1	0	0	0.439594	0.025061	AXIN1;LEFTY2
Corticotropin-releasing hormone signaling pathway WP2355	33970	0.946638	1	0	0	0.347421	0.0190521	ELK1
Integrated Breast Cancer Pathway WP1984	2/151	0.950075	1	0	0	0.427949	0.0219173	FADD;SMARCA4
Human Complement System WP2806	35431	0.952972	1	0	0	0.333095	0.0160451	ADM
Pathways Regulating Hippo Signaling WP4540	35796	0.954435	1	0	0	0.329696	0.0153758	PRKCZ
Nuclear Receptors Meta-Pathway WP2882	5/319	0.971012	1	0	0	0.506429	0.0148971	SREBF1;CDC37;FASN;SLC39A3;SLC2A8
Vitamin D Receptor Pathway WP2877	2/182	0.978104	1	0	0	0.355057	0.00786072	CRACR2B;CLPTM1L
Adipogenesis WP236	1/130	0.983434	1	0	0	0.24854	0.00415181	SREBF1
GPCRs, Class A Rhodopsin-like WP455	3/257	0.987155	1	0	0	0.377162	0.00487613	MC1R;P2RY11;ADRA2C
Metapathway biotransformation Phase I and II WP702	1/183	0.996909	1	0	0	0.176558	0.000546582	GAL3ST3
Ras Signaling WP4223	1/184	0.997005	1	0	0	0.175599	0.000526622	ELK1
Circadian rhythm related genes WP3594	1/201	0.998253	1	0	0	0.160747	0.000281026	SREBF1

## Sheet: cluster 9
Term	Overlap	P-value	Adjusted P-value	Old P-value	Old Adjusted P-value	Odds Ratio	Combined Score	Genes
Intraflagellar transport proteins binding to dynein WP4532	43948	0.000989585	0.467084	0	0	8.87115	61.3726	DYNC1I2;IFT22;IFT80;DYNLL2
Genes related to primary cilium development (based on CRISPR) WP4536	6/103	0.00765362	1	0	0	3.48817	16.9964	TTC30B;BBS12;TUBD1;IFT80;EFCAB7;LZTFL1
Ciliary landscape WP4352	9/216	0.0106713	1	0	0	2.49501	11.3278	YAP1;DYNC1I2;IFT22;RMND5A;TTC30B;IFT80;DYNLL2;AAR2;LZTFL1
TLR4 Signaling and Tolerance WP3851	43889	0.0790977	1	0	0	4.27716	10.8515	IRAK4;TIRAP
PDGFR-beta pathway WP3972	43890	0.0840508	1	0	0	4.12967	10.2264	STAT6;PIK3R1
PI3K-AKT-mTOR signaling pathway and therapeutic opportunities WP3844	10990	0.0890955	1	0	0	3.99202	9.65288	PIK3R1;ATG13
Matrix Metalloproteinases WP129	10990	0.0890955	1	0	0	3.99202	9.65288	MMP16;MMP2
Toll-like Receptor Signaling WP3858	11355	0.0942274	1	0	0	3.86324	9.12515	IRAK4;TIRAP
Trans-sulfuration and one carbon metabolism WP2525	11355	0.0942274	1	0	0	3.86324	9.12515	DHFR2;MAT2A
Metastatic brain tumor WP2249	43836	0.0961198	1	0	0	9.98004	23.3748	PIK3R1
AGE/RAGE pathway WP2324	24167	0.0981855	1	0	0	2.72183	6.31708	MMP2;IRAK4;TIRAP
Initiation of transcription and translation elongation at the HIV-1 LTR WP3414	11720	0.0994422	1	0	0	3.74251	8.63839	PPP3CB;SUPT4H1
RAC1/PAK1/p38/MMP2 Pathway WP3303	24898	0.105025	1	0	0	2.64178	5.95338	YAP1;MMP2;PIK3R1
Glial Cell Differentiation WP2276	43837	0.111219	1	0	0	8.55432	18.7874	CNP
MicroRNA for Targeting Cancer Growth and Vascularization in Glioblastoma WP3593	43837	0.111219	1	0	0	8.55432	18.7874	HIF1AN
Fibrin Complement Receptor 3 Signaling Pathway WP4136	13547	0.126617	1	0	0	3.23677	6.68906	IRAK4;TIRAP
Amyotrophic lateral sclerosis (ALS) WP2447	13912	0.132246	1	0	0	3.15159	6.37596	PPP3CB;ALS2
DNA Mismatch Repair WP531	43839	0.140667	1	0	0	6.65336	13.0496	MLH1
Methylation Pathways WP704	43839	0.140667	1	0	0	6.65336	13.0496	MAT2A
Bladder Cancer WP2828	14642	0.143667	1	0	0	2.99401	5.80915	MMP2;PIK3R1
DNA IR-damage and cellular response via ATR WP4016	29281	0.14961	1	0	0	2.24551	4.26584	SMARCAL1;RBBP8;MLH1
Steroid Biosynthesis WP496	43840	0.155025	1	0	0	5.98802	11.1627	HSD17B1
Splicing factor NOVA regulated synaptic proteins WP4148	15373	0.155285	1	0	0	2.85144	5.31078	APLP2;STX2
Prostaglandin Synthesis and Regulation WP98	16469	0.173027	1	0	0	2.66134	4.66882	EDNRB;ANXA2
IL-10 Anti-inflammatory Signaling Pathway WP4495	43842	0.183026	1	0	0	4.99002	8.47369	BLVRA
Cell-type Dependent Selectivity of CCK2R Signaling WP3679	43843	0.196677	1	0	0	4.60617	7.49051	CNR1
One carbon metabolism and related pathways WP3940	19025	0.21549	1	0	0	2.30309	3.53487	DHFR2;MAT2A
Brain-Derived Neurotrophic Factor (BDNF) signaling pathway WP2380	4/144	0.220754	1	0	0	1.66334	2.51282	DLG1;MARCKS;CNR1;PIK3R1
IL-4 Signaling Pathway WP395	19756	0.227805	1	0	0	2.21779	3.2807	STAT6;PIK3R1
IL-1 signaling pathway WP195	20121	0.233981	1	0	0	2.17746	3.1628	IRAK4;PIK3R1
Hedgehog Signaling Pathway WP47	43846	0.236283	1	0	0	3.74251	5.39942	STK36
Interactome of polycomb repressive complex 2 (PRC2) WP2916	43846	0.236283	1	0	0	3.74251	5.39942	SETX
Metabolic pathway of LDL, HDL and TG, including diseases WP4522	43846	0.236283	1	0	0	3.74251	5.39942	ANXA2
Toll-like Receptor Signaling Pathway WP75	3/103	0.247252	1	0	0	1.74408	2.43709	PIK3R1;IRAK4;TIRAP
Serotonin and anxiety WP3947	43847	0.249047	1	0	0	3.52237	4.89649	FMR1
IL-9 Signaling Pathway WP22	43847	0.249047	1	0	0	3.52237	4.89649	PIK3R1
miR-509-3p alteration of YAP1/ECM axis WP3967	43847	0.249047	1	0	0	3.52237	4.89649	YAP1
Small Ligand GPCRs WP247	43849	0.273941	1	0	0	3.15159	4.08082	CNR1
Genotoxicity pathway WP4286	23043	0.283573	1	0	0	1.90096	2.39576	TP53I3;RBM12B
Hereditary leiomyomatosis and renal cell carcinoma pathway WP4206	43850	0.286078	1	0	0	2.99401	3.74698	CUL3
Pathways Affected in Adenoid Cystic Carcinoma WP3651	23774	0.295956	1	0	0	1.84247	2.24329	MGA;ARID4B
Methionine De Novo and Salvage Pathway WP3580	43852	0.309748	1	0	0	2.72183	3.18998	MAT2A
NRF2-ARE regulation WP4357	43853	0.321287	1	0	0	2.60349	2.95605	CUL3
Glutathione metabolism WP100	43853	0.321287	1	0	0	2.60349	2.95605	ANPEP
miRNA regulation of p53 pathway in prostate cancer WP3982	43854	0.332635	1	0	0	2.49501	2.74628	PERP
Physiological and Pathological Hypertrophy of the Heart WP1528	43855	0.343793	1	0	0	2.39521	2.5574	PPP3CB
IL-7 Signaling Pathway WP205	43855	0.343793	1	0	0	2.39521	2.5574	PIK3R1
mRNA Processing WP411	3/126	0.351808	1	0	0	1.42572	1.48941	CELF2;CSTF2T;SREK1
Canonical and Non-canonical Notch signaling WP3845	43857	0.365555	1	0	0	2.21779	2.23184	MFAP2
TGF-beta Signaling Pathway WP366	3/132	0.37909	1	0	0	1.36091	1.32006	YAP1;ZFYVE9;PIK3R1
Cannabinoid receptor signaling WP3869	43859	0.386597	1	0	0	2.06484	1.96236	CNR1
Oligodendrocyte Specification and differentiation(including remyelination), leading to Myelin Components for CNS WP4304	43860	0.396856	1	0	0	1.99601	1.84467	CNP
MicroRNAs in cardiomyocyte hypertrophy WP1544	30713	0.410584	1	0	0	1.42572	1.26914	PPP3CB;PIK3R1
Regulation of toll-like receptor signaling pathway WP1449	3/139	0.410596	1	0	0	1.29238	1.1504	PIK3R1;IRAK4;TIRAP
Ovarian Infertility Genes WP34	11689	0.416863	1	0	0	1.87126	1.63735	MLH1
Alpha 6 Beta 4 signaling pathway WP244	12055	0.426617	1	0	0	1.81455	1.54576	PIK3R1
Prion disease pathway WP3995	12055	0.426617	1	0	0	1.81455	1.54576	RFX5
Endothelin Pathways WP2197	12055	0.426617	1	0	0	1.81455	1.54576	EDNRB
Androgen receptor signaling pathway WP138	32905	0.444963	1	0	0	1.33067	1.07753	EFCAB6;PIK3R1
Photodynamic therapy-induced NF-kB survival signaling WP3617	12785	0.44564	1	0	0	1.71086	1.3828	MMP2
Photodynamic therapy-induced HIF-1 survival signaling WP3614	13516	0.464033	1	0	0	1.61838	1.2426	HIF1AN
The effect of progerin on the involved genes in Hutchinson-Gilford Progeria Syndrome WP4320	13516	0.464033	1	0	0	1.61838	1.2426	CHD3
Type II interferon signaling (IFNG) WP619	13516	0.464033	1	0	0	1.61838	1.2426	IFIT2
miRNAs involvement in the immune response in sepsis WP4329	13516	0.464033	1	0	0	1.61838	1.2426	IRAK4
PDGF Pathway WP2526	14246	0.481818	1	0	0	1.53539	1.12113	PIK3R1
Ferroptosis WP4313	14611	0.490488	1	0	0	1.49701	1.0664	MAP1LC3B
IL-5 Signaling Pathway WP127	14611	0.490488	1	0	0	1.49701	1.0664	PIK3R1
Microglia Pathogen Phagocytosis Pathway WP3937	14611	0.490488	1	0	0	1.49701	1.0664	PIK3R1
IL-2 Signaling Pathway WP49	15342	0.507398	1	0	0	1.42572	0.967294	PIK3R1
Vitamin A and Carotenoid Metabolism WP716	15707	0.515642	1	0	0	1.39256	0.922355	RDH10
IL-6 signaling pathway WP364	15707	0.515642	1	0	0	1.39256	0.922355	PIK3R1
Hedgehog Signaling Pathway WP4249	16072	0.523748	1	0	0	1.36091	0.880165	CUL3
Interleukin-11 Signaling Pathway WP2332	16072	0.523748	1	0	0	1.36091	0.880165	PIK3R1
Senescence and Autophagy in Cancer WP615	2/105	0.525705	1	0	0	1.14058	0.733407	MAP1LC3B;ATG13
ATM Signaling Network in Development and Disease WP3878	16438	0.531719	1	0	0	1.33067	0.840506	RBBP8
Energy Metabolism WP1541	17168	0.547264	1	0	0	1.27405	0.768027	PPP3CB
Thymic Stromal LymphoPoietin (TSLP) Signaling Pathway WP2203	17168	0.547264	1	0	0	1.27405	0.768027	STAT6
DNA Damage Response (only ATM dependent) WP710	2/110	0.550811	1	0	0	1.08873	0.64928	CCNG2;PIK3R1
Rett syndrome causing genes WP4312	17533	0.554842	1	0	0	1.2475	0.73487	KDM5B
Structural Pathway of Interleukin 1 (IL-1) WP2637	17899	0.562294	1	0	0	1.22205	0.703568	IRAK4
IL-3 Signaling Pathway WP286	17899	0.562294	1	0	0	1.22205	0.703568	PIK3R1
Photodynamic therapy-induced AP-1 survival signaling. WP3611	18264	0.569622	1	0	0	1.1976	0.673991	MMP2
Synaptic signaling pathways associated with autism spectrum disorder WP4539	18264	0.569622	1	0	0	1.1976	0.673991	PIK3R1
Wnt Signaling WP428	2/115	0.574969	1	0	0	1.0414	0.57635	PPP3CB;CHD8
Synaptic Vesicle Pathway WP2267	18629	0.576827	1	0	0	1.17412	0.646017	STX2
Cardiac Progenitor Differentiation WP2406	19360	0.590879	1	0	0	1.12982	0.594446	ANPEP
TGF-beta Receptor Signaling WP560	19725	0.597729	1	0	0	1.10889	0.570655	ZFYVE9
Interferon type I signaling pathways WP585	19725	0.597729	1	0	0	1.10889	0.570655	PIK3R1
DNA IR-Double Strand Breaks (DSBs) and cellular response via ATM WP3959	20090	0.604466	1	0	0	1.08873	0.548079	YAP1
RANKL/RANK (Receptor activator of NFKB (ligand)) Signaling Pathway WP2018	20090	0.604466	1	0	0	1.08873	0.548079	PIK3R1
Complement and Coagulation Cascades WP558	21186	0.624006	1	0	0	1.03242	0.486883	SERPING1
Kit receptor signaling pathway WP304	21551	0.630304	1	0	0	1.01492	0.468439	PIK3R1
MET in type 1 papillary renal cell carcinoma WP4205	21551	0.630304	1	0	0	1.01492	0.468439	PIK3R1
Notch Signaling Pathway WP61	22282	0.642585	1	0	0	0.981643	0.434138	PIK3R1
T-Cell antigen Receptor (TCR) pathway during Staphylococcus aureus infection WP3863	22647	0.648572	1	0	0	0.96581	0.418179	DLG1
MECP2 and Associated Rett Syndrome WP3584	22647	0.648572	1	0	0	0.96581	0.418179	CNP
Endometrial cancer WP4155	23012	0.654459	1	0	0	0.95048	0.402953	PIK3R1
Lung fibrosis WP3624	23012	0.654459	1	0	0	0.95048	0.402953	MMP2
Circadian rhythm related genes WP3594	3/201	0.655413	1	0	0	0.893735	0.377593	SETX;KDM5A;RBM4
G1 to S cell cycle control WP45	23377	0.660248	1	0	0	0.935629	0.388417	CCNG2
Oncostatin M Signaling Pathway WP2374	23743	0.66594	1	0	0	0.921234	0.374534	PIK3R1
Non-small cell lung cancer WP4255	24108	0.671537	1	0	0	0.907276	0.361265	PIK3R1
Human Thyroid Stimulating Hormone (TSH) signaling pathway WP2032	24108	0.671537	1	0	0	0.907276	0.361265	PIK3R1
Endoderm Differentiation WP2853	2/141	0.685176	1	0	0	0.849365	0.321127	MBTD1;DUSP5
AMP-activated Protein Kinase (AMPK) Signaling WP1403	25204	0.687773	1	0	0	0.86783	0.324826	PIK3R1
Primary Focal Segmental Glomerulosclerosis FSGS WP2572	26299	0.703209	1	0	0	0.83167	0.292832	SMARCAL1
Mesodermal Commitment Pathway WP2857	2/147	0.707025	1	0	0	0.814697	0.282447	MBTD1;YAP1
Chromosomal and microsatellite instability in colorectal cancer WP4216	26665	0.708183	1	0	0	0.820277	0.283039	MLH1
Peptide GPCRs WP24	27030	0.713074	1	0	0	0.809192	0.273645	EDNRB
Prolactin Signaling Pathway WP2037	27760	0.722613	1	0	0	0.787898	0.255974	PIK3R1
Leptin signaling pathway WP2034	27760	0.722613	1	0	0	0.787898	0.255974	PIK3R1
Epithelial to mesenchymal transition in colorectal cancer WP4239	2/159	0.746935	1	0	0	0.753211	0.21977	MMP2;PIK3R1
Signaling Pathways in Glioblastoma WP2261	29952	0.749372	1	0	0	0.730247	0.21069	PIK3R1
Alzheimers Disease WP2059	30317	0.753575	1	0	0	0.721449	0.204117	PPP3CB
VEGFA-VEGFR2 Signaling Pathway WP3888	3/236	0.757344	1	0	0	0.761189	0.211563	MMP2;STAT6;PIK3R1
Apoptosis WP254	30682	0.757708	1	0	0	0.71286	0.197789	PIK3R1
Viral Acute Myocarditis WP4298	30682	0.757708	1	0	0	0.71286	0.197789	PIK3R1
ncRNAs involved in Wnt signaling in hepatocellular carcinoma WP4336	31413	0.765766	1	0	0	0.696282	0.185823	CHD8
Hair Follicle Development: Cytodifferentiation (Part 3 of 3) WP2840	31778	0.769695	1	0	0	0.688279	0.180165	PERP
Pancreatic adenocarcinoma pathway WP4263	32509	0.777356	1	0	0	0.672812	0.169452	PIK3R1
T-Cell antigen Receptor (TCR) Signaling Pathway WP69	32874	0.781091	1	0	0	0.665336	0.164381	PIK3R1
ErbB Signaling Pathway WP673	33239	0.784763	1	0	0	0.658025	0.159488	PIK3R1
GPCRs, Other WP117	33239	0.784763	1	0	0	0.658025	0.159488	CNR1
LncRNA involvement in canonical Wnt signaling and colorectal cancer WP4258	34335	0.795415	1	0	0	0.637024	0.145809	CHD8
B Cell Receptor Signaling Pathway WP23	35431	0.805542	1	0	0	0.617322	0.13349	PIK3R1
Human Complement System WP2806	35431	0.805542	1	0	0	0.617322	0.13349	SERPING1
Thermogenesis WP4321	1/108	0.83858	1	0	0	0.554447	0.0976076	CNR1
Ebola Virus Pathway on Host WP4217	1/129	0.886904	1	0	0	0.464188	0.055711	PIK3R1
Adipogenesis WP236	1/130	0.888805	1	0	0	0.460617	0.0542963	STAT6
Angiopoietin Like Protein 8 Regulatory Pathway WP3915	1/132	0.892512	1	0	0	0.453638	0.0515856	PIK3R1
Ectoderm Differentiation WP2858	1/138	0.902909	1	0	0	0.433915	0.0443171	TTC14
NRF2 pathway WP2884	1/146	0.915229	1	0	0	0.410139	0.0363304	SLC5A3
Regulation of Actin Cytoskeleton WP51	1/150	0.920791	1	0	0	0.399202	0.0329428	PIK3R1
Integrated Breast Cancer Pathway WP1984	1/151	0.922124	1	0	0	0.396558	0.0321511	TPR
Breast cancer pathway WP4262	1/154	0.92599	1	0	0	0.388833	0.0298982	PIK3R1
Nonalcoholic fatty liver disease WP4396	1/155	0.927235	1	0	0	0.386324	0.029186	PIK3R1
GPCRs, Class A Rhodopsin-like WP455	2/257	0.930453	1	0	0	0.465994	0.0335903	EDNRB;CNR1
Insulin Signaling WP481	1/160	0.933156	1	0	0	0.374251	0.0258917	PIK3R1
EGF/EGFR Signaling Pathway WP437	1/162	0.935388	1	0	0	0.369631	0.0246891	PIK3R1
Chemokine signaling pathway WP3929	1/164	0.937545	1	0	0	0.365123	0.0235469	PIK3R1
Metapathway biotransformation Phase I and II WP702	1/183	0.954775	1	0	0	0.327214	0.0151435	NAA40
Ras Signaling WP4223	1/184	0.955537	1	0	0	0.325436	0.0148015	PIK3R1
Focal Adhesion WP306	1/198	0.964956	1	0	0	0.302425	0.0107885	PIK3R1
MAPK Signaling Pathway WP382	1/246	0.984525	1	0	0	0.243416	0.00379622	PPP3CB
Focal Adhesion-PI3K-Akt-mTOR-signaling pathway WP3932	1/303	0.994152	1	0	0	0.197625	0.00115909	PIK3R1
Nuclear Receptors Meta-Pathway WP2882	1/319	0.995552	1	0	0	0.187712	0.000836845	SLC5A3
PI3K-Akt Signaling Pathway WP4172	1/340	0.996895	1	0	0	0.176118	0.00054777	PIK3R1

## Sheet: cluster 10
Term	Overlap	P-value	Adjusted P-value	Old P-value	Old Adjusted P-value	Odds Ratio	Combined Score	Genes
VEGFA-VEGFR2 Signaling Pathway WP3888	31/236	6.64227e-07	0.000313515	0	0	2.66172	37.862	GSK3B;HDAC5;PRKAA2;ITGB3;NDRG1;RELA;HERPUD1;RPS6KA5;ADAMTS1;DNAJB9;IGFBP7;ITGAV;EPS15;FGB;MAP2K4;RAB4A;JAG1;STAT1;FBXW11;PRKCE;TRPC1;NFATC2;MAPK14;SOD2;NFKB1;RCAN1;AFDN;PIK3CA;RCAN2;MAPKAPK2;ATF6
Factors and pathways affecting insulin-like growth factor (IGF1)-Akt signaling WP3850	44135	1.40566e-06	0.000331736	0	0	6.53659	88.0805	SMAD2;GSK3B;SMAD3;TRIM63;PTEN;ILK;PLD1;FBXO32;PPARGC1A;NFKB1
Exercise-induced Circadian Regulation WP410	17807	9.6575e-05	0.0151945	0	0	4.22155	39.029	DAZAP2;GSTM3;BTG1;PPP1R3C;ZFR;NCOA4;CRY2;G0S2;TOB1;HERPUD1
Mitochondrial LC-Fatty Acid Beta-Oxidation WP368	43999	0.000110073	0.0129886	0	0	7.1518	65.1841	HADHA;ACADVL;ACSL1;HADH;ACADS;ACSF2
TCA Cycle (aka Krebs or citric acid cycle) WP78	44000	0.000158235	0.0149374	0	0	6.75447	59.1113	FH;IDH2;OGDH;SUCLG1;ACO2;IDH3A
MicroRNAs in cardiomyocyte hypertrophy WP1544	13/84	0.000229308	0.0180389	0	0	3.13601	26.2811	GSK3B;MAP2K4;HDAC5;MAPK14;AGT;NFKB1;NFATC4;RCAN1;PIK3CA;NPPA;PLCB2;MAP2K5;MAPK4
Brain-Derived Neurotrophic Factor (BDNF) signaling pathway WP2380	18/144	0.000265046	0.0178716	0	0	2.53293	20.8602	MEF2A;STAT5B;GSK3B;PRKAA2;STAT1;SORT1;KIDINS220;CAMK2A;RANBP9;MAPK14;NFKB1;RELA;NFATC4;RPS6KA5;SIRPA;KCNN2;MAP2K5;SH2B1
TGF-beta Signaling Pathway WP366	17/132	0.000271916	0.016043	0	0	2.60968	21.4255	MEF2A;SMAD2;MAP2K4;SMAD3;SMURF1;TGFB1I1;ITGB3;NEDD9;MAPK14;THBS1;TGFBR3;RBL2;ZFYVE16;STAMBPL1;BTRC;SOS1;MAPK4
Oncostatin M Signaling Pathway WP2374	24047	0.000309302	0.0162212	0	0	3.42919	27.712	STAT5B;CDKN1B;PRKCH;STAT1;PRKCE;TIMP3;TYK2;SOS1;MAPK14;RELA;NFKB1
Energy Metabolism WP1541	17411	0.000419016	0.0197776	0	0	3.88023	30.1789	MEF2A;GSK3B;PRKAA2;PRKAG2;MAPK14;PPARA;MEF2D;PPARGC1A;PPARD
Sterol Regulatory Element-Binding Proteins (SREBP) signalling WP1982	25508	0.000526655	0.0225983	0	0	3.2304	24.3862	CDK8;SEC24B;PRKAA2;PIK3CA;RNF139;SAR1B;PRKAG2;PRKACA;ATF6;MBTPS2;SEC31A
Adipogenesis WP236	16/130	0.000676405	0.0266052	0	0	2.49396	18.2027	RB1;MEF2A;STAT5B;NCOA2;SMAD3;STAT1;AGT;RBL2;LMNA;RARA;SPOCK1;PPARA;PPARGC1A;RXRG;MEF2D;PPARD
Myometrial Relaxation and Contraction Pathways WP289	18/156	0.000703174	0.0255306	0	0	2.33809	16.9743	CAMK2B;RYR2;RAMP2;PRKCH;PRKCE;CAMK2A;ITPR1;GNG11;NFKB1;CNN1;RGS3;GNG5;PRKAR1A;PKIA;PDE4B;PRKACA;RAMP1;CORIN
Insulin Signaling WP481	18/160	0.000947243	0.0319356	0	0	2.27964	15.8707	MAP2K4;GSK3B;MAP3K3;RAB4A;PRKCH;PRKAA2;PTEN;MAPK14;GYS1;RPS6KA5;PIK3CA;SOS1;SOS2;PFKM;MAP2K5;VAMP2;MAPK4;MAP4K4
Pathways Regulating Hippo Signaling WP4540	13/98	0.00104361	0.0328388	0	0	2.68801	18.4534	SMAD2;PRKCH;SMAD3;PRKAA2;PRKCE;PRKAG2;CDH6;PRKAR1A;CDH13;PRKACA;TEAD1;PLCB2;TEAD3
EGF/EGFR Signaling Pathway WP437	18/162	0.00109426	0.0322806	0	0	2.25149	15.35	MEF2A;STAT5B;MAP3K3;CAV2;STAT1;CAMK2A;PTEN;ASAP1;GAB2;PLD1;MAPK14;RPS6KA5;SOS1;SOS2;EPS15;MEF2D;MAP2K5;MAPK4
Fatty Acid Beta Oxidation WP143	12601	0.0011636	0.0323071	0	0	4.17188	28.1862	HADHA;ACADVL;ACSL1;HADH;ACADS;CRAT;DECR1
IL-4 Signaling Pathway WP395	19968	0.00120097	0.0314921	0	0	3.37724	22.7107	STAT5B;PIK3CA;STAT1;GAB2;TYK2;SOS1;MAPK14;RELA;NFKB1
Leptin signaling pathway WP2034	28065	0.00120881	0.0300293	0	0	2.93286	19.7033	GSK3B;STAT5B;PRKAA2;STAT1;PTEN;LEPR;SOS1;MAPK14;RELA;NFKB1;SH2B1
Cardiac Hypertrophic Response WP2795	20333	0.00137414	0.0324298	0	0	3.31583	21.8511	MEF2A;GSK3B;MAP2K4;HDAC5;NPPA;NFATC2;MAPK14;MAP2K5;NFKB1
Aryl Hydrocarbon Receptor WP2586	17015	0.00167744	0.0377024	0	0	3.52407	22.5206	RB1;CDKN1B;AIP;NF1;CD36;RELA;NFKB1;NFE2L2
Angiopoietin Like Protein 8 Regulatory Pathway WP3915	15/132	0.00220404	0.0472866	0	0	2.30266	14.0865	MAP2K4;GSK3B;MAP3K3;PRKAA2;THRA;PRKAG2;MAPK14;GYS1;RPS6KA5;PIK3CA;SOS1;SOS2;MAP2K5;MAPK4;MAP4K4
Ciliary landscape WP4352	21/216	0.00241322	0.0495234	0	0	1.97006	11.8731	RB1;BBS2;RAB2A;ZYG11B;UBE2H;WDR26;DYNLT1;NEK7;CAMK2A;RANBP9;ARFGAP3;DCAF7;NFKB1;EHBP1;EHD3;XPNPEP3;TIPRL;TMED1;DCAF11;SNAP29;CLUAP1
Non-genomic actions of 1,25 dihydroxyvitamin D3 WP4341	26207	0.0024495	0.0481735	0	0	2.854	17.1579	CAMK2B;PRKCH;STAT1;PRKCE;CAMK2A;TYK2;MAPK14;PLCB2;RXRG;NFKB1
Lipid Metabolism Pathway WP3965	44011	0.00254352	0.0480216	0	0	4.19243	25.0465	BCKDHA;PRKAA2;PDHA1;PRKAR1A;PRKAG2;PRKACA
miRs in Muscle Cell Differentiation WP2012	44011	0.00254352	0.0461746	0	0	4.19243	25.0465	MEF2A;PRKCH;PRKAR1A;PRKCE;PRKACA;MEF2D
Structural Pathway of Interleukin 1 (IL-1) WP2637	18111	0.00254511	0.0444923	0	0	3.30831	19.7625	MAP2K4;MAP3K3;RPS6KA5;MAPKAPK2;MAPK14;TANK;RELA;NFKB1
Calcium Regulation in the Cardiac Cell WP536	16/149	0.0028587	0.0481895	0	0	2.17594	12.7453	CHRM2;CAMK2B;RYR2;PRKCH;PRKCE;CAMK2A;ITPR1;CACNA1C;ATP1B1;GNG11;RGS3;GJA3;GNG5;PRKAR1A;PKIA;PRKACA
Synaptic signaling pathways associated with autism spectrum disorder WP4539	18476	0.00290135	0.047222	0	0	3.24215	18.9425	CAMK2B;GSK3B;PRKAA2;PIK3CA;PTEN;NF1;PRKAG2;CACNA1C
Osteopontin Signaling WP1434	43934	0.00294577	0.0463467	0	0	6.2349	36.3332	ITGB3;ITGAV;RELA;NFKB1
PI3K-Akt Signaling Pathway WP4172	29/340	0.00306003	0.0465915	0	0	1.72835	10.006	CHRM2;GSK3B;CDKN1B;PRKAA2;CSF1;ITGB3;LAMA4;PTEN;THBS1;RELA;GYS1;FGF7;GNG5;ITGAV;ANGPT1;HGF;F2R;VEGFB;VEGFC;PPP2R5A;PPP2R3A;GNG11;NFKB1;RBL2;PIK3CA;COL6A3;PKN2;SOS1;SOS2
Glycogen Synthesis and Degradation WP500	14793	0.00311853	0.0459983	0	0	3.5461	20.4624	GSK3B;PYGB;GYS1;PPP2R5A;PYGM;PHKB;PPP2R3A
PI3K/AKT/mTOR - VitD3 Signalling WP4141	43973	0.00377864	0.054046	0	0	4.60532	25.6903	GSK3B;PRKAA2;PDHA1;PIK3CA;RELA
H19 action Rb-E2F1 signaling and CDK-Beta-catenin activity WP3969	43935	0.00396441	0.0550353	0	0	5.78955	32.0185	RB1;CDK8;JAG1;CSRP2
Prolactin Signaling Pathway WP2037	28034	0.00406024	0.0547553	0	0	2.66624	14.6817	GSK3B;STAT5B;PIK3CA;STAT1;SIRPA;GAB2;SOS1;MAPK14;RELA;NFKB1
Initiation of transcription and translation elongation at the HIV-1 LTR WP3414	11841	0.00427846	0.0560953	0	0	3.79939	20.7225	HDAC5;NFATC2;HDAC8;RELA;NFKB1;NFATC4
Monoamine Transport WP727	11841	0.00427846	0.0545792	0	0	3.79939	20.7225	RBL2;TGFB1I1;ITGB3;FBXO32;MAPK14;AGT
Focal Adhesion WP306	19/198	0.00436745	0.0542484	0	0	1.94447	10.5654	GSK3B;PPP1R12A;CAV2;HGF;ITGB3;LAMA4;VEGFB;PTEN;VEGFC;ILK;PARVA;PARVB;ARHGAP5;THBS1;PIK3CA;ITGAV;TLN1;PPP1R12B;SOS1
Focal Adhesion-PI3K-Akt-mTOR-signaling pathway WP3932	26/303	0.00450354	0.0545044	0	0	1.73878	9.39442	CHRM2;GSK3B;CDKN1B;PRKAA2;CSF1;CAB39L;ITGB3;LAMA4;PTEN;THBS1;GYS1;FGF7;GNG5;ITGAV;PPARGC1A;RAB2A;ANGPT1;HGF;F2R;VEGFB;VEGFC;PPP2R5A;PPP2R3A;GNG11;PIK3CA;SOS1
Resistin as a regulator of inflammation WP4481	12206	0.00501487	0.0591754	0	0	3.68426	19.5094	PIK3CA;ITPR1;MAPK14;PLCB2;RELA;NFKB1
miRNA regulation of prostate cancer signaling pathways WP3981	12206	0.00501487	0.0577321	0	0	3.68426	19.5094	GSK3B;CDKN1B;PIK3CA;PLCL2;SOS1;NFKB1
FTO Obesity Variant Mechanism WP3407	43898	0.00556614	0.0625528	0	0	7.59878	39.4457	FTO;PRDM16;PPARGC1A
p38 MAPK Signaling Pathway WP400	12571	0.00584014	0.0641057	0	0	3.5759	18.3908	MAP2K4;RPS6KA5;STAT1;MAPKAPK2;MAPK14;MEF2D
TCA Cycle and Deficiency of Pyruvate Dehydrogenase complex (PDHc) WP2453	43937	0.00666217	0.0714669	0	0	5.06586	25.3866	FH;PDHA1;OGDH;IDH3A
Hypothesized Pathways in Pathogenesis of Cardiovascular Disease WP3668	43976	0.00674505	0.0707481	0	0	4.05268	20.2592	SMAD2;TGFBR3;SMAD3;MAPK14;ENG
NO/cGMP/PKG mediated Neuroprotection WP4008	17349	0.0078081	0.0801179	0	0	3.01796	14.6449	CAMK2B;NPR1;CAMK2A;NPPA;AKAP9;RELA;NFKB1
Thymic Stromal LymphoPoietin (TSLP) Signaling Pathway WP2203	17349	0.0078081	0.0784132	0	0	3.01796	14.6449	STAT5B;PIK3CA;STAT1;GAB2;MAPK14;RELA;NFKB1
Thiamine metabolic pathways WP4297	43899	0.00804503	0.0791094	0	0	6.75447	32.5748	BCKDHA;PDHA1;OGDH
B Cell Receptor Signaling Pathway WP23	35735	0.00825098	0.0794788	0	0	2.29791	11.0241	GSK3B;BCL6;CAMK2A;NFATC2;GAB2;SOS1;MAPK14;MEF2D;NFKB1;RELA;MAPK4
Canonical and Non-Canonical TGF-B signaling WP3874	43938	0.00837664	0.0790755	0	0	4.76786	22.8014	SMAD2;SMAD3;LOXL4;MAPK14
Primary Focal Segmental Glomerulosclerosis FSGS WP2572	26543	0.00874573	0.0809409	0	0	2.53293	12.004	SCARB2;CAMK2B;CDKN1B;JAG1;ITGB3;ILK;ITGAV;PARVA;TLN1
Simplified Interaction Map Between LOXL4 and Oxidative Stress Pathway WP3670	43939	0.0103561	0.0940014	0	0	4.50298	20.5794	FGF7;LOXL4;IGFBP7;NFE2L2
Transcription co-factors SKI and SKIL protein partners WP4533	43939	0.0103561	0.0922278	0	0	4.50298	20.5794	MECP2;NF1;TEAD1;TEAD3
PDGFR-beta pathway WP3972	43980	0.0128162	0.112023	0	0	3.49369	15.2222	STAT5B;MAP2K4;PIK3CA;STAT1;SOS1
Endochondral Ossification WP474	23590	0.0130838	0.112283	0	0	2.53293	10.9837	STAT5B;SCIN;THRA;ADAMTS1;STAT1;TIMP3;PRKACA;BMP7
Androgen receptor signaling pathway WP138	33147	0.0131574	0.110898	0	0	2.25149	9.7507	RB1;GSK3B;NCOA2;KAT2B;SMAD3;TGFB1I1;NCOA4;PTEN;DSTN;RELA
Amino Acid metabolism WP3925	33512	0.0141495	0.117168	0	0	2.22675	9.48167	FH;PDHA1;GOT1;P4HA2;ALDH1A1;OGDH;SUCLG1;ACO2;HADH;ACAA1
PI3K-AKT-mTOR signaling pathway and therapeutic opportunities WP3844	43981	0.0147698	0.120195	0	0	3.37724	14.2356	GSK3B;CDKN1B;PIK3CA;PTEN;TFEB
G Protein Signaling Pathways WP35	34243	0.0163001	0.130401	0	0	2.17886	8.96947	PRKCH;GNG5;PRKAR1A;PRKCE;AKAP9;PDE4B;ITPR1;PRKACA;PDE8A;GNG11
TGF-beta Receptor Signaling WP560	19906	0.0163524	0.128639	0	0	2.62674	10.8048	TGFBR3;SMAD2;SMAD3;STAT1;THBS1;NFKB1;ENG
Ethanol effects on histone modifications WP3996	43982	0.016913	0.130868	0	0	3.26829	13.3336	HDAC5;KAT2B;ALDH1A1;MTHFR;HDAC8
PPAR signaling pathway WP3942	24685	0.0169575	0.129096	0	0	2.41951	9.86447	FABP3;ACSL1;ILK;CD36;ACAA1;PPARA;RXRG;PPARD
Hematopoietic Stem Cell Differentiation WP2849	20271	0.0179642	0.134589	0	0	2.57898	10.3659	KCNH2;CSF1;RIOK3;ITGB3;NFATC2;CBFA2T3;FLI1
IL-6 signaling pathway WP364	15858	0.0182119	0.134313	0	0	2.82745	11.3259	GSK3B;MAP2K4;STAT1;TYK2;SOS1;AGT
Vitamin A and Carotenoid Metabolism WP716	15858	0.0182119	0.132247	0	0	2.82745	11.3259	ALDH1A1;RARA;CD36;BCO2;RXRG;DHRS3
RAC1/PAK1/p38/MMP2 Pathway WP3303	25051	0.0184149	0.131694	0	0	2.38393	9.52285	STAT5B;PIK3CA;ANGPT1;TIE1;SOS1;MAPK14;RELA;NFKB1
DNA Damage Response (only ATM dependent) WP710	11/110	0.0199439	0.1405	0	0	2.02634	7.93279	RBL2;GSK3B;SMAD3;CDKN1B;BCL6;PIK3CA;PTEN;SOS1;SOD2;SOS2;NFKB1
MAPK Signaling Pathway WP382	20/246	0.0200205	0.138966	0	0	1.64743	6.44311	MAP2K4;DUSP3;CACNA1C;MAPK14;DUSP9;RELA;NFKB1;FGF7;RPS6KA5;MRAS;TAOK1;MAPKAPK2;MAP3K20;NF1;RAPGEF2;PRKACA;SOS1;SOS2;MAP2K5;MAP4K4
Ras Signaling WP4223	16/184	0.0201562	0.13788	0	0	1.76204	6.87942	RAB5B;GAB2;PLD1;GNG11;NFKB1;RELA;AFDN;MRAS;PIK3CA;GNG5;RASSF5;NF1;SHOC2;PRKACA;SOS1;SOS2
Integrated Cancer Pathway WP1971	16224	0.0202341	0.136436	0	0	2.76319	10.7775	RB1;SMAD2;CDKN1B;SMAD3;STAT1;PTEN
Fatty Acid Biosynthesis WP357	43943	0.0211811	0.140809	0	0	3.68426	14.2015	ACSL1;ECH1;HADH;DECR1
Vitamin D in inflammatory diseases WP4482	43943	0.0211811	0.138854	0	0	3.68426	14.2015	SMAD3;MAPK14;RELA;NFKB1
Circadian rhythm related genes WP3594	17/201	0.0216683	0.140102	0	0	1.71382	6.5672	NCOA2;GSK3B;ZFHX3;PRKAA2;FBXW11;KCNH7;MTTP;USP2;CREM;PTEN;PROX1;HEBP1;CLDN4;CRY2;BTRC;PPARA;PPARGC1A
Nuclear Receptors in Lipid Metabolism and Toxicity WP299	12175	0.0217952	0.139018	0	0	3.07022	11.7468	ABCD3;RARA;PPARA;ABCG1;PPARD
Cell-type Dependent Selectivity of CCK2R Signaling WP3679	43903	0.0236365	0.148752	0	0	4.67617	17.5121	RYR2;TRPC1;ITPR1
Cell Differentiation - Index WP2029	43903	0.0236365	0.146795	0	0	4.67617	17.5121	MEF2A;HDAC5;MEF2D
ncRNAs involved in STAT3 signaling in hepatocellular carcinoma WP4337	43903	0.0236365	0.144889	0	0	4.67617	17.5121	IL11RA;RELA;NFKB1
Estrogen signaling pathway WP712	43944	0.0246645	0.149252	0	0	3.52407	13.0475	PIK3CA;MAPK14;PRKACA;NFKB1
Hippo-Yap signaling pathway WP4537	43944	0.0246645	0.147363	0	0	3.52407	13.0475	NDRG1;TEAD1;MAP4K4;TEAD3
Regulation of Microtubule Cytoskeleton WP2038	16954	0.024724	0.145871	0	0	2.64306	9.77926	GSK3B;PIK3CA;TAOK1;MAPKAPK2;PTEN;PRKACA
Selenium Metabolism and Selenoproteins WP28	16954	0.024724	0.14407	0	0	2.64306	9.77926	CREM;SELENOT;SELENOK;RELA;NFKB1;NFE2L2
Ebola Virus Pathway on Host WP4217	12/129	0.025824	0.148646	0	0	1.88497	6.8923	TSG101;SCIN;PIK3CA;CAV2;STAT1;AXL;ITGB3;CLTB;ITGAV;EPS15;NFKB1;RELA
Epithelial to mesenchymal transition in colorectal cancer WP4239	14/159	0.025929	0.147452	0	0	1.7842	6.5166	SMAD2;MAP2K4;GSK3B;SMAD3;JAG1;TUSC3;FZD6;PROX1;MAPK14;CLDN4;PIK3CA;SOS1;SOS2;MEF2D
Angiogenesis WP1539	43945	0.0284733	0.159993	0	0	3.37724	12.0189	ANGPT1;PIK3CA;TIMP3;MAPK14
IL-7 Signaling Pathway WP205	43946	0.032612	0.181093	0	0	3.24215	11.0981	GSK3B;STAT5B;CDKN1B;STAT1
Physiological and Pathological Hypertrophy of the Heart WP1528	43946	0.032612	0.178987	0	0	3.24215	11.0981	PRKCE;MAPK14;AGT;NFATC4
Senescence and Autophagy in Cancer WP615	10/105	0.0345506	0.187447	0	0	1.92985	6.49458	RB1;GABARAPL2;GSK3B;SMAD3;CDKN1B;PTEN;IGFBP7;MAPK14;THBS1;GABARAP
Endometrial cancer WP4155	23193	0.0350216	0.187843	0	0	2.25149	7.54653	GSK3B;PIK3CA;PTEN;ILK;CTNNA3;SOS1;SOS2
Lung fibrosis WP3624	23193	0.0350216	0.185732	0	0	2.25149	7.54653	MECP2;FGF7;SERPINA1;HGF;ATP11A;BMP7;NFE2L2
ErbB Signaling Pathway WP673	33482	0.0354636	0.185987	0	0	2.00407	6.69211	CAMK2B;GSK3B;MAP2K4;STAT5B;CDKN1B;PIK3CA;CAMK2A;SOS1;SOS2
Wnt/beta-catenin Signaling Pathway in Leukemia WP3658	43947	0.0370837	0.192346	0	0	3.11745	10.2707	GSK3B;FZD6;RARA;PPARD
Nuclear Receptors WP170	14001	0.0377252	0.193547	0	0	2.66624	8.73841	THRA;RARA;PPARA;RXRG;PPARD
Thermogenesis WP4321	10/108	0.0407369	0.206751	0	0	1.87624	6.00514	PRKAA2;ACSL1;NPR1;PRDM16;PRKAG2;PRKACA;SOS1;MAPK14;PPARGC1A;SOS2
Acetylcholine Synthesis WP528	43868	0.0433008	0.217425	0	0	5.78955	18.1768	PCYT1A;PDHA1
Disorders of the Krebs cycle WP4236	43868	0.0433008	0.215137	0	0	5.78955	18.1768	FH;SUCLG1
MicroRNA for Targeting Cancer Growth and Vascularization in Glioblastoma WP3593	43868	0.0433008	0.212896	0	0	5.78955	18.1768	VEGFB;VEGFC
Molybdenum cofactor (Moco) biosynthesis WP4507	43868	0.0433008	0.210701	0	0	5.78955	18.1768	MOCS2;SUOX
AGE/RAGE pathway WP2324	24289	0.0435034	0.209527	0	0	2.14915	6.73741	SMAD2;STAT5B;SMAD3;STAT1;MAPK14;RELA;NFKB1
Folate Metabolism WP176	24289	0.0435034	0.20741	0	0	2.14915	6.73741	SLC46A1;CSF1;RFK;MTHFR;SOD2;RELA;NFKB1
Human Thyroid Stimulating Hormone (TSH) signaling pathway WP2032	24289	0.0435034	0.205336	0	0	2.14915	6.73741	RB1;RBL2;CDKN1B;PIK3CA;STAT1;PLD1;MAPK14
Non-small cell lung cancer WP4255	24289	0.0435034	0.203303	0	0	2.14915	6.73741	RB1;STAT5B;PIK3CA;RASSF5;SOS1;SOS2;RXRG
Regulation of Wnt/B-catenin Signaling by Small Molecule Compounds WP3664	43907	0.0485753	0.22478	0	0	3.5759	10.8158	GSK3B;LRP1;DKK3
miR-509-3p alteration of YAP1/ECM axis WP3967	43907	0.0485753	0.222597	0	0	3.5759	10.8158	PBX3;TEAD1;TEAD3
Signaling Pathways in Glioblastoma WP2261	30164	0.0490288	0.222515	0	0	1.97692	5.9611	RB1;MAP2K4;CDKN1B;PRKCH;PIK3CA;PTEN;NF1;MAP2K5
Sudden Infant Death Syndrome (SIDS) Susceptibility Pathways WP706	13/158	0.0492816	0.221532	0	0	1.66724	5.01875	CHRM2;KCNH2;RYR2;CREM;NFKB1;MECP2;HADHA;PRKAR1A;PRKACA;PPARGC1A;SLC25A4;VAMP2;SNTA1
T-Cell Receptor and Co-stimulatory Signaling WP2583	43950	0.0525049	0.233795	0	0	2.79496	8.23631	GSK3B;PTEN;NFATC2;NFKB1
IL-1 signaling pathway WP195	20241	0.0529389	0.233525	0	0	2.21056	6.49598	MAP2K4;MAP3K3;MAPKAPK2;MAPK14;RELA;NFKB1
Fas Ligand (FasL) pathway and Stress induction of Heat Shock Proteins (HSP) regulation WP314	15462	0.0545302	0.238317	0	0	2.41231	7.01742	RB1;MAP2K4;LMNA;ARHGDIB;MAPKAPK2
Metabolic reprogramming in colon cancer WP4290	15462	0.0545302	0.236131	0	0	2.41231	7.01742	FH;PDHA1;IDH2;ACO2;IDH3A
Splicing factor NOVA regulated synaptic proteins WP4148	15462	0.0545302	0.233984	0	0	2.41231	7.01742	EPB41L1;CAV2;TERF2IP;ANK3;MAPK4
TNF related weak inducer of apoptosis (TWEAK) Signaling Pathway WP2036	15462	0.0545302	0.231876	0	0	2.41231	7.01742	GSK3B;TRIM63;MAPK14;RELA;NFKB1
TGF-B Signaling in Thyroid Cells for Epithelial-Mesenchymal Transition WP3859	43908	0.0562191	0.236923	0	0	3.37724	9.72137	SMAD2;CDH6;SMAD3
Extracellular vesicle-mediated signaling in recipient cells WP2870	43951	0.0583103	0.243562	0	0	2.70179	7.67842	SMAD2;TGFBR3;SMAD3;HGF
Integrin-mediated Cell Adhesion WP185	9/101	0.0616786	0.255371	0	0	1.80565	5.03022	CAV2;ITGB3;ILK;ITGAV;TLN1;SOS1;MAP2K5;MYPN;MAPK4
Heart Development WP1591	16193	0.0643186	0.263986	0	0	2.30266	6.31829	VEGFB;VEGFC;NFATC2;TBX5;NFATC4
Cell Differentiation - Index expanded WP2023	43909	0.064395	0.262021	0	0	3.19949	8.7753	MEF2A;HDAC5;MEF2D
Cytosine methylation WP3585	43870	0.069546	0.280561	0	0	4.50298	12.0039	MECP2;IDH2
Folate-Alcohol and Cancer Pathway Hypotheses WP1589	43870	0.069546	0.278184	0	0	4.50298	12.0039	ALDH1A1;MTHFR
NLR Proteins WP288	43870	0.069546	0.275846	0	0	4.50298	12.0039	ERBIN;RELA
Role Altered Glycolysation of MUC1 in Tumour Microenvironment WP4480	43870	0.069546	0.273547	0	0	4.50298	12.0039	RELA;NFKB1
Supression of HMGB1 mediated inflammation by THBD WP4479	43870	0.069546	0.271287	0	0	4.50298	12.0039	RELA;NFKB1
Glycolysis and Gluconeogenesis WP534	16558	0.069558	0.269109	0	0	2.25149	6.00156	PDHA1;GOT1;PGAM2;ENO3;PFKM
Nuclear Receptors Meta-Pathway WP2882	22/319	0.071898	0.275901	0	0	1.39748	3.67887	GSTM3;NCOA2;SERPINA1;CDKN1B;ALAS1;PPP1R14C;TSC22D3;HGF;ABHD2;AIP;SMARCA1;TGFBR3;KAT2B;GSTA4;PDE4B;PPARA;ACAA1;PPARGC1A;CPEB4;PPARD;CAP2;NFE2L2
Pancreatic adenocarcinoma pathway WP4263	32721	0.0724152	0.275645	0	0	1.82143	4.78188	RB1;SMAD2;SMAD3;PIK3CA;STAT1;PLD1;RELA;NFKB1
RIG-I-like Receptor Signaling WP3865	22068	0.0746495	0.281877	0	0	2.02634	5.25826	CYLD;AZI2;MAPK14;TANK;RELA;NFKB1
Oxidative Stress WP408	12145	0.077672	0.290962	0	0	2.45617	6.27616	MAPK14;SOD2;NFKB1;NFE2L2
Neovascularisation processes WP4331	43911	0.0822603	0.305723	0	0	2.89477	7.23076	SMAD2;SMAD3;JAG1
Type III interferon signaling WP2113	43871	0.0841636	0.310353	0	0	4.05268	10.0304	STAT1;TYK2
TNF alpha Signaling Pathway WP231	33817	0.0842018	0.308087	0	0	1.76204	4.36023	MAP2K4;MAP3K3;FBXW11;RFK;BTRC;SOS1;TANK;NFKB1
Signaling of Hepatocyte Growth Factor Receptor WP313	12510	0.0847554	0.307727	0	0	2.38393	5.88351	PIK3CA;HGF;PTEN;SOS1
Rett syndrome causing genes WP4312	17654	0.086636	0.312154	0	0	2.11077	5.16303	MECP2;HDAC5;HDAC8;SMARCA1;RHOBTB2
miRNA targets in ECM and membrane receptors WP2911	43912	0.0919044	0.328628	0	0	2.76319	6.59576	LAMA4;COL6A3;THBS1
Photodynamic therapy-induced AP-1 survival signaling. WP3611	18384	0.0991269	0.351789	0	0	2.02634	4.68359	RB1;MAP2K4;FGF7;MAPK14;NFE2L2
Vitamin B12 Metabolism WP1533	18384	0.0991269	0.349164	0	0	2.02634	4.68359	MMAB;MTHFR;SOD2;RELA;NFKB1
PTF1A related regulatory pathway WP4147	43872	0.0996052	0.348249	0	0	3.68426	8.49789	KAT2B;PROX1
SRF and miRs in Smooth Muscle Differentiation and Proliferation WP1991	43872	0.0996052	0.345689	0	0	3.68426	8.49789	MEF2A;MEF2D
Serotonin Transporter Activity WP1455	43872	0.0996052	0.343165	0	0	3.68426	8.49789	TGFB1I1;ITGB3
EBV LMP1 signaling WP262	43913	0.10199	0.348837	0	0	2.64306	6.03377	MAP3K3;RELA;NFKB1
NRF2-ARE regulation WP4357	43913	0.10199	0.346327	0	0	2.64306	6.03377	GSK3B;PIK3CA;NFE2L2
The human immune response to tuberculosis WP4197	43913	0.10199	0.343853	0	0	2.64306	6.03377	STAT1;TYK2;IFIT1
Melatonin metabolism and effects WP3298	13606	0.10779	0.360829	0	0	2.19064	4.87981	GSK3B;CAMK2A;CRY2;NFKB1
IL1 and megakaryocytes in obesity WP2865	43914	0.112493	0.37392	0	0	2.53293	5.53411	PIK3CA;F2R;NFKB1
Alanine and aspartate metabolism WP106	43873	0.115754	0.382069	0	0	3.37724	7.2823	GOT1;ABAT
Bone Morphogenic Protein (BMP) Signalling and Regulation WP1425	43873	0.115754	0.379416	0	0	3.37724	7.2823	SMURF1;TOB1
Differentiation of white and brown adipocyte WP2895	43915	0.123386	0.401642	0	0	2.43161	5.088	PRDM16;PPARGC1A;BMP7
Glycosylation and related congenital defects. WP4521	43915	0.123386	0.398891	0	0	2.43161	5.088	ALG9;TUSC3;MAGT1
Signal Transduction of S1P Receptor WP26	43915	0.123386	0.396177	0	0	2.43161	5.088	S1PR1;PLCB2;MAPK4
Interferon type I signaling pathways WP585	19845	0.126621	0.403818	0	0	1.87624	3.87736	RPS6KA5;STAT1;GAB2;TYK2;MAPK14
Integrated Breast Cancer Pathway WP1984	11/151	0.12735	0.403419	0	0	1.47614	3.04206	RB1;SMAD2;USP38;STAT1;NAB1;PKIA;NF1;PTEN;FILIP1;NFKB1;HIPK2
Selenium Micronutrient Network WP15	31594	0.131937	0.415162	0	0	1.64935	3.34064	RFK;MTHFR;SELENOT;SELENOK;SOD2;RELA;NFKB1
Disorders of Folate Metabolism and Transport WP4259	43874	0.132503	0.41418	0	0	3.11745	6.30084	SLC46A1;MTHFR
MFAP5-mediated ovarian cancer cell motility and invasiveness WP3301	43874	0.132503	0.411455	0	0	3.11745	6.30084	ITGB3;ITGAV
Valproic acid pathway WP3871	43874	0.132503	0.408766	0	0	3.11745	6.30084	HADHA;ABAT
IL-5 Signaling Pathway WP127	14702	0.133305	0.408573	0	0	2.02634	4.08331	GSK3B;STAT5B;STAT1;SOS1
RANKL/RANK (Receptor activator of NFKB (ligand)) Signaling Pathway WP2018	20210	0.133989	0.408019	0	0	1.84213	3.70267	STAT1;GAB2;MAPK14;RELA;NFKB1
EPO Receptor Signaling WP581	43916	0.134642	0.40738	0	0	2.33809	4.68817	STAT5B;STAT1;SOS1
Cell Cycle WP179	9/120	0.13883	0.417375	0	0	1.51976	3.00077	RB1;SMAD2;RBL2;ANAPC13;GSK3B;STAG1;SMAD3;CDKN1B;TFDP2
Hippo-Merlin Signaling Dysregulation WP4541	9/120	0.13883	0.414733	0	0	1.51976	3.00077	CDH6;PPP1R12A;PRKAR1A;ITGB3;CDH13;ITGAV;PRKACA;TEAD1;TEAD3
Photodynamic therapy-induced unfolded protein response WP3613	43917	0.146237	0.434111	0	0	2.25149	4.32856	DNAJB9;ATF6;NFE2L2
Cysteine and methionine catabolism WP4504	43875	0.149753	0.44177	0	0	2.89477	5.49651	GOT1;SUOX
Osteoblast Signaling WP322	43875	0.149753	0.439027	0	0	2.89477	5.49651	ITGB3;ITGAV
IL-2 Signaling Pathway WP49	15432	0.151554	0.441564	0	0	1.92985	3.64127	STAT5B;STAT1;GAB2;SOS1
T-Cell antigen Receptor (TCR) Signaling Pathway WP69	33055	0.156047	0.451865	0	0	1.57604	2.92766	ITPR1;NFATC2;GAB2;SOS1;MAPK14;RELA;NFKB1
Complement and Coagulation Cascades WP558	21306	0.157189	0.452398	0	0	1.74685	3.2322	FGB;SERPINA1;F2R;MASP1;SERPINA5
Arrhythmogenic Right Ventricular Cardiomyopathy WP2118	27181	0.157864	0.451587	0	0	1.64298	3.03298	RYR2;ITGB3;LMNA;ITGAV;CTNNA3;CACNA1C
Nanoparticle-mediated activation of receptor signaling WP2643	43918	0.158141	0.449655	0	0	2.17108	4.00405	MAPK14;TLN1;SOS1
Kit receptor signaling pathway WP304	21671	0.165266	0.4671	0	0	1.71724	3.09137	STAT5B;STAT1;GAB2;SOS1;MAPK14
MET in type 1 papillary renal cell carcinoma WP4205	21671	0.165266	0.464319	0	0	1.71724	3.09137	PIK3CA;HGF;STRN;SOS1;SOS2
GPR40 Pathway WP3958	43876	0.167414	0.467571	0	0	2.70179	4.82887	PLCL1;PLCB2
Phytochemical activity on NRF2 transcriptional activation WP3	43876	0.167414	0.464821	0	0	2.70179	4.82887	PIK3CA;NFE2L2
Cannabinoid receptor signaling WP3869	43919	0.17033	0.470151	0	0	2.09622	3.71034	PRKAR1A;PRKACA;MAPK14
MAPK Cascade WP422	43919	0.17033	0.467418	0	0	2.09622	3.71034	MAP2K4;MAP3K3;MAPK14
Hedgehog Signaling Pathway WP4249	16163	0.170684	0.465682	0	0	1.84213	3.25677	SMURF1;SPOP;FBXL17;PRKACA
Interleukin-11 Signaling Pathway WP2332	16163	0.170684	0.463005	0	0	1.84213	3.25677	STAT1;IL11RA;TYK2;RELA
Corticotropin-releasing hormone signaling pathway WP2355	34151	0.175356	0.472961	0	0	1.5252	2.65528	GSK3B;NCOA2;PRKAA2;CAMK2A;MAPK14;RELA;NFKB1
ID signaling pathway WP53	43877	0.185405	0.497222	0	0	2.53293	4.26853	RB1;RBL2
SREBF and miR33 in cholesterol and lipid homeostasis WP2011	43877	0.185405	0.494412	0	0	2.53293	4.26853	PPARA;PPARGC1A
Chemokine signaling pathway WP3929	11/164	0.187702	0.497726	0	0	1.35913	2.27369	STAT5B;GSK3B;PIK3CA;GNG5;STAT1;SOS1;GNG11;SOS2;PLCB2;NFKB1;RELA
MECP2 and Associated Rett Syndrome WP3584	22767	0.190434	0.50215	0	0	1.63415	2.71015	MECP2;CSRP1;BCL6;CAMK2A;NF1
T-Cell antigen Receptor (TCR) pathway during Staphylococcus aureus infection WP3863	22767	0.190434	0.49936	0	0	1.63415	2.71015	GSK3B;PIK3CA;NFATC2;SOS1;NFKB1
Aryl Hydrocarbon Receptor Pathway WP2873	16893	0.1906	0.497035	0	0	1.76204	2.92071	CDKN1B;AIP;CAP2;NFE2L2
Mesodermal Commitment Pathway WP2857	10/147	0.190631	0.494384	0	0	1.37846	2.28469	SMAD2;SMAD3;CSRP2;ATP8B2;PRKAR1A;PBX3;PRKACA;BMP7;TEAD1;NFE2L2
IL17 signaling pathway WP2112	43921	0.195455	0.504125	0	0	1.96098	3.20114	GSK3B;RELA;NFKB1
Mechanoregulation and pathology of YAP/TAZ via Hippo and non-Hippo mechanisms WP4534	17258	0.200822	0.515151	0	0	1.72455	2.76848	ITGB3;TEAD1;MAP4K4;TEAD3
IL-9 Signaling Pathway WP22	43878	0.203649	0.519579	0	0	2.38393	3.79369	STAT5B;STAT1
Regulation of Actin Cytoskeleton WP51	10/150	0.207236	0.52589	0	0	1.35089	2.12617	CHRM2;FGF7;PPP1R12A;MRAS;PIK3CA;F2R;SSH2;SOS1;SOS2;MAPK4
Wnt Signaling WP428	8/115	0.207728	0.524318	0	0	1.40963	2.21527	CAMK2B;GSK3B;SERPINF1;FZD6;CAMK2A;NFATC2;PLCB2;NFATC4
Constitutive Androstane Receptor Pathway WP2875	11749	0.20834	0.523068	0	0	1.8997	2.97983	NCOA2;ALAS1;PPARGC1A
Ovarian Infertility Genes WP34	11749	0.20834	0.5203	0	0	1.8997	2.97983	CDKN1B;SMAD3;INHA
White fat cell differentiation WP4149	11749	0.20834	0.517562	0	0	1.8997	2.97983	STAT5B;MECOM;RARA
Pathways Affected in Adenoid Cystic Carcinoma WP3651	23863	0.216855	0.535893	0	0	1.55872	2.38255	MAGI1;PIK3CA;KAT6A;PTEN;ERBIN
Endothelin Pathways WP2197	12114	0.221407	0.544293	0	0	1.84213	2.77747	CNN1;CALCRL;RAMP1
Monoamine GPCRs WP58	12114	0.221407	0.541473	0	0	1.84213	2.77747	CHRM2;HRH2;ADRA2B
Signal transduction through IL1R WP4496	12114	0.221407	0.538682	0	0	1.84213	2.77747	MAPK14;RELA;NFKB1
Hepatitis C and Hepatocellular Carcinoma WP3646	17989	0.221729	0.536698	0	0	1.65416	2.49165	SMAD3;SOS1;MAPK14;NFKB1
IL-3 Signaling Pathway WP286	17989	0.221729	0.53396	0	0	1.65416	2.49165	STAT5B;GAB2;PRKACA;SOS1
Inhibition of exosome biogenesis and secretion by Manumycin A in CRPC cells WP4301	43879	0.222077	0.532084	0	0	2.25149	3.38789	RAB5B;MRAS
Secretion of Hydrochloric Acid in Parietal Cells WP2597	43835	0.223588	0.532998	0	0	4.05268	6.07072	HRH2
Sulindac Metabolic Pathway WP2542	43835	0.223588	0.530319	0	0	4.05268	6.07072	MSRB3
Association Between Physico-Chemical Features and Toxicity Associated Pathways WP3680	24228	0.225906	0.533137	0	0	1.53511	2.28368	GSK3B;MAP2K4;CDKN1B;FZD6;SOS1
Alzheimers Disease WP2059	30468	0.225994	0.530692	0	0	1.46483	2.17856	GSK3B;LRP1;ITPR1;CACNA1C;ATF6;PLCB2
Neural Crest Differentiation WP2064	7/101	0.231307	0.540479	0	0	1.4044	2.05605	CDH6;GSK3B;HDAC5;PMP22;HDAC8;BMP7;NFKB1
Nonalcoholic fatty liver disease WP4396	10/155	0.236172	0.54913	0	0	1.30732	1.88671	GSK3B;PRKAA2;PIK3CA;LEPR;PRKAG2;NDUFC2;UQCRC2;PPARA;NFKB1;RELA
Wnt Signaling Pathway and Pluripotency WP399	7/102	0.238694	0.552272	0	0	1.39063	1.99217	MAP2K4;GSK3B;PRKCH;PRKCE;FZD6;PPP2R3A;PPARD
Serotonin Receptor 4/6/7 and NR3C Signaling WP734	43880	0.240628	0.554032	0	0	2.13299	3.03845	RPS6KA5;MAPKAPK2
Ectoderm Differentiation WP2858	9/138	0.242097	0.554708	0	0	1.32153	1.87448	CDH6;MECP2;ARHGEF9;RIT1;SMURF1;PRKAG2;KIFC3;PPARD;CAP2
Photodynamic therapy-induced NF-kB survival signaling WP3617	12844	0.24799	0.565465	0	0	1.73686	2.42183	RELA;NFKB1;BCL2L2
Regulation of toll-like receptor signaling pathway WP1449	9/139	0.248508	0.563922	0	0	1.31202	1.8267	MAP2K4;CYLD;CUEDC2;PIK3CA;STAT1;ZMYND11;MAPK14;NFKB1;RELA
AMP-activated Protein Kinase (AMPK) Signaling WP1403	25324	0.253683	0.572911	0	0	1.46836	2.01411	GYS1;PRKAA2;PIK3CA;LEPR;PRKAG2
Copper homeostasis WP3286	19085	0.254065	0.571042	0	0	1.55872	2.13571	GSK3B;PIK3CA;PTEN;ATP7A
One carbon metabolism and related pathways WP3940	19085	0.254065	0.568335	0	0	1.55872	2.13571	PCYT1A;MTHFR;PLD1;SOD2
Hereditary leiomyomatosis and renal cell carcinoma pathway WP4206	43881	0.259244	0.577185	0	0	2.02634	2.73553	PDHA1;NFE2L2
Imatinib and Chronic Myeloid Leukemia WP3640	43881	0.259244	0.574476	0	0	2.02634	2.73553	CDKN1B;GAB2
Serotonin Receptor 2 and ELK-SRF/GATA4 signaling WP732	43881	0.259244	0.571791	0	0	2.02634	2.73553	MAPKAPK2;ITPR1
Target Of Rapamycin (TOR) Signaling WP1471	13210	0.26146	0.573996	0	0	1.68862	2.26524	PRKAA2;PRKAG2;DDIT4L
Robo4 and VEGF Signaling Pathways Crosstalk WP3943	43836	0.261913	0.572329	0	0	3.37724	4.52462	SLIT2
SCFA and skeletal muscle substrate metabolism WP4030	43836	0.261913	0.569692	0	0	3.37724	4.52462	PPARD
Somatroph axis (GH) and its relationship to dietary restriction and aging WP4186	43836	0.261913	0.567079	0	0	3.37724	4.52462	PTEN
Thyroxine (Thyroid Hormone) Production WP1981	43836	0.261913	0.564489	0	0	3.37724	4.52462	TRH
exRNA mechanism of action and biogenesis WP2805	43836	0.261913	0.561923	0	0	3.37724	4.52462	DICER1
miRNA Biogenesis WP2338	43836	0.261913	0.559381	0	0	3.37724	4.52462	DICER1
Apoptosis-related network due to altered Notch3 in ovarian cancer WP2864	19450	0.265054	0.563539	0	0	1.52932	2.03065	CDKN1B;F2R;THBS1;NFKB1
Cardiac Progenitor Differentiation WP2406	19450	0.265054	0.561012	0	0	1.52932	2.03065	GSK3B;SIRPA;MAPK14;TBX5
Photodynamic therapy-induced HIF-1 survival signaling WP3614	13575	0.275019	0.579504	0	0	1.64298	2.12095	BNIP3L;PDHA1;ANGPT1
miRNAs involvement in the immune response in sepsis WP4329	13575	0.275019	0.576929	0	0	1.64298	2.12095	MAPK14;RELA;NFKB1
Regulation of Apoptosis by Parathyroid Hormone-related Protein WP3872	43883	0.296471	0.619179	0	0	1.84213	2.23967	GSK3B;BCL2L2
Arachidonate Epoxygenase / Epoxide Hydrolase WP678	43837	0.298349	0.620355	0	0	2.89477	3.50121	EPHX2
Cerebral Organic Acidurias, including diseases WP4519	43837	0.298349	0.617635	0	0	2.89477	3.50121	IDH2
PDGF Pathway WP2526	14305	0.302322	0.623126	0	0	1.55872	1.86465	MAP2K4;STAT1;SOS1
Bladder Cancer WP2828	14671	0.316026	0.64854	0	0	1.51976	1.75066	RB1;RPS6KA5;THBS1
Oxidative Damage WP3941	14671	0.316026	0.645732	0	0	1.51976	1.75066	MAP2K4;CDKN1B;NFKB1
ApoE and miR-146 in inflammation and atherosclerosis WP3926	43838	0.332987	0.677457	0	0	2.53293	2.78534	RELA
Caloric restriction and aging WP4191	43838	0.332987	0.67455	0	0	2.53293	2.78534	PPARGC1A
Effects of Nitric Oxide WP1995	43838	0.332987	0.671667	0	0	2.53293	2.78534	MB
Phase I biotransformations, non P450 WP136	43838	0.332987	0.668809	0	0	2.53293	2.78534	PON2
TFs Regulate miRNAs related to cardiac hypertrophy WP1559	43838	0.332987	0.665975	0	0	2.53293	2.78534	NFKB1
Photodynamic therapy-induced NFE2L2 (NRF2) survival signaling WP3612	43885	0.333402	0.663991	0	0	1.68862	1.85479	MAPK14;NFE2L2
miRNA regulation of p53 pathway in prostate cancer WP3982	43885	0.333402	0.661201	0	0	1.68862	1.85479	ZMAT3;PTEN
Common Pathways Underlying Drug Addiction WP2636	15401	0.343447	0.678271	0	0	1.44739	1.54686	PPP1R1A;CAMK2A;PRKACA
Human Complement System WP2806	35582	0.345605	0.679691	0	0	1.25341	1.33169	FGB;ITGB3;MASP1;PRKACA;THBS1;DCN
ESC Pluripotency Pathways WP3931	7/116	0.348239	0.682027	0	0	1.22279	1.28988	GSK3B;FGF7;FZD6;PTEN;SOS1;MAP2K5;MAPK4
MTHFR deficiency WP4288	43886	0.351665	0.685891	0	0	1.62107	1.69415	PCYT1A;MTHFR
Notch Signaling Pathway WP61	22372	0.355084	0.68971	0	0	1.32875	1.37579	GSK3B;JAG1;CIR1;NFKB1
Heme Biosynthesis WP561	43839	0.365918	0.707841	0	0	2.25149	2.26353	ALAS1
Tgif disruption of Shh signaling WP3674	43839	0.365918	0.704952	0	0	2.25149	2.26353	SMAD2
PPAR Alpha Pathway WP2878	43887	0.36975	0.709438	0	0	1.55872	1.55082	ACAA1;PPARA
Prostaglandin Synthesis and Regulation WP98	16497	0.384359	0.734483	0	0	1.35089	1.2917	ANXA3;ANXA4;PPARGC1A
Follicle Stimulating Hormone (FSH) signaling pathway WP2035	43888	0.387631	0.737749	0	0	1.50099	1.4225	PRKACA;MAPK14
Sphingolipid pathway WP1422	43888	0.387631	0.734786	0	0	1.50099	1.4225	SPTLC3;SGPP2
Ethanol metabolism resulting in production of ROS by CYP2E1 WP4269	43840	0.397224	0.749958	0	0	2.02634	1.87083	NFE2L2
Interleukin-1 Induced Activation of NF-kappa-B WP3656	43840	0.397224	0.74697	0	0	2.02634	1.87083	NFKB1
Leptin and adiponectin WP3934	43840	0.397224	0.744006	0	0	2.02634	1.87083	LEPR
Trans-sulfuration pathway WP2333	43840	0.397224	0.741066	0	0	2.02634	1.87083	GOT1
Tryptophan metabolism WP465	16862	0.397877	0.739361	0	0	1.32153	1.21794	ALDH1A1;OGDH;HADH
Genes related to primary cilium development (based on CRISPR) WP4536	6/103	0.398959	0.738465	0	0	1.18039	1.08466	BBS2;TTC23;BBS10;DYNLT1;CLUAP1;TTBK2
Toll-like Receptor Signaling Pathway WP75	6/103	0.398959	0.735581	0	0	1.18039	1.08466	MAP2K4;PIK3CA;STAT1;MAPK14;NFKB1;RELA
Apoptosis WP254	30803	0.40027	0.735126	0	0	1.20616	1.10438	MAP2K4;BNIP3L;RELA;NFKB1;BCL2L2
Vitamin D Receptor Pathway WP2877	10/182	0.410046	0.750162	0	0	1.11337	0.992557	CDKN1B;BCL6;SATB1;CLEC16A;MED9;NFATC2;TIMP3;G0S2;TRAK1;PPARD
Statin Pathway WP430	43890	0.422688	0.770304	0	0	1.39748	1.2034	LRP1;MTTP
NAD metabolism, sirtuins and aging WP3630	43841	0.426986	0.775143	0	0	1.84213	1.56766	NFKB1
One Carbon Metabolism WP241	10990	0.439824	0.795391	0	0	1.35089	1.1096	AMT;MTHFR
IL-10 Anti-inflammatory Signaling Pathway WP4495	43842	0.455279	0.820198	0	0	1.68862	1.32868	STAT1
MAPK and NFkB Signalling Pathways Inhibited by Yersinia YopJ WP3849	43842	0.455279	0.817079	0	0	1.68862	1.32868	NFKB1
Toll-like Receptor Signaling WP3858	11355	0.456677	0.816484	0	0	1.30732	1.02465	RELA;NFKB1
Trans-sulfuration and one carbon metabolism WP2525	11355	0.456677	0.813403	0	0	1.30732	1.02465	AMT;MTHFR
BMP2-WNT4-FOXO1 Pathway in Human Primary Endometrial Stromal Cell Differentiation WP3876	43843	0.482177	0.855593	0	0	1.55872	1.137	DCN
Development of pulmonary dendritic cells and macrophage subsets WP3892	43843	0.482177	0.852388	0	0	1.55872	1.137	CSF1
Dopamine metabolism WP2436	43843	0.482177	0.849208	0	0	1.55872	1.137	PRKACA
Estrogen Receptor Pathway WP2881	43843	0.482177	0.846051	0	0	1.55872	1.137	PPARA
Kennedy pathway from Sphingolipids WP3933	43843	0.482177	0.842917	0	0	1.55872	1.137	PCYT1A
Vitamin B12 Disorders WP4271	43843	0.482177	0.839807	0	0	1.55872	1.137	MMAB
Alpha 6 Beta 4 signaling pathway WP244	12086	0.48948	0.849391	0	0	1.22809	0.87736	MAPK14;SOS1
Pregnane X Receptor pathway WP2876	12086	0.48948	0.84628	0	0	1.22809	0.87736	NCOA2;PPARGC1A
Prion disease pathway WP3995	12086	0.48948	0.843192	0	0	1.22809	0.87736	CHD2;NFKB1
Breast cancer pathway WP4262	8/154	0.492465	0.845248	0	0	1.05265	0.745623	RB1;GSK3B;FGF7;PIK3CA;FZD6;PTEN;SOS1;SOS2
BDNF-TrkB Signaling WP3676	12451	0.505408	0.864321	0	0	1.19197	0.813385	GAB2;SOS1
Type 2 papillary renal cell carcinoma WP4241	12451	0.505408	0.8612	0	0	1.19197	0.813385	FH;TFEB
ERK Pathway in Huntington's Disease WP3853	43844	0.507748	0.862076	0	0	1.44739	0.980995	RPS6KA5
Fatty Acid Omega Oxidation WP206	43845	0.532058	0.900112	0	0	1.35089	0.852418	ALDH1A1
Mammary gland development pathway - Embryonic development (Stage 1 of 4) WP2813	43845	0.532058	0.896898	0	0	1.35089	0.852418	CLDN4
Oxysterols derived from cholesterol WP4545	43845	0.532058	0.893706	0	0	1.35089	0.852418	EPHX2
Regulation of sister chromatid separation at the metaphase-anaphase transition WP4240	43845	0.532058	0.890537	0	0	1.35089	0.852418	STAG1
Role of Osx and miRNAs in tooth development WP3971	43845	0.532058	0.88739	0	0	1.35089	0.852418	BMP7
miRNAs involved in DNA damage response WP1545	43845	0.532058	0.884265	0	0	1.35089	0.852418	CDKN1B
Fibrin Complement Receptor 3 Signaling Pathway WP4136	13547	0.551205	0.912874	0	0	1.09532	0.652425	RASSF5;NFKB1
Metabolic pathway of LDL, HDL and TG, including diseases WP4522	43846	0.555168	0.916222	0	0	1.26646	0.745294	MTTP
NAD+ metabolism WP3644	43846	0.555168	0.913029	0	0	1.26646	0.745294	SIRT2
Osteoclast Signaling WP12	43846	0.555168	0.909859	0	0	1.26646	0.745294	ITGB3
Parkinsons Disease Pathway WP2371	13912	0.565792	0.924062	0	0	1.0665	0.6074	MAPK14;SNCAIP
ACE Inhibitor Pathway WP554	43847	0.577138	0.939342	0	0	1.19197	0.655192	AGT
Amplification and Expansion of Oncogenic Pathways as Metastatic Traits WP3678	43847	0.577138	0.936114	0	0	1.19197	0.655192	JAG1
Leptin Insulin Overlap WP3935	43847	0.577138	0.932908	0	0	1.19197	0.655192	LEPR
NOTCH1 regulation of human endothelial cell calcification WP3413	43847	0.577138	0.929724	0	0	1.19197	0.655192	JAG1
Serotonin and anxiety WP3947	43847	0.577138	0.926562	0	0	1.19197	0.655192	CAMK2B
Sulfation Biotransformation Reaction WP692	43847	0.577138	0.923421	0	0	1.19197	0.655192	SULT1C4
G13 Signaling Pathway WP524	14277	0.580034	0.924919	0	0	1.03915	0.565993	PIK3CA;ARHGDIB
Prader-Willi and Angelman Syndrome WP3998	22341	0.585176	0.929977	0	0	0.996562	0.534	RB1;FEZ1;FEZ2
Ferroptosis WP4313	14642	0.593929	0.94072	0	0	1.01317	0.527858	ACSL1;NCOA4
Simplified Depiction of MYD88 Distinct Input-Output Pathway WP3877	43848	0.598024	0.944038	0	0	1.12575	0.578773	NFKB1
Viral Acute Myocarditis WP4298	30773	0.600313	0.944492	0	0	0.964925	0.492405	GSK3B;ENDOG;STAT1;SOS1
Genotoxicity pathway WP4286	23071	0.607224	0.952192	0	0	0.964925	0.48136	SEL1L;ITPR1;RAPGEF2
Nucleotide-binding Oligomerization Domain (NOD) pathway WP1433	15008	0.607477	0.949434	0	0	0.98846	0.492689	ERBIN;RELA
Pathways in clear cell renal cell carcinoma WP4018	31138	0.609704	0.94977	0	0	0.953573	0.47181	PTEN;CDH13;ENO3;PFKM
Apoptosis Modulation by HSP70 WP384	43849	0.617879	0.959339	0	0	1.0665	0.513477	NFKB1
Extracellular vesicles in the crosstalk of cardiac cells WP4300	43849	0.617879	0.956194	0	0	1.0665	0.513477	PTEN
Farnesoid X Receptor Pathway WP2879	43849	0.617879	0.953069	0	0	1.0665	0.513477	PPARGC1A
Mitochondrial Gene Expression WP391	43849	0.617879	0.949964	0	0	1.0665	0.513477	PPARGC1A
Small Ligand GPCRs WP247	43849	0.617879	0.94688	0	0	1.0665	0.513477	S1PR1
G1 to S cell cycle control WP45	23437	0.617951	0.943925	0	0	0.949848	0.457206	RB1;CDKN1B;TFDP2
Eukaryotic Transcription Initiation WP405	15738	0.633535	0.964607	0	0	0.942485	0.430188	ILK;TAF7
Hematopoietic Stem Cell Gene Regulation by GABP alpha/beta Complex WP3657	43850	0.636755	0.966393	0	0	1.01317	0.457315	PTEN
Nanomaterial induced apoptosis WP2507	43850	0.636755	0.963296	0	0	1.01317	0.457315	ENDOG
Urea cycle and metabolism of amino groups WP497	43850	0.636755	0.960218	0	0	1.01317	0.457315	GATM
Glycerophospholipid Biosynthetic Pathway WP2533	43851	0.654699	0.984133	0	0	0.964925	0.408723	CRLS1
Nicotine Activity on Dopaminergic Neurons WP1602	43851	0.654699	0.981009	0	0	0.964925	0.408723	PRKACA
Notch Signaling WP268	16469	0.658219	0.983162	0	0	0.900597	0.376646	KAT2B;JAG1
Apoptosis Modulation and Signaling WP1772	33329	0.663116	0.987353	0	0	0.8907	0.365904	ENDOG;BAG3;NFKB1;BCL2L2
Complement Activation WP545	43852	0.671757	0.997074	0	0	0.921065	0.366453	MASP1
Methionine De Novo and Salvage Pathway WP3580	43852	0.671757	0.993948	0	0	0.921065	0.366453	MSRB3
NAD+ biosynthetic pathways WP3645	43852	0.671757	0.990842	0	0	0.921065	0.366453	SIRT2
Transcription factor regulation in adipogenesis WP3599	43852	0.671757	0.987755	0	0	0.921065	0.366453	PPARGC1A
LncRNA involvement in canonical Wnt signaling and colorectal cancer WP4258	34425	0.687881	1	0	0	0.862273	0.322611	GSK3B;CDK8;SERPINF1;FZD6
Blood Clotting Cascade WP272	43853	0.687974	1	0	0	0.881018	0.329505	FGB
Differentiation Pathway WP2848	17564	0.692721	1	0	0	0.844309	0.309969	CSF1;HGF
Endoderm Differentiation WP2853	6/141	0.701241	1	0	0	0.862273	0.306024	SMAD2;SMAD3;ATP8B2;STAT1;PBX3;BMP7
GPCRs, Class B Secretin-like WP334	43854	0.70339	1	0	0	0.844309	0.297065	CALCRL
Chromosomal and microsatellite instability in colorectal cancer WP4216	26724	0.705377	1	0	0	0.832743	0.290646	SMAD2;GSK3B;SMAD3
Synaptic Vesicle Pathway WP2267	18660	0.724297	1	0	0	0.794644	0.256316	SLC25A4;VAMP2
Cytokines and Inflammatory Response WP530	43856	0.731977	1	0	0	0.779362	0.243166	CSF1
NRF2 pathway WP2884	6/146	0.732386	1	0	0	0.832743	0.259356	GSTM3;SERPINA1;GSTA4;HGF;NFE2L2;PPARD
Translation Factors WP107	19025	0.734195	1	0	0	0.779362	0.240808	EEF1A2;PAIP1
Wnt Signaling Pathway WP363	19025	0.734195	1	0	0	0.779362	0.240808	GSK3B;NFATC2
Phosphodiesterases in neuronal function WP4222	19391	0.743789	1	0	0	0.764658	0.226337	PDE4B;PDE8A
Canonical and Non-canonical Notch signaling WP3845	43857	0.745221	1	0	0	0.750497	0.220702	JAG1
Eicosanoid Synthesis WP167	43857	0.745221	1	0	0	0.750497	0.220702	PNPLA8
Intraflagellar transport proteins binding to dynein WP4532	43857	0.745221	1	0	0	0.750497	0.220702	DYNLT1
Electron Transport Chain (OXPHOS system in mitochondria) WP111	4/103	0.754297	1	0	0	0.786929	0.221889	ATP5PF;NDUFC2;UQCRC2;SLC25A4
TLR4 Signaling and Tolerance WP3851	43858	0.757811	1	0	0	0.723694	0.200695	NFKB1
Dopaminergic Neurogenesis WP2855	43860	0.781158	1	0	0	0.675447	0.166821	ALDH1A1
Inflammatory Response Pathway WP453	43860	0.781158	1	0	0	0.675447	0.166821	THBS1
Matrix Metalloproteinases WP129	43860	0.781158	1	0	0	0.675447	0.166821	TIMP3
GABA receptor Signaling WP4159	43861	0.791974	1	0	0	0.653659	0.152451	ABAT
Tumor suppressor activity of SMARCB1 WP4204	43861	0.791974	1	0	0	0.653659	0.152451	RB1
Oxidative phosphorylation WP623	21947	0.802937	1	0	0	0.675447	0.148246	ATP5PF;NDUFC2
ncRNAs involved in Wnt signaling in hepatocellular carcinoma WP4336	31472	0.803433	1	0	0	0.706864	0.154706	GSK3B;SERPINF1;FZD6
Retinoblastoma Gene in Cancer WP2446	31837	0.809695	1	0	0	0.698739	0.147502	RB1;CDKN1B;TFDP2
Oxidation by Cytochrome P450 WP43	22313	0.810319	1	0	0	0.664375	0.139736	CYB5R1;CYB5R3
Fluoropyrimidine Activity WP1601	12055	0.81203	1	0	0	0.614043	0.127855	MTHFR
GPCRs, Other WP117	33298	0.833083	1	0	0	0.668025	0.121996	CHRM2;F2R;S1PR1
Wnt Signaling in Kidney Disease WP4150	13150	0.838551	1	0	0	0.562873	0.0991107	FZD6
Spinal Cord Injury WP2431	4/118	0.840013	1	0	0	0.686896	0.119752	RB1;CDKN1B;SLIT2;AQP1
The effect of progerin on the involved genes in Hutchinson-Gilford Progeria Syndrome WP4320	13516	0.846533	1	0	0	0.54766	0.0912437	RB1
Type II interferon signaling (IFNG) WP619	13516	0.846533	1	0	0	0.54766	0.0912437	STAT1
Histone Modifications WP2369	24504	0.849631	1	0	0	0.604878	0.0985665	KMT2E;SETD7
Amyotrophic lateral sclerosis (ALS) WP2447	13881	0.85412	1	0	0	0.533248	0.0840843	MAPK14
Striated Muscle Contraction Pathway WP383	13881	0.85412	1	0	0	0.533248	0.0840843	TCAP
DNA Damage Response WP707	24869	0.855413	1	0	0	0.595983	0.0930752	RB1;CDKN1B
Parkin-Ubiquitin Proteasomal System pathway WP2359	25600	0.866371	1	0	0	0.578955	0.0830466	RNF19A;SNCAIP
Microglia Pathogen Phagocytosis Pathway WP3937	14611	0.86819	1	0	0	0.506586	0.0716035	PIK3CA
miRNA Regulation of DNA Damage Response WP1530	25965	0.871559	1	0	0	0.570801	0.0784688	RB1;CDKN1B
ATM Signaling Network in Development and Disease WP3878	16438	0.897714	1	0	0	0.450298	0.048589	NFKB1
Pyrimidine metabolism WP4022	31079	0.927105	1	0	0	0.476786	0.0360872	NME6;POLR3GL
Hair Follicle Development: Cytodifferentiation (Part 3 of 3) WP2840	31809	0.932881	1	0	0	0.465826	0.0323643	NFKB1;DKK3
Mitochondrial complex I assembly model OXPHOS system WP4324	20455	0.941463	1	0	0	0.361847	0.0218266	NDUFC2
Proteasome Degradation WP183	22647	0.956832	1	0	0	0.326829	0.0144222	PSME1
Metapathway biotransformation Phase I and II WP702	4/183	0.981758	1	0	0	0.442916	0.00815433	GSTM3;GSTA4;EPHX2;SULT1C4
DNA IR-damage and cellular response via ATR WP4016	29221	0.982697	1	0	0	0.253293	0.00442121	BCL6
mRNA Processing WP411	2/126	0.987362	1	0	0	0.321642	0.00409087	SPOP;DICER1
Allograft Rejection WP2328	32509	0.989048	1	0	0	0.227679	0.00250733	STAT1
GPCRs, Class A Rhodopsin-like WP455	5/257	0.996156	1	0	0	0.39423	0.00151836	CHRM2;RABGAP1;HRH2;F2R;ADRA2B

[truncated: 5 more sheets: cluster 11, cluster 12, cluster 13, cluster 14, cluster 15]
